# Supplementary material for: Synthesis and lanthanide coordination chemistry of trifluoromethyl derivatives of phosphinoylmethyl pyridine N-oxides
Source: Royal Society of Chemistry journal article supplement (doi:10.1039/b905947d), 2009-01-01
Supplement: b905947d.pdf [file b905947d.pdf]

## Supplementary Material

### Synthesis and Lanthanide Coordination Chemistry of Trifluoromethyl Derivatives of Phosphinoymethyl-pyridine N-oxides

Sylvie Pailloux,<sup>†</sup> Cornel Edicome Shirima,<sup>†</sup> Eileen N. Duesler,<sup>†</sup> Robert T. Paine,<sup>\*†</sup> John R.  
Klaehn<sup>‡</sup> Michael E. McIlwain,<sup>‡</sup> and Benjamin P. Hay<sup>§</sup>

#### Contents

1. X-ray Crystallographic data for **3c**
2. X-ray Crystallographic data for **1c**
3. X-ray Crystallographic data for **3d**
4. X-ray Crystallographic data for **1d**
5. X-ray Crystallographic data for [Yb(**1c**)(NO<sub>3</sub>)<sub>3</sub>(DMF)](DMF)(H<sub>2</sub>O)<sub>1/2</sub>
6. Computational material for **3c**, **1c**, **3d**, **1d**.

X-ray Crystallographic data for **3c**.

# Crystal Structure Report

Prepared for:

Professor R. T. Paine/ Sylvie Pailloux  
rtpaine@unm.edu,spailou@unm.edu

Compound:

Rps21/slp-11-38  
C<sub>20</sub> H<sub>14</sub> F<sub>6</sub> N O P

Prepared by:

Eileen Duesler

[Duesler@unm.edu](mailto:Duesler@unm.edu)

277-6649

Issue date:

January 22, 2007

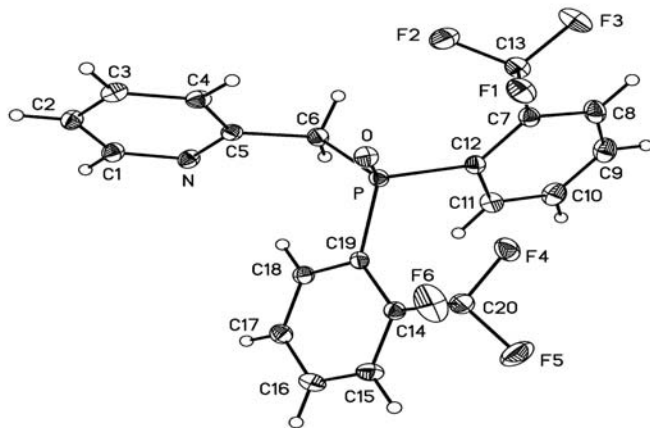

Rpsl2111b.jpg \$225



Table 1. Crystal data and structure refinement for rpsl21.

|                                   |                                                      |                 |
|-----------------------------------|------------------------------------------------------|-----------------|
| Identification code               | rpsl21                                               |                 |
| Empirical formula                 | C <sub>20</sub> H <sub>14</sub> F <sub>6</sub> N O P |                 |
| Formula weight                    | 429.29                                               |                 |
| Temperature                       | 223(2) K                                             |                 |
| Wavelength                        | 0.71073 Å                                            |                 |
| Crystal system                    | Triclinic                                            |                 |
| Space group                       | P-1                                                  |                 |
| Unit cell dimensions              | a = 8.9554(4) Å                                      | α = 88.599(2)°. |
|                                   | b = 9.6902(4) Å                                      | β = 74.127(2)°. |
|                                   | c = 11.0339(4) Å                                     | γ = 88.578(2)°. |
| Volume                            | 920.57(7) Å <sup>3</sup>                             |                 |
| Z                                 | 2                                                    |                 |
| Density (calculated)              | 1.549 Mg/m <sup>3</sup>                              |                 |
| Absorption coefficient            | 0.219 mm <sup>-1</sup>                               |                 |
| F(000)                            | 436                                                  |                 |
| Crystal size                      | 0.48 x 0.28 x 0.12 mm <sup>3</sup>                   |                 |
| Theta range for data collection   | 2.61 to 32.13°.                                      |                 |
| Index ranges                      | -10 ≤ h ≤ 13, -14 ≤ k ≤ 14, -16 ≤ l ≤ 16             |                 |
| Reflections collected             | 19527                                                |                 |
| Independent reflections           | 6424 [R(int) = 0.0162]                               |                 |
| Completeness to theta = 32.13°    | 99.4 %                                               |                 |
| Absorption correction             | Semi-empirical from equivalents                      |                 |
| Max. and min. transmission        | 0.97 and 0.90                                        |                 |
| Refinement method                 | Full-matrix least-squares on F <sup>2</sup>          |                 |
| Data / restraints / parameters    | 6424 / 0 / 262                                       |                 |
| Goodness-of-fit on F <sup>2</sup> | 1.037                                                |                 |
| Final R indices [I > 2σ(I)]       | R1 = 0.0500, wR2 = 0.1459                            |                 |
| R indices (all data)              | R1 = 0.0628, wR2 = 0.1615                            |                 |
| Largest diff. peak and hole       | 0.785 and -0.294 e.Å <sup>-3</sup>                   |                 |

Table 2. Atomic coordinates ( $\times 10^4$ ) and equivalent isotropic displacement parameters ( $\text{\AA}^2 \times 10^3$ ) for rpsl21.  $U(\text{eq})$  is defined as one third of the trace of the orthogonalized  $U^{\text{ij}}$  tensor.

|       | x        | y        | z       | U(eq) |
|-------|----------|----------|---------|-------|
| P     | 7616(1)  | 2455(1)  | 3893(1) | 30(1) |
| O     | 6641(1)  | 3652(1)  | 3723(1) | 38(1) |
| N     | 6873(2)  | 1901(2)  | 7434(1) | 39(1) |
| C(1)  | 6315(2)  | 2507(2)  | 8550(2) | 42(1) |
| C(2)  | 5088(2)  | 3443(2)  | 8813(2) | 42(1) |
| C(3)  | 4418(2)  | 3813(2)  | 7862(2) | 43(1) |
| C(4)  | 4970(2)  | 3196(2)  | 6701(2) | 39(1) |
| C(5)  | 6174(2)  | 2223(2)  | 6531(1) | 33(1) |
| C(6)  | 6745(2)  | 1445(2)  | 5320(2) | 37(1) |
| C(7)  | 6960(2)  | 731(2)   | 2005(2) | 36(1) |
| C(8)  | 7329(3)  | -384(2)  | 1194(2) | 49(1) |
| C(9)  | 8651(3)  | -1172(2) | 1102(2) | 56(1) |
| C(10) | 9647(3)  | -859(2)  | 1806(2) | 52(1) |
| C(11) | 9317(2)  | 264(2)   | 2595(2) | 43(1) |
| C(12) | 7962(2)  | 1082(2)  | 2720(1) | 34(1) |
| C(13) | 5466(2)  | 1505(2)  | 2087(2) | 43(1) |
| F(1)  | 5666(2)  | 2808(1)  | 1665(1) | 51(1) |
| F(2)  | 4557(1)  | 1542(1)  | 3281(1) | 56(1) |
| F(3)  | 4623(2)  | 929(2)   | 1405(2) | 66(1) |
| C(14) | 10522(2) | 3814(2)  | 3038(1) | 33(1) |
| C(15) | 11899(2) | 4266(2)  | 3227(2) | 43(1) |
| C(16) | 12329(2) | 3907(2)  | 4306(2) | 46(1) |
| C(17) | 11391(2) | 3059(2)  | 5203(2) | 44(1) |
| C(18) | 10006(2) | 2594(2)  | 5029(2) | 39(1) |
| C(19) | 9534(2)  | 2962(2)  | 3955(1) | 32(1) |
| C(20) | 10183(2) | 4318(2)  | 1840(2) | 40(1) |
| F(4)  | 9238(2)  | 3535(1)  | 1433(1) | 53(1) |
| F(5)  | 11470(2) | 4413(2)  | 893(1)  | 87(1) |
| F(6)  | 9527(2)  | 5571(1)  | 1958(2) | 78(1) |

Table 3. Bond lengths [ $\text{\AA}$ ] and angles [ $^\circ$ ] for rpsl21.

---

|             |            |
|-------------|------------|
| P-O         | 1.4734(12) |
| P-C(19)     | 1.8175(15) |
| P-C(6)      | 1.8262(15) |
| P-C(12)     | 1.8396(15) |
| N-C(1)      | 1.339(2)   |
| N-C(5)      | 1.342(2)   |
| C(1)-C(2)   | 1.380(3)   |
| C(1)-H(1)   | 0.9400     |
| C(2)-C(3)   | 1.380(3)   |
| C(2)-H(2)   | 0.9400     |
| C(3)-C(4)   | 1.385(3)   |
| C(3)-H(3)   | 0.9400     |
| C(4)-C(5)   | 1.390(2)   |
| C(4)-H(4)   | 0.9400     |
| C(5)-C(6)   | 1.507(2)   |
| C(6)-H(6A)  | 0.9800     |
| C(6)-H(6B)  | 0.9800     |
| C(7)-C(8)   | 1.394(2)   |
| C(7)-C(12)  | 1.401(2)   |
| C(7)-C(13)  | 1.499(3)   |
| C(8)-C(9)   | 1.374(3)   |
| C(8)-H(8)   | 0.9400     |
| C(9)-C(10)  | 1.377(3)   |
| C(9)-H(9)   | 0.9400     |
| C(10)-C(11) | 1.385(3)   |
| C(10)-H(10) | 0.9400     |
| C(11)-C(12) | 1.409(2)   |
| C(11)-H(11) | 0.9400     |
| C(13)-F(1)  | 1.334(2)   |
| C(13)-F(3)  | 1.341(2)   |
| C(13)-F(2)  | 1.347(2)   |
| C(14)-C(15) | 1.389(2)   |
| C(14)-C(19) | 1.411(2)   |
| C(14)-C(20) | 1.504(2)   |

|                 |            |
|-----------------|------------|
| C(15)-C(16)     | 1.383(3)   |
| C(15)-H(15)     | 0.9400     |
| C(16)-C(17)     | 1.378(3)   |
| C(16)-H(16)     | 0.9400     |
| C(17)-C(18)     | 1.393(2)   |
| C(17)-H(17)     | 0.9400     |
| C(18)-C(19)     | 1.399(2)   |
| C(18)-H(18)     | 0.9400     |
| C(20)-F(4)      | 1.323(2)   |
| C(20)-F(6)      | 1.329(2)   |
| C(20)-F(5)      | 1.331(2)   |
| O-P-C(19)       | 112.11(7)  |
| O-P-C(6)        | 112.66(8)  |
| C(19)-P-C(6)    | 107.93(7)  |
| O-P-C(12)       | 117.96(7)  |
| C(19)-P-C(12)   | 105.31(7)  |
| C(6)-P-C(12)    | 99.77(7)   |
| C(1)-N-C(5)     | 117.25(15) |
| N-C(1)-C(2)     | 124.04(16) |
| N-C(1)-H(1)     | 118.0      |
| C(2)-C(1)-H(1)  | 118.0      |
| C(1)-C(2)-C(3)  | 118.30(16) |
| C(1)-C(2)-H(2)  | 120.8      |
| C(3)-C(2)-H(2)  | 120.8      |
| C(2)-C(3)-C(4)  | 118.73(16) |
| C(2)-C(3)-H(3)  | 120.6      |
| C(4)-C(3)-H(3)  | 120.6      |
| C(3)-C(4)-C(5)  | 119.18(15) |
| C(3)-C(4)-H(4)  | 120.4      |
| C(5)-C(4)-H(4)  | 120.4      |
| N-C(5)-C(4)     | 122.39(15) |
| N-C(5)-C(6)     | 116.08(14) |
| C(4)-C(5)-C(6)  | 121.52(14) |
| C(5)-C(6)-P     | 117.13(11) |
| C(5)-C(6)-H(6A) | 108.0      |

|                   |            |
|-------------------|------------|
| P-C(6)-H(6A)      | 108.0      |
| C(5)-C(6)-H(6B)   | 108.0      |
| P-C(6)-H(6B)      | 108.0      |
| H(6A)-C(6)-H(6B)  | 107.3      |
| C(8)-C(7)-C(12)   | 119.94(17) |
| C(8)-C(7)-C(13)   | 117.83(16) |
| C(12)-C(7)-C(13)  | 122.22(14) |
| C(9)-C(8)-C(7)    | 121.12(19) |
| C(9)-C(8)-H(8)    | 119.4      |
| C(7)-C(8)-H(8)    | 119.4      |
| C(8)-C(9)-C(10)   | 120.11(17) |
| C(8)-C(9)-H(9)    | 119.9      |
| C(10)-C(9)-H(9)   | 119.9      |
| C(9)-C(10)-C(11)  | 119.56(19) |
| C(9)-C(10)-H(10)  | 120.2      |
| C(11)-C(10)-H(10) | 120.2      |
| C(10)-C(11)-C(12) | 121.65(18) |
| C(10)-C(11)-H(11) | 119.2      |
| C(12)-C(11)-H(11) | 119.2      |
| C(7)-C(12)-C(11)  | 117.60(14) |
| C(7)-C(12)-P      | 125.90(12) |
| C(11)-C(12)-P     | 116.38(12) |
| F(1)-C(13)-F(3)   | 105.36(15) |
| F(1)-C(13)-F(2)   | 107.23(15) |
| F(3)-C(13)-F(2)   | 106.37(16) |
| F(1)-C(13)-C(7)   | 113.45(15) |
| F(3)-C(13)-C(7)   | 112.45(15) |
| F(2)-C(13)-C(7)   | 111.49(15) |
| C(15)-C(14)-C(19) | 120.01(15) |
| C(15)-C(14)-C(20) | 115.50(14) |
| C(19)-C(14)-C(20) | 124.48(14) |
| C(16)-C(15)-C(14) | 121.34(16) |
| C(16)-C(15)-H(15) | 119.3      |
| C(14)-C(15)-H(15) | 119.3      |
| C(17)-C(16)-C(15) | 119.48(16) |
| C(17)-C(16)-H(16) | 120.3      |



|                   |            |
|-------------------|------------|
| C(15)-C(16)-H(16) | 120.3      |
| C(16)-C(17)-C(18) | 119.97(16) |
| C(16)-C(17)-H(17) | 120.0      |
| C(18)-C(17)-H(17) | 120.0      |
| C(17)-C(18)-C(19) | 121.59(16) |
| C(17)-C(18)-H(18) | 119.2      |
| C(19)-C(18)-H(18) | 119.2      |
| C(18)-C(19)-C(14) | 117.60(14) |
| C(18)-C(19)-P     | 118.17(11) |
| C(14)-C(19)-P     | 123.96(11) |
| F(4)-C(20)-F(6)   | 105.56(16) |
| F(4)-C(20)-F(5)   | 105.89(16) |
| F(6)-C(20)-F(5)   | 106.10(17) |
| F(4)-C(20)-C(14)  | 114.87(13) |
| F(6)-C(20)-C(14)  | 111.98(15) |
| F(5)-C(20)-C(14)  | 111.81(16) |

---

Table 4. Anisotropic displacement parameters ( $\text{\AA}^2 \times 10^3$ ) for rpsl21. The anisotropic displacement factor exponent takes the form:  $-2\pi^2 [ h^2 a^{*2} U^{11} + \dots + 2 h k a^* b^* U^{12} ]$

|       | $U^{11}$ | $U^{22}$ | $U^{33}$ | $U^{23}$ | $U^{13}$ | $U^{12}$ |
|-------|----------|----------|----------|----------|----------|----------|
| P     | 35(1)    | 31(1)    | 25(1)    | 1(1)     | -9(1)    | -4(1)    |
| O     | 41(1)    | 36(1)    | 37(1)    | 0(1)     | -12(1)   | 2(1)     |
| N     | 38(1)    | 48(1)    | 29(1)    | 5(1)     | -8(1)    | 3(1)     |
| C(1)  | 43(1)    | 55(1)    | 28(1)    | 4(1)     | -10(1)   | 0(1)     |
| C(2)  | 43(1)    | 46(1)    | 35(1)    | -3(1)    | -4(1)    | -3(1)    |
| C(3)  | 36(1)    | 43(1)    | 46(1)    | 3(1)     | -6(1)    | 1(1)     |
| C(4)  | 34(1)    | 48(1)    | 37(1)    | 7(1)     | -12(1)   | -3(1)    |
| C(5)  | 33(1)    | 38(1)    | 27(1)    | 6(1)     | -7(1)    | -7(1)    |
| C(6)  | 44(1)    | 37(1)    | 30(1)    | 3(1)     | -8(1)    | -10(1)   |
| C(7)  | 46(1)    | 32(1)    | 32(1)    | 0(1)     | -11(1)   | -5(1)    |
| C(8)  | 69(1)    | 38(1)    | 41(1)    | -9(1)    | -16(1)   | -7(1)    |
| C(9)  | 76(1)    | 39(1)    | 49(1)    | -14(1)   | -8(1)    | 4(1)     |
| C(10) | 60(1)    | 40(1)    | 52(1)    | -6(1)    | -7(1)    | 9(1)     |
| C(11) | 48(1)    | 38(1)    | 44(1)    | -1(1)    | -16(1)   | 3(1)     |
| C(12) | 41(1)    | 30(1)    | 30(1)    | 0(1)     | -9(1)    | -2(1)    |
| C(13) | 47(1)    | 41(1)    | 44(1)    | 0(1)     | -18(1)   | -5(1)    |
| F(1)  | 65(1)    | 42(1)    | 53(1)    | 4(1)     | -31(1)   | 0(1)     |
| F(2)  | 44(1)    | 64(1)    | 55(1)    | 2(1)     | -7(1)    | 1(1)     |
| F(3)  | 69(1)    | 63(1)    | 81(1)    | -10(1)   | -46(1)   | -8(1)    |
| C(14) | 37(1)    | 31(1)    | 32(1)    | -1(1)    | -9(1)    | -3(1)    |
| C(15) | 40(1)    | 40(1)    | 50(1)    | 6(1)     | -14(1)   | -10(1)   |
| C(16) | 41(1)    | 47(1)    | 55(1)    | -2(1)    | -21(1)   | -7(1)    |
| C(17) | 42(1)    | 56(1)    | 39(1)    | -3(1)    | -18(1)   | 0(1)     |
| C(18) | 38(1)    | 50(1)    | 30(1)    | 2(1)     | -11(1)   | -4(1)    |
| C(19) | 35(1)    | 34(1)    | 26(1)    | -3(1)    | -9(1)    | -2(1)    |
| C(20) | 46(1)    | 40(1)    | 34(1)    | 7(1)     | -10(1)   | -9(1)    |
| F(4)  | 71(1)    | 58(1)    | 36(1)    | 10(1)    | -24(1)   | -22(1)   |
| F(5)  | 57(1)    | 155(2)   | 42(1)    | 28(1)    | -2(1)    | -24(1)   |
| F(6)  | 140(2)   | 41(1)    | 71(1)    | 3(1)     | -58(1)   | 13(1)    |

Table 5. Hydrogen coordinates ( $\times 10^4$ ) and isotropic displacement parameters ( $\text{\AA}^2 \times 10^3$ ) for rpsl21.

|       | x     | y     | z    | U(eq) |
|-------|-------|-------|------|-------|
| H(1)  | 6789  | 2280  | 9192 | 51    |
| H(2)  | 4717  | 3819  | 9620 | 51    |
| H(3)  | 3604  | 4472  | 7999 | 52    |
| H(4)  | 4535  | 3431  | 6037 | 47    |
| H(6A) | 5868  | 948   | 5182 | 45    |
| H(6B) | 7514  | 752   | 5432 | 45    |
| H(8)  | 6662  | -601  | 703  | 59    |
| H(9)  | 8875  | -1926 | 558  | 67    |
| H(10) | 10545 | -1404 | 1752 | 63    |
| H(11) | 10014 | 487   | 3057 | 51    |
| H(15) | 12552 | 4828  | 2608 | 52    |
| H(16) | 13254 | 4239  | 4428 | 55    |
| H(17) | 11686 | 2794  | 5931 | 53    |
| H(18) | 9374  | 2019  | 5648 | 47    |

Table 6. Torsion angles [°] for rpsl21.

---

|                        |             |
|------------------------|-------------|
| C(5)-N-C(1)-C(2)       | -0.7(3)     |
| N-C(1)-C(2)-C(3)       | -2.0(3)     |
| C(1)-C(2)-C(3)-C(4)    | 2.2(3)      |
| C(2)-C(3)-C(4)-C(5)    | 0.1(3)      |
| C(1)-N-C(5)-C(4)       | 3.3(2)      |
| C(1)-N-C(5)-C(6)       | -175.47(15) |
| C(3)-C(4)-C(5)-N       | -3.0(2)     |
| C(3)-C(4)-C(5)-C(6)    | 175.65(15)  |
| N-C(5)-C(6)-P          | -117.58(14) |
| C(4)-C(5)-C(6)-P       | 63.67(19)   |
| O-P-C(6)-C(5)          | -50.03(15)  |
| C(19)-P-C(6)-C(5)      | 74.29(14)   |
| C(12)-P-C(6)-C(5)      | -176.00(13) |
| C(12)-C(7)-C(8)-C(9)   | 1.4(3)      |
| C(13)-C(7)-C(8)-C(9)   | -177.71(18) |
| C(7)-C(8)-C(9)-C(10)   | -0.7(3)     |
| C(8)-C(9)-C(10)-C(11)  | -0.8(3)     |
| C(9)-C(10)-C(11)-C(12) | 1.6(3)      |
| C(8)-C(7)-C(12)-C(11)  | -0.7(2)     |
| C(13)-C(7)-C(12)-C(11) | 178.41(16)  |
| C(8)-C(7)-C(12)-P      | -176.58(13) |
| C(13)-C(7)-C(12)-P     | 2.5(2)      |
| C(10)-C(11)-C(12)-C(7) | -0.8(3)     |
| C(10)-C(11)-C(12)-P    | 175.49(15)  |
| O-P-C(12)-C(7)         | -28.36(17)  |
| C(19)-P-C(12)-C(7)     | -154.31(14) |
| C(6)-P-C(12)-C(7)      | 93.91(15)   |
| O-P-C(12)-C(11)        | 155.72(13)  |
| C(19)-P-C(12)-C(11)    | 29.77(14)   |
| C(6)-P-C(12)-C(11)     | -82.02(14)  |
| C(8)-C(7)-C(13)-F(1)   | -115.04(18) |
| C(12)-C(7)-C(13)-F(1)  | 65.8(2)     |
| C(8)-C(7)-C(13)-F(3)   | 4.4(2)      |
| C(12)-C(7)-C(13)-F(3)  | -174.73(15) |

|                         |             |
|-------------------------|-------------|
| C(8)-C(7)-C(13)-F(2)    | 123.77(17)  |
| C(12)-C(7)-C(13)-F(2)   | -55.4(2)    |
| C(19)-C(14)-C(15)-C(16) | -0.4(3)     |
| C(20)-C(14)-C(15)-C(16) | 178.29(17)  |
| C(14)-C(15)-C(16)-C(17) | 1.4(3)      |
| C(15)-C(16)-C(17)-C(18) | -1.3(3)     |
| C(16)-C(17)-C(18)-C(19) | 0.3(3)      |
| C(17)-C(18)-C(19)-C(14) | 0.7(2)      |
| C(17)-C(18)-C(19)-P     | -173.59(14) |
| C(15)-C(14)-C(19)-C(18) | -0.6(2)     |
| C(20)-C(14)-C(19)-C(18) | -179.21(15) |
| C(15)-C(14)-C(19)-P     | 173.29(13)  |
| C(20)-C(14)-C(19)-P     | -5.3(2)     |
| O-P-C(19)-C(18)         | 121.83(13)  |
| C(6)-P-C(19)-C(18)      | -2.81(15)   |
| C(12)-P-C(19)-C(18)     | -108.69(13) |
| O-P-C(19)-C(14)         | -52.06(15)  |
| C(6)-P-C(19)-C(14)      | -176.71(13) |
| C(12)-P-C(19)-C(14)     | 77.42(14)   |
| C(15)-C(14)-C(20)-F(4)  | 156.35(16)  |
| C(19)-C(14)-C(20)-F(4)  | -25.0(2)    |
| C(15)-C(14)-C(20)-F(6)  | -83.3(2)    |
| C(19)-C(14)-C(20)-F(6)  | 95.4(2)     |
| C(15)-C(14)-C(20)-F(5)  | 35.7(2)     |
| C(19)-C(14)-C(20)-F(5)  | -145.71(18) |

---

Table 7. Possible Hydrogen bonds for rpsl21 [ $\text{\AA}$  and  $^\circ$ ].

| D-H...A          | d(D-H) | d(H...A) | d(D...A) | $\angle(\text{DHA})$ |
|------------------|--------|----------|----------|----------------------|
| C(8)-H(8)...F(3) | 0.94   | 2.30     | 2.664(3) | 102.5                |
| C(18)-H(18)...N  | 0.94   | 2.55     | 3.362(2) | 144.8                |

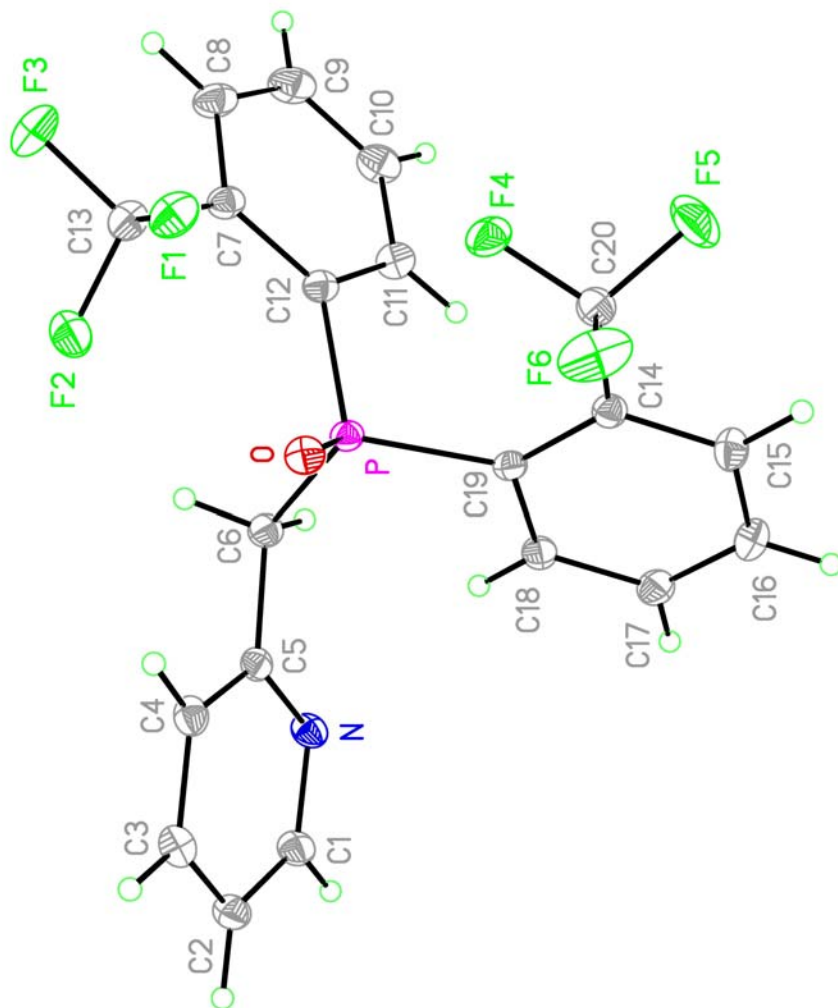

Figure 1. rpsl2111.jpg, Single molecule view, 20% thermal displacement ellipsoids 20%,  
rpsl2111b.jpg=b/w

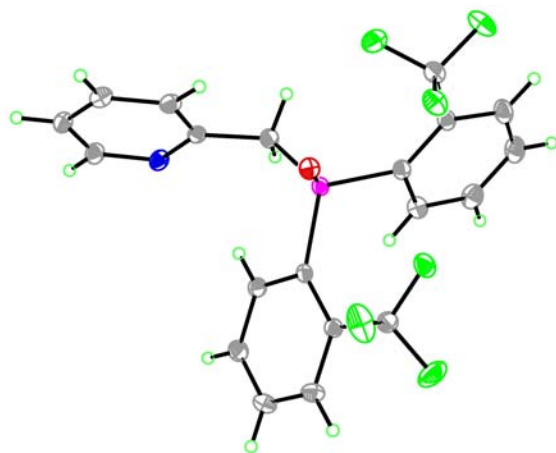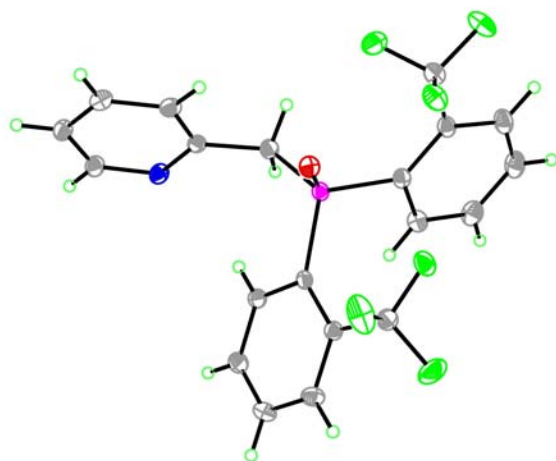

Figure 1.rpsl21s1.jpg also rpsl21s1b.jpg[b/w], stereoview of single molecule.



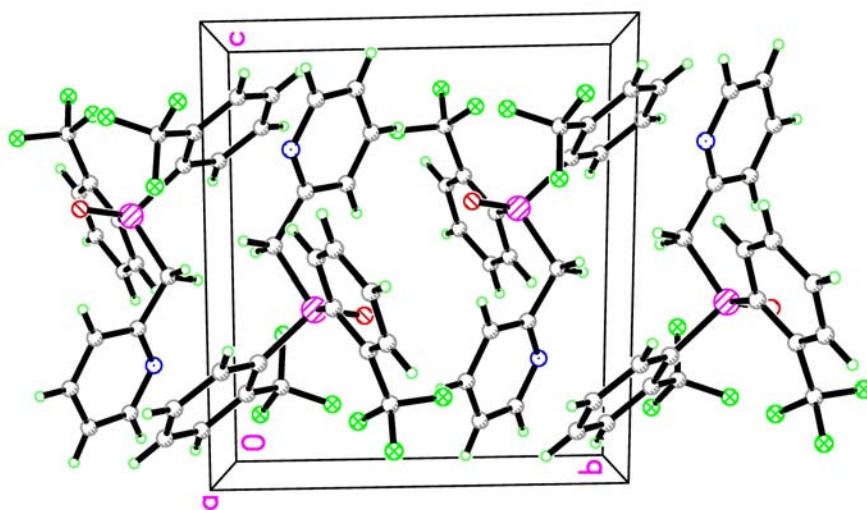

Figure 3.rpsl21a11.jpg packing view down a-axis,color,also rpsl21a11b.jpg b/w

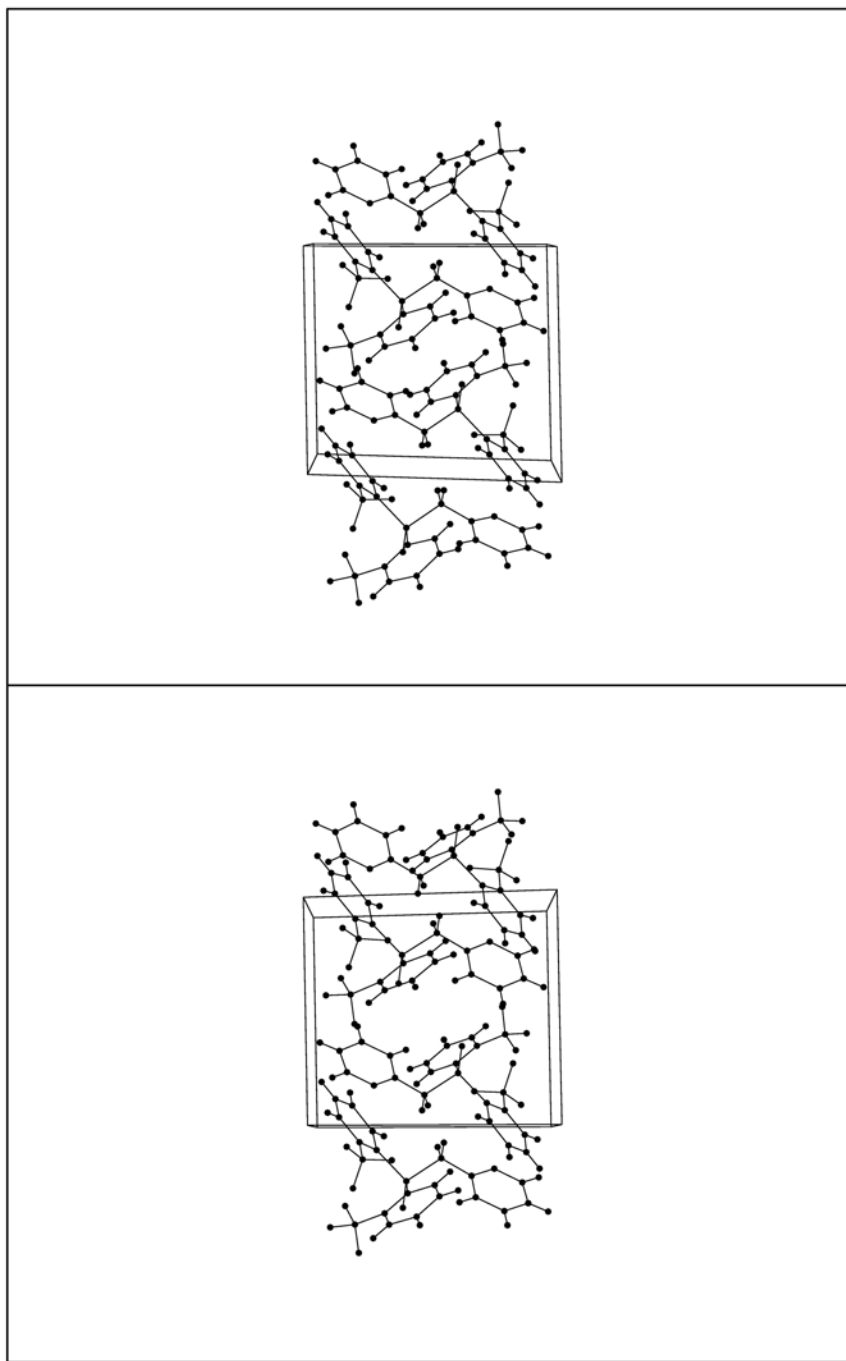

Figure 4.rpsl21as.jpg stereoview packing, down a-axis

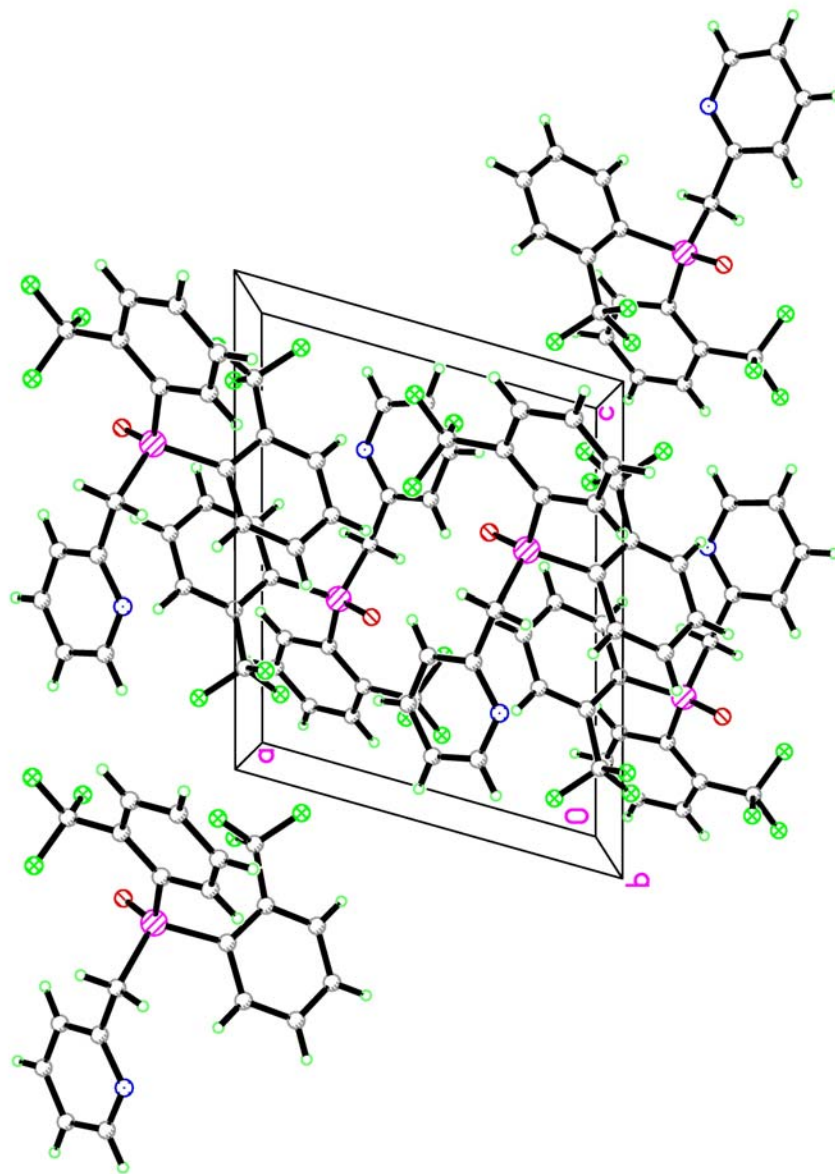

Figure 5.rpsl21bl.jpg packing view down b-axis,color,also rpsl21blb.jpg b/w, also see rpsl21bs.jpg

X-ray Crystallographic data for **1c**.

# Crystal Structure Report

Prepared for:

Professor R. T. Paine/ Sylvie Pailloux  
rtpaine@unm.edu,spailou@unm.edu

Compound:

Rpsl32/slp-13.05  
C<sub>20</sub> H<sub>14</sub> F<sub>6</sub> N O<sub>2</sub> P

Prepared by:

Eileen Duesler

[Duesler@unm.edu](mailto:Duesler@unm.edu)

277-6649

Issue date:

November 9, 2007

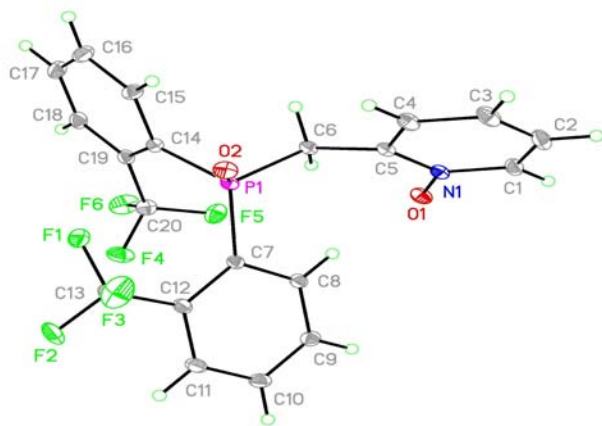

Rpsl32l1.jpg \$225

Table 1. Crystal data and structure refinement for rpsl32.

|                                   |                                                                                                                      |
|-----------------------------------|----------------------------------------------------------------------------------------------------------------------|
| Identification code               | rpsl32                                                                                                               |
| Empirical formula                 | C <sub>20</sub> H <sub>14</sub> F <sub>6</sub> N O <sub>2</sub> P                                                    |
| Formula weight                    | 445.29                                                                                                               |
| Temperature                       | 225(2) K                                                                                                             |
| Wavelength                        | 0.71073 Å                                                                                                            |
| Crystal system                    | Triclinic                                                                                                            |
| Space group                       | P-1                                                                                                                  |
| Unit cell dimensions              | a = 7.8219(6) Å      α = 84.198(4)°.<br>b = 8.8196(7) Å      β = 81.657(4)°.<br>c = 14.4992(12) Å    γ = 72.516(4)°. |
| Volume                            | 942.18(13) Å <sup>3</sup>                                                                                            |
| Z                                 | 2                                                                                                                    |
| Density (calculated)              | 1.570 Mg/m <sup>3</sup>                                                                                              |
| Absorption coefficient            | 0.221 mm <sup>-1</sup>                                                                                               |
| F(000)                            | 452                                                                                                                  |
| Crystal size                      | 0.51 x 0.28 x 0.14 mm <sup>3</sup>                                                                                   |
| Theta range for data collection   | 2.74 to 33.07°.                                                                                                      |
| Index ranges                      | -11 ≤ h ≤ 11, -13 ≤ k ≤ 13, -22 ≤ l ≤ 21                                                                             |
| Reflections collected             | 25744                                                                                                                |
| Independent reflections           | 7013 [R(int) = 0.0237]                                                                                               |
| Completeness to theta = 33.07°    | 98.4 %                                                                                                               |
| Absorption correction             | Semi-empirical from equivalents                                                                                      |
| Max. and min. transmission        | 0.970 and 0.900                                                                                                      |
| Refinement method                 | Full-matrix least-squares on F <sup>2</sup>                                                                          |
| Data / restraints / parameters    | 7013 / 0 / 271                                                                                                       |
| Goodness-of-fit on F <sup>2</sup> | 1.050                                                                                                                |
| Final R indices [I > 2σ(I)]       | R1 = 0.0426, wR2 = 0.1187                                                                                            |
| R indices (all data)              | R1 = 0.0515, wR2 = 0.1254                                                                                            |
| Largest diff. peak and hole       | 0.693 and -0.518 e.Å <sup>-3</sup>                                                                                   |

Table 2. Atomic coordinates ( $\times 10^4$ ) and equivalent isotropic displacement parameters ( $\text{\AA}^2 \times 10^3$ ) for rpsl32.  $U(\text{eq})$  is defined as one third of the trace of the orthogonalized  $U^{ij}$  tensor.

|       | x       | y       | z        | $U(\text{eq})$ |
|-------|---------|---------|----------|----------------|
| P(1)  | 1770(1) | 6569(1) | 2068(1)  | 22(1)          |
| O(1)  | 6751(1) | 6216(1) | 531(1)   | 34(1)          |
| O(2)  | 132(1)  | 7898(1) | 1909(1)  | 32(1)          |
| N(1)  | 5493(2) | 7250(1) | 104(1)   | 26(1)          |
| C(1)  | 5987(2) | 8227(2) | -602(1)  | 34(1)          |
| C(2)  | 4718(2) | 9332(2) | -1072(1) | 40(1)          |
| C(3)  | 2905(2) | 9479(2) | -828(1)  | 40(1)          |
| C(4)  | 2423(2) | 8453(2) | -123(1)  | 33(1)          |
| C(5)  | 3715(2) | 7316(1) | 340(1)   | 25(1)          |
| C(6)  | 3290(2) | 6037(1) | 1001(1)  | 26(1)          |
| C(7)  | 3001(2) | 7063(1) | 2910(1)  | 23(1)          |
| C(8)  | 4764(2) | 7112(2) | 2607(1)  | 27(1)          |
| C(9)  | 5757(2) | 7611(2) | 3172(1)  | 32(1)          |
| C(10) | 5011(2) | 8052(2) | 4060(1)  | 35(1)          |
| C(11) | 3267(2) | 8017(2) | 4379(1)  | 34(1)          |
| C(12) | 2250(2) | 7541(2) | 3815(1)  | 28(1)          |
| C(13) | 350(2)  | 7613(2) | 4214(1)  | 41(1)          |
| C(14) | 1211(2) | 4687(2) | 2339(1)  | 25(1)          |
| C(15) | -289(2) | 4704(2) | 1913(1)  | 32(1)          |
| C(16) | -864(2) | 3353(2) | 1941(1)  | 40(1)          |
| C(17) | 20(2)   | 1968(2) | 2405(1)  | 43(1)          |
| C(18) | 1505(2) | 1923(2) | 2839(1)  | 36(1)          |
| C(19) | 2115(2) | 3260(2) | 2802(1)  | 27(1)          |
| C(20) | 3754(2) | 3107(2) | 3267(1)  | 35(1)          |
| F(1)  | -252(1) | 6516(1) | 3914(1)  | 44(1)          |
| F(2)  | 161(2)  | 7440(3) | 5133(1)  | 92(1)          |
| F(3)  | -830(2) | 9017(2) | 3988(1)  | 77(1)          |
| F(4)  | 3382(2) | 3934(1) | 4030(1)  | 50(1)          |
| F(5)  | 4999(1) | 3628(1) | 2695(1)  | 46(1)          |
| F(6)  | 4583(2) | 1604(1) | 3537(1)  | 59(1)          |

Table 3. Bond lengths [ $\text{\AA}$ ] and angles [ $^\circ$ ] for rpsl32.

---

|             |            |
|-------------|------------|
| P(1)-O(2)   | 1.4822(9)  |
| P(1)-C(7)   | 1.8177(12) |
| P(1)-C(6)   | 1.8180(13) |
| P(1)-C(14)  | 1.8325(13) |
| O(1)-N(1)   | 1.3064(14) |
| N(1)-C(1)   | 1.3591(17) |
| N(1)-C(5)   | 1.3682(17) |
| C(1)-C(2)   | 1.371(2)   |
| C(1)-H(1A)  | 0.9400     |
| C(2)-C(3)   | 1.381(3)   |
| C(2)-H(2)   | 0.9400     |
| C(3)-C(4)   | 1.383(2)   |
| C(3)-H(3)   | 0.9400     |
| C(4)-C(5)   | 1.3883(17) |
| C(4)-H(4)   | 0.9400     |
| C(5)-C(6)   | 1.4885(17) |
| C(6)-H(6A)  | 0.9800     |
| C(6)-H(6B)  | 0.9800     |
| C(7)-C(8)   | 1.3970(17) |
| C(7)-C(12)  | 1.4089(17) |
| C(8)-C(9)   | 1.3905(18) |
| C(8)-H(8)   | 0.9400     |
| C(9)-C(10)  | 1.377(2)   |
| C(9)-H(9)   | 0.9400     |
| C(10)-C(11) | 1.384(2)   |
| C(10)-H(10) | 0.9400     |
| C(11)-C(12) | 1.3911(19) |
| C(11)-H(11) | 0.9400     |
| C(12)-C(13) | 1.499(2)   |
| C(13)-F(2)  | 1.319(2)   |
| C(13)-F(1)  | 1.3284(19) |
| C(13)-F(3)  | 1.346(2)   |
| C(14)-C(15) | 1.3976(18) |
| C(14)-C(19) | 1.4028(17) |

|             |            |
|-------------|------------|
| C(15)-C(16) | 1.389(2)   |
| C(15)-H(15) | 0.9400     |
| C(16)-C(17) | 1.373(3)   |
| C(16)-H(16) | 0.9400     |
| C(17)-C(18) | 1.388(2)   |
| C(17)-H(17) | 0.9400     |
| C(18)-C(19) | 1.3923(19) |
| C(18)-H(18) | 0.9400     |
| C(19)-C(20) | 1.498(2)   |
| C(20)-F(4)  | 1.3345(18) |
| C(20)-F(6)  | 1.3354(16) |
| C(20)-F(5)  | 1.3438(19) |

|                 |            |
|-----------------|------------|
| O(2)-P(1)-C(7)  | 110.83(6)  |
| O(2)-P(1)-C(6)  | 112.74(6)  |
| C(7)-P(1)-C(6)  | 108.69(6)  |
| O(2)-P(1)-C(14) | 110.77(6)  |
| C(7)-P(1)-C(14) | 115.13(5)  |
| C(6)-P(1)-C(14) | 98.13(6)   |
| O(1)-N(1)-C(1)  | 118.71(12) |
| O(1)-N(1)-C(5)  | 120.83(11) |
| C(1)-N(1)-C(5)  | 120.43(11) |
| N(1)-C(1)-C(2)  | 120.94(14) |
| N(1)-C(1)-H(1A) | 119.5      |
| C(2)-C(1)-H(1A) | 119.5      |
| C(1)-C(2)-C(3)  | 120.29(13) |
| C(1)-C(2)-H(2)  | 119.9      |
| C(3)-C(2)-H(2)  | 119.9      |
| C(2)-C(3)-C(4)  | 118.13(13) |
| C(2)-C(3)-H(3)  | 120.9      |
| C(4)-C(3)-H(3)  | 120.9      |
| C(3)-C(4)-C(5)  | 121.38(14) |
| C(3)-C(4)-H(4)  | 119.3      |
| C(5)-C(4)-H(4)  | 119.3      |
| N(1)-C(5)-C(4)  | 118.73(12) |
| N(1)-C(5)-C(6)  | 117.68(10) |



|                   |            |
|-------------------|------------|
| C(4)-C(5)-C(6)    | 123.17(12) |
| C(5)-C(6)-P(1)    | 119.53(8)  |
| C(5)-C(6)-H(6A)   | 107.4      |
| P(1)-C(6)-H(6A)   | 107.4      |
| C(5)-C(6)-H(6B)   | 107.4      |
| P(1)-C(6)-H(6B)   | 107.4      |
| H(6A)-C(6)-H(6B)  | 107.0      |
| C(8)-C(7)-C(12)   | 117.69(11) |
| C(8)-C(7)-P(1)    | 117.46(9)  |
| C(12)-C(7)-P(1)   | 124.58(10) |
| C(9)-C(8)-C(7)    | 121.70(12) |
| C(9)-C(8)-H(8)    | 119.2      |
| C(7)-C(8)-H(8)    | 119.2      |
| C(10)-C(9)-C(8)   | 119.81(13) |
| C(10)-C(9)-H(9)   | 120.1      |
| C(8)-C(9)-H(9)    | 120.1      |
| C(9)-C(10)-C(11)  | 119.74(13) |
| C(9)-C(10)-H(10)  | 120.1      |
| C(11)-C(10)-H(10) | 120.1      |
| C(10)-C(11)-C(12) | 120.99(12) |
| C(10)-C(11)-H(11) | 119.5      |
| C(12)-C(11)-H(11) | 119.5      |
| C(11)-C(12)-C(7)  | 120.06(12) |
| C(11)-C(12)-C(13) | 116.64(12) |
| C(7)-C(12)-C(13)  | 123.28(12) |
| F(2)-C(13)-F(1)   | 106.70(15) |
| F(2)-C(13)-F(3)   | 106.38(16) |
| F(1)-C(13)-F(3)   | 105.25(14) |
| F(2)-C(13)-C(12)  | 112.15(14) |
| F(1)-C(13)-C(12)  | 113.83(12) |
| F(3)-C(13)-C(12)  | 111.97(14) |
| C(15)-C(14)-C(19) | 117.82(12) |
| C(15)-C(14)-P(1)  | 110.74(9)  |
| C(19)-C(14)-P(1)  | 131.11(10) |
| C(16)-C(15)-C(14) | 121.37(14) |
| C(16)-C(15)-H(15) | 119.3      |

|                   |            |
|-------------------|------------|
| C(14)-C(15)-H(15) | 119.3      |
| C(17)-C(16)-C(15) | 120.30(14) |
| C(17)-C(16)-H(16) | 119.9      |
| C(15)-C(16)-H(16) | 119.9      |
| C(16)-C(17)-C(18) | 119.46(14) |
| C(16)-C(17)-H(17) | 120.3      |
| C(18)-C(17)-H(17) | 120.3      |
| C(17)-C(18)-C(19) | 120.81(14) |
| C(17)-C(18)-H(18) | 119.6      |
| C(19)-C(18)-H(18) | 119.6      |
| C(18)-C(19)-C(14) | 120.23(13) |
| C(18)-C(19)-C(20) | 117.68(12) |
| C(14)-C(19)-C(20) | 122.10(11) |
| F(4)-C(20)-F(6)   | 106.21(12) |
| F(4)-C(20)-F(5)   | 106.52(13) |
| F(6)-C(20)-F(5)   | 105.97(13) |
| F(4)-C(20)-C(19)  | 112.93(13) |
| F(6)-C(20)-C(19)  | 112.89(12) |
| F(5)-C(20)-C(19)  | 111.80(11) |

---

Table 4. Anisotropic displacement parameters ( $\text{\AA}^2 \times 10^3$ ) for rpsl32. The anisotropic displacement factor exponent takes the form:  $-2\pi^2 [ h^2 a^{*2} U^{11} + \dots + 2 h k a^* b^* U^{12} ]$

|       | U <sup>11</sup> | U <sup>22</sup> | U <sup>33</sup> | U <sup>23</sup> | U <sup>13</sup> | U <sup>12</sup> |
|-------|-----------------|-----------------|-----------------|-----------------|-----------------|-----------------|
| P(1)  | 24(1)           | 21(1)           | 21(1)           | 0(1)            | -5(1)           | -4(1)           |
| O(1)  | 30(1)           | 40(1)           | 27(1)           | -1(1)           | -8(1)           | -1(1)           |
| O(2)  | 30(1)           | 27(1)           | 35(1)           | 0(1)            | -10(1)          | 0(1)            |
| N(1)  | 30(1)           | 26(1)           | 20(1)           | -3(1)           | -3(1)           | -5(1)           |
| C(1)  | 41(1)           | 33(1)           | 26(1)           | -3(1)           | 4(1)            | -12(1)          |
| C(2)  | 59(1)           | 29(1)           | 26(1)           | 3(1)            | 1(1)            | -11(1)          |
| C(3)  | 53(1)           | 30(1)           | 28(1)           | 5(1)            | -9(1)           | 0(1)            |
| C(4)  | 35(1)           | 32(1)           | 28(1)           | 2(1)            | -8(1)           | -1(1)           |
| C(5)  | 30(1)           | 24(1)           | 19(1)           | -2(1)           | -4(1)           | -4(1)           |
| C(6)  | 32(1)           | 23(1)           | 21(1)           | -1(1)           | -4(1)           | -6(1)           |
| C(7)  | 27(1)           | 22(1)           | 20(1)           | -1(1)           | -4(1)           | -6(1)           |
| C(8)  | 27(1)           | 29(1)           | 23(1)           | -1(1)           | -4(1)           | -8(1)           |
| C(9)  | 30(1)           | 35(1)           | 33(1)           | 0(1)            | -10(1)          | -11(1)          |
| C(10) | 41(1)           | 36(1)           | 31(1)           | -2(1)           | -13(1)          | -13(1)          |
| C(11) | 43(1)           | 38(1)           | 24(1)           | -6(1)           | -5(1)           | -13(1)          |
| C(12) | 32(1)           | 29(1)           | 23(1)           | -3(1)           | -2(1)           | -9(1)           |
| C(13) | 41(1)           | 53(1)           | 32(1)           | -14(1)          | 7(1)            | -18(1)          |
| C(14) | 25(1)           | 26(1)           | 24(1)           | -2(1)           | -3(1)           | -8(1)           |
| C(15) | 27(1)           | 35(1)           | 36(1)           | -5(1)           | -6(1)           | -9(1)           |
| C(16) | 32(1)           | 48(1)           | 46(1)           | -10(1)          | -2(1)           | -20(1)          |
| C(17) | 48(1)           | 44(1)           | 44(1)           | -6(1)           | 4(1)            | -28(1)          |
| C(18) | 47(1)           | 30(1)           | 31(1)           | 2(1)            | 1(1)            | -17(1)          |
| C(19) | 32(1)           | 26(1)           | 23(1)           | 1(1)            | -2(1)           | -9(1)           |
| C(20) | 43(1)           | 26(1)           | 36(1)           | 7(1)            | -15(1)          | -8(1)           |
| F(1)  | 38(1)           | 54(1)           | 44(1)           | -11(1)          | 4(1)            | -22(1)          |
| F(2)  | 85(1)           | 189(2)          | 28(1)           | -27(1)          | 19(1)           | -85(1)          |
| F(3)  | 40(1)           | 52(1)           | 125(1)          | -24(1)          | 19(1)           | -2(1)           |
| F(4)  | 69(1)           | 48(1)           | 38(1)           | 0(1)            | -24(1)          | -15(1)          |
| F(5)  | 32(1)           | 47(1)           | 60(1)           | 9(1)            | -13(1)          | -12(1)          |
| F(6)  | 71(1)           | 28(1)           | 79(1)           | 15(1)           | -40(1)          | -7(1)           |

Table 5. Hydrogen coordinates ( $\times 10^4$ ) and isotropic displacement parameters ( $\text{\AA}^2 \times 10^3$ ) for rpsl32.

|       | x     | y     | z     | U(eq) |
|-------|-------|-------|-------|-------|
| H(1A) | 7217  | 8145  | -770  | 40    |
| H(2)  | 5084  | 9992  | -1562 | 48    |
| H(3)  | 2022  | 10255 | -1133 | 48    |
| H(4)  | 1196  | 8526  | 47    | 40    |
| H(6A) | 4436  | 5330  | 1182  | 31    |
| H(6B) | 2782  | 5411  | 656   | 31    |
| H(8)  | 5292  | 6798  | 2005  | 32    |
| H(9)  | 6935  | 7648  | 2949  | 38    |
| H(10) | 5683  | 8376  | 4448  | 42    |
| H(11) | 2762  | 8318  | 4985  | 41    |
| H(15) | -921  | 5648  | 1602  | 38    |
| H(16) | -1863 | 3388  | 1640  | 48    |
| H(17) | -376  | 1057  | 2429  | 51    |
| H(18) | 2106  | 979   | 3162  | 43    |

Table 6. Torsion angles [°] for rpsl32.

---

|                         |             |
|-------------------------|-------------|
| O(1)-N(1)-C(1)-C(2)     | 179.93(12)  |
| C(5)-N(1)-C(1)-C(2)     | 2.11(19)    |
| N(1)-C(1)-C(2)-C(3)     | 0.6(2)      |
| C(1)-C(2)-C(3)-C(4)     | -2.0(2)     |
| C(2)-C(3)-C(4)-C(5)     | 0.9(2)      |
| O(1)-N(1)-C(5)-C(4)     | 179.00(11)  |
| C(1)-N(1)-C(5)-C(4)     | -3.21(18)   |
| O(1)-N(1)-C(5)-C(6)     | -8.14(16)   |
| C(1)-N(1)-C(5)-C(6)     | 169.65(11)  |
| C(3)-C(4)-C(5)-N(1)     | 1.7(2)      |
| C(3)-C(4)-C(5)-C(6)     | -170.72(13) |
| N(1)-C(5)-C(6)-P(1)     | 124.22(10)  |
| C(4)-C(5)-C(6)-P(1)     | -63.27(15)  |
| O(2)-P(1)-C(6)-C(5)     | 45.19(12)   |
| C(7)-P(1)-C(6)-C(5)     | -78.10(11)  |
| C(14)-P(1)-C(6)-C(5)    | 161.82(10)  |
| O(2)-P(1)-C(7)-C(8)     | -118.67(10) |
| C(6)-P(1)-C(7)-C(8)     | 5.75(11)    |
| C(14)-P(1)-C(7)-C(8)    | 114.64(10)  |
| O(2)-P(1)-C(7)-C(12)    | 55.17(12)   |
| C(6)-P(1)-C(7)-C(12)    | 179.60(10)  |
| C(14)-P(1)-C(7)-C(12)   | -71.52(12)  |
| C(12)-C(7)-C(8)-C(9)    | 0.03(18)    |
| P(1)-C(7)-C(8)-C(9)     | 174.31(10)  |
| C(7)-C(8)-C(9)-C(10)    | 0.9(2)      |
| C(8)-C(9)-C(10)-C(11)   | -0.9(2)     |
| C(9)-C(10)-C(11)-C(12)  | 0.0(2)      |
| C(10)-C(11)-C(12)-C(7)  | 1.0(2)      |
| C(10)-C(11)-C(12)-C(13) | -177.45(14) |
| C(8)-C(7)-C(12)-C(11)   | -0.97(18)   |
| P(1)-C(7)-C(12)-C(11)   | -174.80(10) |
| C(8)-C(7)-C(12)-C(13)   | 177.35(13)  |
| P(1)-C(7)-C(12)-C(13)   | 3.52(19)    |
| C(11)-C(12)-C(13)-F(2)  | -27.7(2)    |

|                         |             |
|-------------------------|-------------|
| C(7)-C(12)-C(13)-F(2)   | 153.88(16)  |
| C(11)-C(12)-C(13)-F(1)  | -149.02(14) |
| C(7)-C(12)-C(13)-F(3)   | 32.6(2)     |
| C(11)-C(12)-C(13)-F(2)  | 91.75(17)   |
| C(7)-C(12)-C(13)-F(1)   | -86.62(17)  |
| O(2)-P(1)-C(14)-C(15)   | 29.00(11)   |
| C(7)-P(1)-C(14)-C(15)   | 155.72(9)   |
| C(6)-P(1)-C(14)-C(15)   | -89.15(10)  |
| O(2)-P(1)-C(14)-C(19)   | -157.91(12) |
| C(7)-P(1)-C(14)-C(19)   | -31.19(14)  |
| C(6)-P(1)-C(14)-C(19)   | 83.94(13)   |
| C(19)-C(14)-C(15)-C(16) | -0.4(2)     |
| P(1)-C(14)-C(15)-C(16)  | 173.68(12)  |
| C(14)-C(15)-C(16)-C(17) | 1.1(2)      |
| C(15)-C(16)-C(17)-C(18) | -0.6(2)     |
| C(16)-C(17)-C(18)-C(19) | -0.6(2)     |
| C(17)-C(18)-C(19)-C(14) | 1.2(2)      |
| C(17)-C(18)-C(19)-C(20) | -178.48(14) |
| C(15)-C(14)-C(19)-C(18) | -0.72(19)   |
| P(1)-C(14)-C(19)-C(18)  | -173.41(11) |
| C(15)-C(14)-C(19)-C(20) | 178.97(13)  |
| P(1)-C(14)-C(19)-C(20)  | 6.3(2)      |
| C(18)-C(19)-C(20)-F(4)  | -110.65(14) |
| C(14)-C(19)-C(20)-F(4)  | 69.64(17)   |
| C(18)-C(19)-C(20)-F(6)  | 9.85(19)    |
| C(14)-C(19)-C(20)-F(6)  | -169.86(13) |
| C(18)-C(19)-C(20)-F(5)  | 129.23(13)  |
| C(14)-C(19)-C(20)-F(5)  | -50.48(18)  |

---

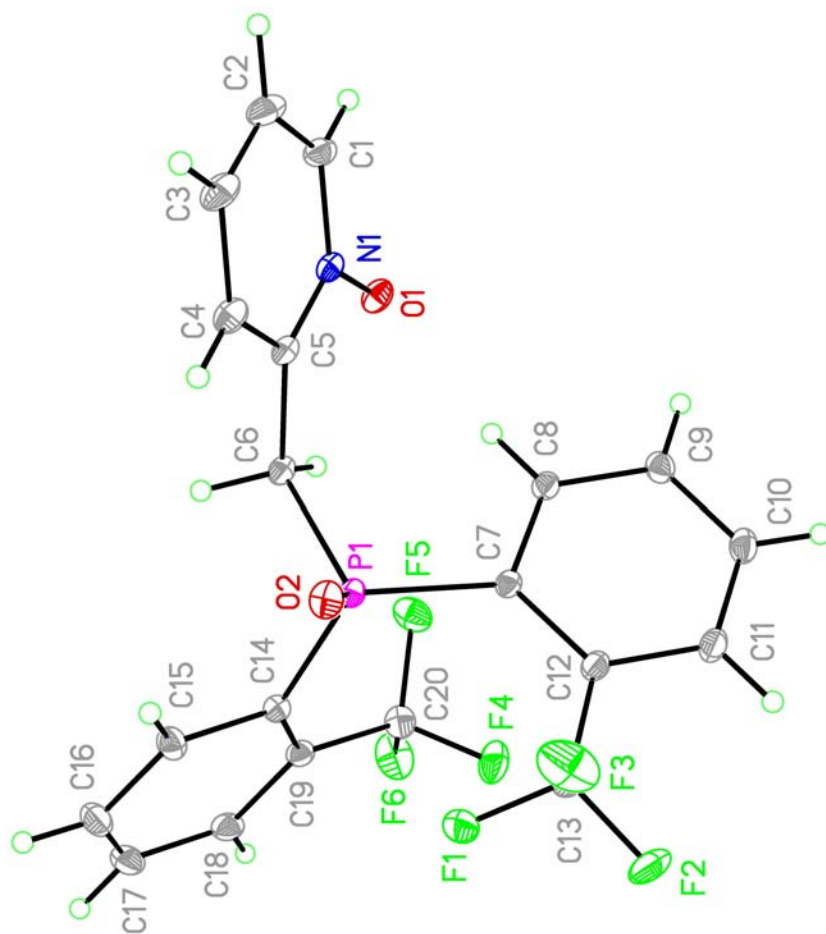

Figure 1. rpsl3211.jpg, Single molecule view, 20% thermal displacement ellipsoids 20%,  
rpsl3211b.jpg=b/w

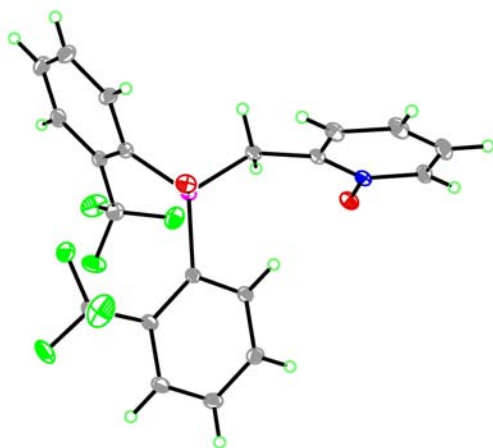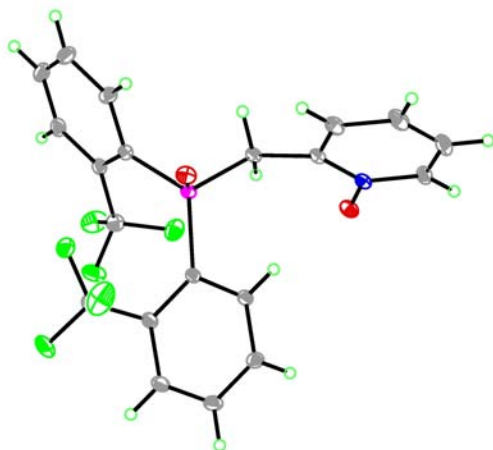

Figure 2.rpsl32s1.jpg also rpsl32s1b.jpg[b/w], stereoview of single molecule.



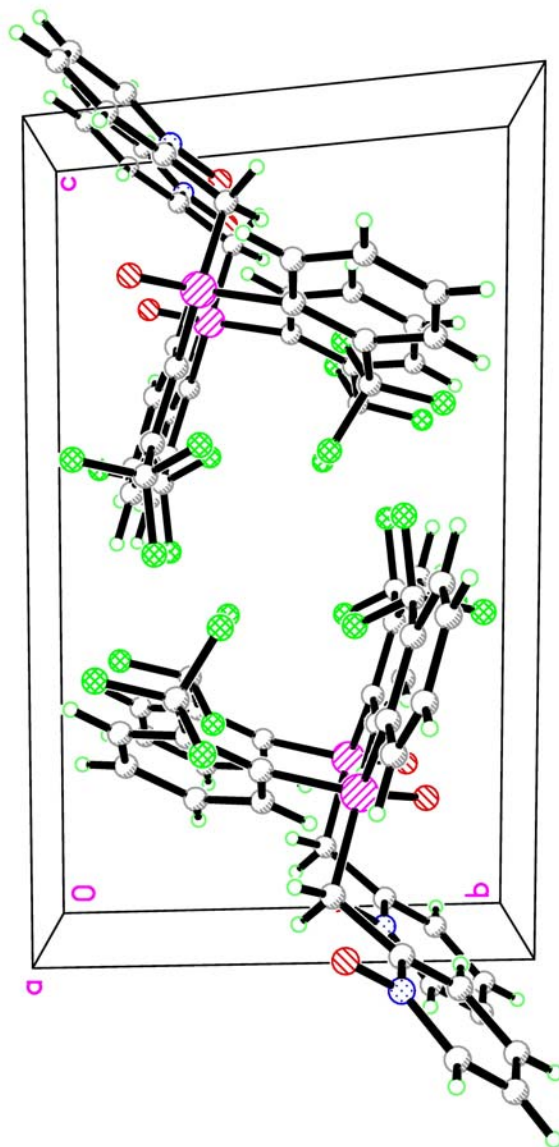

Figure 3.rpsl32al.jpg packing view down a-axis,color,also rpsl32alb.jpg b/w

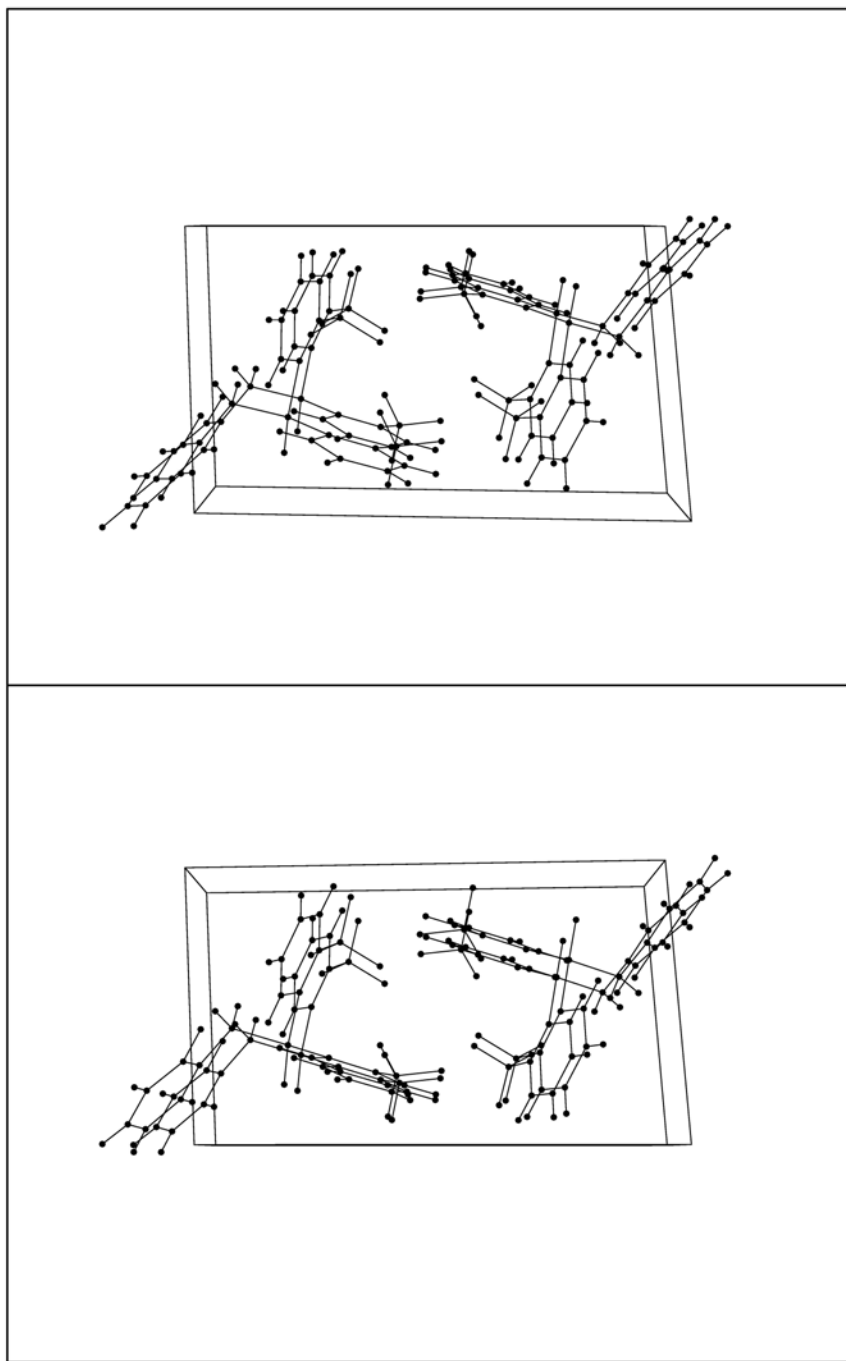

Figure 4.rpsl32asb.jpg stereoview packing, down a-axis

X-ray Crystallographic data for **3d**.

# Crystal Structure Report

Prepared for:

Professor R. T. Paine/ Sylvie Pailloux  
rtpaine@unm.edu, spailou@unm.edu

Compound:

Rps20/slp-11-39-L1  
C<sub>22</sub> H<sub>12</sub> F<sub>12</sub> N O P

Prepared by:

Eileen Duesler

[Duesler@unm.edu](mailto:Duesler@unm.edu)

277-6649

Issue date:

January 18, 2007

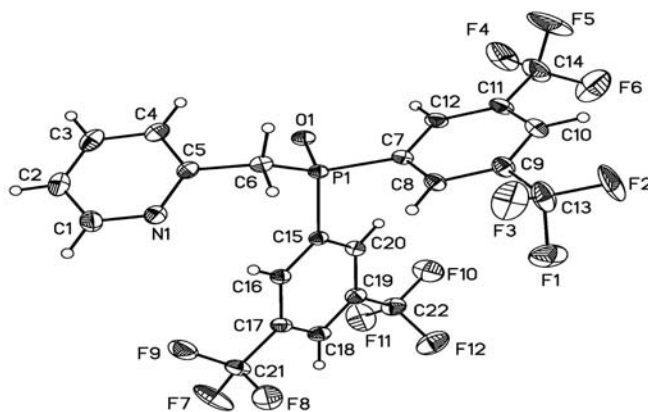

Rpsl2011b.jpg \$257 = \$225 + 2[46\*-30] \*includes disordered F's

Table 1. Crystal data and structure refinement for rpsl20a.

|                                   |                                                       |                  |
|-----------------------------------|-------------------------------------------------------|------------------|
| Identification code               | rpsl20a                                               |                  |
| Empirical formula                 | C <sub>22</sub> H <sub>12</sub> F <sub>12</sub> N O P |                  |
| Formula weight                    | 565.30                                                |                  |
| Temperature                       | 223(2) K                                              |                  |
| Wavelength                        | 0.71073 Å                                             |                  |
| Crystal system                    | Monoclinic                                            |                  |
| Space group                       | P2(1)/c                                               |                  |
| Unit cell dimensions              | a = 11.6362(12) Å                                     | α = 90°.         |
|                                   | b = 19.362(3) Å                                       | β = 104.192(6)°. |
|                                   | c = 10.6850(13) Å                                     | γ = 90°.         |
| Volume                            | 2333.9(5) Å <sup>3</sup>                              |                  |
| Z                                 | 4                                                     |                  |
| Density (calculated)              | 1.609 Mg/m <sup>3</sup>                               |                  |
| Absorption coefficient            | 0.230 mm <sup>-1</sup>                                |                  |
| F(000)                            | 1128                                                  |                  |
| Crystal size                      | 0.46 x 0.44 x 0.28 mm <sup>3</sup>                    |                  |
| Theta range for data collection   | 2.09 to 29.13°.                                       |                  |
| Index ranges                      | -15 ≤ h ≤ 15, -26 ≤ k ≤ 26, -14 ≤ l ≤ 14              |                  |
| Reflections collected             | 32662                                                 |                  |
| Independent reflections           | 6258 [R(int) = 0.0172]                                |                  |
| Completeness to theta = 29.13°    | 99.6 %                                                |                  |
| Absorption correction             | Semi-empirical from equivalents                       |                  |
| Max. and min. transmission        | 0.93 and 0.90                                         |                  |
| Refinement method                 | Full-matrix least-squares on F <sup>2</sup>           |                  |
| Data / restraints / parameters    | 6258 / 0 / 415                                        |                  |
| Goodness-of-fit on F <sup>2</sup> | 0.987                                                 |                  |
| Final R indices [I > 2σ(I)]       | R1 = 0.0537, wR2 = 0.1970                             |                  |
| R indices (all data)              | R1 = 0.0687, wR2 = 0.2327                             |                  |
| Largest diff. peak and hole       | 0.634 and -0.272 e.Å <sup>-3</sup>                    |                  |

Table 2. Atomic coordinates ( $\times 10^4$ ) and equivalent isotropic displacement parameters ( $\text{\AA}^2 \times 10^3$ ) for rpsl20a.  $U(\text{eq})$  is defined as one third of the trace of the orthogonalized  $U^{ij}$  tensor.

|       | x       | y        | z        | U(eq)  |
|-------|---------|----------|----------|--------|
| P(1)  | 4117(1) | 2536(1)  | 4257(1)  | 33(1)  |
| O(1)  | 4205(1) | 2467(1)  | 2898(1)  | 44(1)  |
| N(1)  | 5760(2) | 1112(1)  | 6114(2)  | 52(1)  |
| C(1)  | 6651(2) | 674(1)   | 6096(3)  | 61(1)  |
| C(2)  | 6765(2) | 331(1)   | 5001(3)  | 64(1)  |
| C(3)  | 5942(2) | 439(1)   | 3889(3)  | 64(1)  |
| C(4)  | 5019(2) | 900(1)   | 3862(2)  | 53(1)  |
| C(5)  | 4962(2) | 1224(1)  | 5003(2)  | 41(1)  |
| C(6)  | 3985(1) | 1729(1)  | 5059(2)  | 40(1)  |
| C(7)  | 2803(1) | 3036(1)  | 4292(2)  | 38(1)  |
| C(8)  | 2442(1) | 3176(1)  | 5406(2)  | 42(1)  |
| C(9)  | 1408(2) | 3551(1)  | 5321(2)  | 49(1)  |
| C(10) | 745(2)  | 3794(1)  | 4156(2)  | 53(1)  |
| C(11) | 1133(2) | 3669(1)  | 3052(2)  | 54(1)  |
| C(12) | 2150(2) | 3290(1)  | 3115(2)  | 47(1)  |
| C(13) | 1033(2) | 3705(2)  | 6545(3)  | 80(1)  |
| F(1)  | 1938(3) | 4112(3)  | 7398(4)  | 100(1) |
| F(2)  | 109(5)  | 4080(5)  | 6437(7)  | 128(3) |
| F(3)  | 1025(7) | 3191(3)  | 7279(6)  | 115(2) |
| F(1A) | 1659(8) | 3527(8)  | 7501(6)  | 130(4) |
| F(2A) | 85(12)  | 3224(7)  | 6477(13) | 191(5) |
| F(3A) | 504(13) | 4253(8)  | 6480(12) | 168(7) |
| C(14) | 484(3)  | 3978(3)  | 1782(3)  | 103(1) |
| F(4)  | 934(7)  | 3855(6)  | 843(6)   | 115(3) |
| F(5)  | -585(6) | 3662(8)  | 1395(7)  | 160(4) |
| F(6)  | 209(18) | 4613(5)  | 1868(8)  | 215(7) |
| F(4A) | -528(6) | 4182(7)  | 1742(9)  | 139(4) |
| F(5A) | 1097(7) | 4559(7)  | 1548(10) | 163(5) |
| F(6A) | 437(15) | 3537(11) | 864(10)  | 244(8) |
| C(15) | 5359(1) | 3006(1)  | 5235(2)  | 34(1)  |
| C(16) | 6068(1) | 2749(1)  | 6372(2)  | 37(1)  |

|       |         |         |         |        |
|-------|---------|---------|---------|--------|
| C(17) | 7050(1) | 3128(1) | 7025(2) | 42(1)  |
| C(18) | 7305(2) | 3758(1) | 6572(2) | 46(1)  |
| C(19) | 6580(2) | 4018(1) | 5448(2) | 45(1)  |
| C(20) | 5613(1) | 3639(1) | 4751(2) | 41(1)  |
| C(21) | 7829(2) | 2833(1) | 8240(2) | 57(1)  |
| F(7)  | 8924(4) | 2950(5) | 8465(7) | 109(3) |
| F(8)  | 7468(8) | 3004(5) | 9290(7) | 106(3) |
| F(9)  | 7726(5) | 2120(2) | 8343(6) | 96(2)  |
| F(7A) | 7328(6) | 2765(6) | 9114(7) | 123(4) |
| F(8A) | 8360(7) | 2306(4) | 7976(6) | 132(3) |
| F(9A) | 8715(6) | 3288(4) | 8689(7) | 121(3) |
| C(22) | 6854(2) | 4707(1) | 4985(3) | 62(1)  |
| F(10) | 6049(2) | 4931(1) | 3958(2) | 100(1) |
| F(11) | 7876(2) | 4723(1) | 4666(2) | 105(1) |
| F(12) | 6886(2) | 5196(1) | 5873(2) | 107(1) |

---

Table 3. Bond lengths [ $\text{\AA}$ ] and angles [ $^\circ$ ] for rpsl20a.

---

|             |            |
|-------------|------------|
| P(1)-O(1)   | 1.4874(14) |
| P(1)-C(15)  | 1.8070(15) |
| P(1)-C(6)   | 1.8077(18) |
| P(1)-C(7)   | 1.8178(17) |
| N(1)-C(5)   | 1.334(3)   |
| N(1)-C(1)   | 1.344(3)   |
| C(1)-C(2)   | 1.379(4)   |
| C(1)-H(1)   | 0.9400     |
| C(2)-C(3)   | 1.347(4)   |
| C(2)-H(2)   | 0.9400     |
| C(3)-C(4)   | 1.392(3)   |
| C(3)-H(3)   | 0.9400     |
| C(4)-C(5)   | 1.387(3)   |
| C(4)-H(4)   | 0.9400     |
| C(5)-C(6)   | 1.510(2)   |
| C(6)-H(6A)  | 0.9800     |
| C(6)-H(6B)  | 0.9800     |
| C(7)-C(8)   | 1.383(2)   |
| C(7)-C(12)  | 1.389(2)   |
| C(8)-C(9)   | 1.389(2)   |
| C(8)-H(8)   | 0.9400     |
| C(9)-C(10)  | 1.376(3)   |
| C(9)-C(13)  | 1.506(3)   |
| C(10)-C(11) | 1.384(3)   |
| C(10)-H(10) | 0.9400     |
| C(11)-C(12) | 1.380(3)   |
| C(11)-C(14) | 1.507(4)   |
| C(12)-H(12) | 0.9400     |
| C(13)-F(1A) | 1.152(7)   |
| C(13)-F(3A) | 1.221(12)  |
| C(13)-F(3)  | 1.269(5)   |
| C(13)-F(2)  | 1.279(5)   |
| C(13)-F(2A) | 1.432(10)  |
| C(13)-F(1)  | 1.446(6)   |

|                 |           |
|-----------------|-----------|
| C(14)-F(4A)     | 1.233(7)  |
| C(14)-F(4)      | 1.263(8)  |
| C(14)-F(6)      | 1.279(8)  |
| C(14)-F(6A)     | 1.292(12) |
| C(14)-F(5)      | 1.356(9)  |
| C(14)-F(5A)     | 1.387(10) |
| C(15)-C(16)     | 1.383(2)  |
| C(15)-C(20)     | 1.390(2)  |
| C(16)-C(17)     | 1.393(2)  |
| C(16)-H(16)     | 0.9400    |
| C(17)-C(18)     | 1.372(3)  |
| C(17)-C(21)     | 1.501(3)  |
| C(18)-C(19)     | 1.382(3)  |
| C(18)-H(18)     | 0.9400    |
| C(19)-C(20)     | 1.396(2)  |
| C(19)-C(22)     | 1.484(3)  |
| C(20)-H(20)     | 0.9400    |
| C(21)-F(7A)     | 1.224(6)  |
| C(21)-F(7)      | 1.259(5)  |
| C(21)-F(8A)     | 1.260(6)  |
| C(21)-F(8)      | 1.333(7)  |
| C(21)-F(9A)     | 1.352(7)  |
| C(21)-F(9)      | 1.394(5)  |
| C(22)-F(11)     | 1.315(3)  |
| C(22)-F(10)     | 1.328(3)  |
| C(22)-F(12)     | 1.334(3)  |
| O(1)-P(1)-C(15) | 111.91(7) |
| O(1)-P(1)-C(6)  | 114.72(8) |
| C(15)-P(1)-C(6) | 108.08(8) |
| O(1)-P(1)-C(7)  | 109.15(8) |
| C(15)-P(1)-C(7) | 106.12(7) |
| C(6)-P(1)-C(7)  | 106.37(8) |
| C(5)-N(1)-C(1)  | 117.5(2)  |
| N(1)-C(1)-C(2)  | 123.4(2)  |
| N(1)-C(1)-H(1)  | 118.3     |



|                   |            |
|-------------------|------------|
| C(2)-C(1)-H(1)    | 118.3      |
| C(3)-C(2)-C(1)    | 118.6(2)   |
| C(3)-C(2)-H(2)    | 120.7      |
| C(1)-C(2)-H(2)    | 120.7      |
| C(2)-C(3)-C(4)    | 119.7(2)   |
| C(2)-C(3)-H(3)    | 120.2      |
| C(4)-C(3)-H(3)    | 120.2      |
| C(5)-C(4)-C(3)    | 118.4(2)   |
| C(5)-C(4)-H(4)    | 120.8      |
| C(3)-C(4)-H(4)    | 120.8      |
| N(1)-C(5)-C(4)    | 122.38(18) |
| N(1)-C(5)-C(6)    | 115.93(16) |
| C(4)-C(5)-C(6)    | 121.69(18) |
| C(5)-C(6)-P(1)    | 112.88(11) |
| C(5)-C(6)-H(6A)   | 109.0      |
| P(1)-C(6)-H(6A)   | 109.0      |
| C(5)-C(6)-H(6B)   | 109.0      |
| P(1)-C(6)-H(6B)   | 109.0      |
| H(6A)-C(6)-H(6B)  | 107.8      |
| C(8)-C(7)-C(12)   | 119.77(16) |
| C(8)-C(7)-P(1)    | 123.78(13) |
| C(12)-C(7)-P(1)   | 116.45(14) |
| C(7)-C(8)-C(9)    | 119.10(17) |
| C(7)-C(8)-H(8)    | 120.4      |
| C(9)-C(8)-H(8)    | 120.4      |
| C(10)-C(9)-C(8)   | 121.49(19) |
| C(10)-C(9)-C(13)  | 119.99(18) |
| C(8)-C(9)-C(13)   | 118.50(19) |
| C(9)-C(10)-C(11)  | 118.92(17) |
| C(9)-C(10)-H(10)  | 120.5      |
| C(11)-C(10)-H(10) | 120.5      |
| C(12)-C(11)-C(10) | 120.42(18) |
| C(12)-C(11)-C(14) | 119.3(2)   |
| C(10)-C(11)-C(14) | 120.2(2)   |
| C(11)-C(12)-C(7)  | 120.25(18) |
| C(11)-C(12)-H(12) | 119.9      |

|                   |            |
|-------------------|------------|
| C(7)-C(12)-H(12)  | 119.9      |
| F(1A)-C(13)-F(3A) | 120.7(9)   |
| F(3)-C(13)-F(2)   | 111.6(5)   |
| F(1A)-C(13)-F(2A) | 99.4(8)    |
| F(3A)-C(13)-F(2A) | 101.0(9)   |
| F(3)-C(13)-F(1)   | 98.7(4)    |
| F(2)-C(13)-F(1)   | 102.3(5)   |
| F(1A)-C(13)-C(9)  | 117.1(3)   |
| F(3A)-C(13)-C(9)  | 111.8(6)   |
| F(3)-C(13)-C(9)   | 115.4(3)   |
| F(2)-C(13)-C(9)   | 116.8(4)   |
| F(2A)-C(13)-C(9)  | 102.2(5)   |
| F(1)-C(13)-C(9)   | 109.5(2)   |
| F(4)-C(14)-F(6)   | 113.5(9)   |
| F(4A)-C(14)-F(6A) | 108.9(7)   |
| F(4)-C(14)-F(5)   | 101.5(6)   |
| F(6A)-C(14)-F(5A) | 109.1(10)  |
| F(4A)-C(14)-C(11) | 115.0(5)   |
| F(4)-C(14)-C(11)  | 115.2(4)   |
| F(6)-C(14)-C(11)  | 113.3(4)   |
| F(6A)-C(14)-C(11) | 109.9(7)   |
| F(5)-C(14)-C(11)  | 108.4(6)   |
| F(5A)-C(14)-C(11) | 108.5(4)   |
| C(16)-C(15)-C(20) | 120.52(15) |
| C(16)-C(15)-P(1)  | 123.16(13) |
| C(20)-C(15)-P(1)  | 116.24(13) |
| C(15)-C(16)-C(17) | 119.37(17) |
| C(15)-C(16)-H(16) | 120.3      |
| C(17)-C(16)-H(16) | 120.3      |
| C(18)-C(17)-C(16) | 120.87(16) |
| C(18)-C(17)-C(21) | 120.41(16) |
| C(16)-C(17)-C(21) | 118.72(18) |
| C(17)-C(18)-C(19) | 119.49(15) |
| C(17)-C(18)-H(18) | 120.3      |
| C(19)-C(18)-H(18) | 120.3      |
| C(18)-C(19)-C(20) | 120.78(17) |

|                   |            |
|-------------------|------------|
| C(18)-C(19)-C(22) | 118.81(17) |
| C(20)-C(19)-C(22) | 120.40(19) |
| C(15)-C(20)-C(19) | 118.90(17) |
| C(15)-C(20)-H(20) | 120.6      |
| C(19)-C(20)-H(20) | 120.6      |
| F(7A)-C(21)-F(8A) | 115.7(7)   |
| F(7)-C(21)-F(8)   | 107.9(6)   |
| F(7A)-C(21)-F(9A) | 105.3(6)   |
| F(8A)-C(21)-F(9A) | 103.5(5)   |
| F(7)-C(21)-F(9)   | 105.4(5)   |
| F(7A)-C(21)-C(17) | 113.7(4)   |
| F(7)-C(21)-C(17)  | 117.7(4)   |
| F(8A)-C(21)-C(17) | 109.9(3)   |
| F(8)-C(21)-C(17)  | 112.7(4)   |
| F(9A)-C(21)-C(17) | 107.8(4)   |
| F(9)-C(21)-C(17)  | 113.6(2)   |
| F(11)-C(22)-F(10) | 106.2(2)   |
| F(11)-C(22)-F(12) | 107.4(2)   |
| F(10)-C(22)-F(12) | 104.3(2)   |
| F(11)-C(22)-C(19) | 112.9(2)   |
| F(10)-C(22)-C(19) | 113.71(17) |
| F(12)-C(22)-C(19) | 111.8(2)   |

---

Table 4. Anisotropic displacement parameters ( $\text{\AA}^2 \times 10^3$ ) for rpsl20a. The anisotropic displacement factor exponent takes the form:  $-2\pi^2 [ h^2 a^{*2} U^{11} + \dots + 2 h k a^* b^* U^{12} ]$

|       | U <sup>11</sup> | U <sup>22</sup> | U <sup>33</sup> | U <sup>23</sup> | U <sup>13</sup> | U <sup>12</sup> |
|-------|-----------------|-----------------|-----------------|-----------------|-----------------|-----------------|
| P(1)  | 34(1)           | 40(1)           | 27(1)           | -3(1)           | 8(1)            | -4(1)           |
| O(1)  | 48(1)           | 57(1)           | 28(1)           | -5(1)           | 11(1)           | -7(1)           |
| N(1)  | 56(1)           | 46(1)           | 51(1)           | -2(1)           | 11(1)           | 1(1)            |
| C(1)  | 58(1)           | 51(1)           | 72(2)           | 5(1)            | 11(1)           | 5(1)            |
| C(2)  | 66(1)           | 45(1)           | 90(2)           | 2(1)            | 33(1)           | 5(1)            |
| C(3)  | 80(1)           | 50(1)           | 76(2)           | -15(1)          | 43(1)           | -6(1)           |
| C(4)  | 67(1)           | 48(1)           | 49(1)           | -9(1)           | 23(1)           | -8(1)           |
| C(5)  | 48(1)           | 35(1)           | 45(1)           | -2(1)           | 17(1)           | -8(1)           |
| C(6)  | 43(1)           | 43(1)           | 37(1)           | -2(1)           | 14(1)           | -8(1)           |
| C(7)  | 33(1)           | 45(1)           | 33(1)           | -1(1)           | 4(1)            | -3(1)           |
| C(8)  | 37(1)           | 52(1)           | 37(1)           | 6(1)            | 9(1)            | 3(1)            |
| C(9)  | 40(1)           | 61(1)           | 50(1)           | 8(1)            | 17(1)           | 6(1)            |
| C(10) | 37(1)           | 61(1)           | 57(1)           | 7(1)            | 4(1)            | 5(1)            |
| C(11) | 40(1)           | 69(1)           | 44(1)           | 3(1)            | -6(1)           | 3(1)            |
| C(12) | 45(1)           | 60(1)           | 31(1)           | -5(1)           | 1(1)            | 0(1)            |
| C(13) | 71(1)           | 113(2)          | 68(2)           | 28(2)           | 40(1)           | 46(2)           |
| F(1)  | 98(2)           | 151(4)          | 57(2)           | -32(2)          | 29(2)           | -13(3)          |
| F(2)  | 78(2)           | 227(9)          | 86(3)           | 28(3)           | 35(2)           | 101(4)          |
| F(3)  | 172(6)          | 98(3)           | 107(4)          | 32(3)           | 96(5)           | 13(4)           |
| F(1A) | 104(6)          | 239(13)         | 56(3)           | 13(7)           | 34(4)           | 87(7)           |
| F(2A) | 212(10)         | 222(11)         | 204(11)         | -32(9)          | 175(10)         | -69(9)          |
| F(3A) | 269(16)         | 155(8)          | 125(8)          | 23(6)           | 134(10)         | 113(11)         |
| C(14) | 87(2)           | 151(4)          | 55(2)           | 0(2)            | -16(2)          | 47(2)           |
| F(4)  | 108(4)          | 188(9)          | 42(3)           | 45(5)           | 8(3)            | 54(4)           |
| F(5)  | 78(4)           | 294(12)         | 77(4)           | -4(6)           | -40(3)          | 7(6)            |
| F(6)  | 368(16)         | 114(6)          | 92(5)           | -8(5)           | -78(10)         | 131(9)          |
| F(4A) | 69(3)           | 234(12)         | 100(7)          | 58(7)           | -6(3)           | 66(5)           |
| F(5A) | 137(5)          | 210(10)         | 122(6)          | 117(8)          | -9(4)           | -23(5)          |
| F(6A) | 229(14)         | 358(19)         | 81(6)           | -84(8)          | -84(7)          | 148(12)         |
| C(15) | 33(1)           | 39(1)           | 32(1)           | -6(1)           | 11(1)           | -4(1)           |
| C(16) | 37(1)           | 43(1)           | 32(1)           | -4(1)           | 11(1)           | -3(1)           |

|       |        |         |        |        |        |        |
|-------|--------|---------|--------|--------|--------|--------|
| C(17) | 34(1)  | 56(1)   | 34(1)  | -8(1)  | 8(1)   | -2(1)  |
| C(18) | 38(1)  | 57(1)   | 46(1)  | -11(1) | 11(1)  | -12(1) |
| C(19) | 45(1)  | 42(1)   | 51(1)  | -3(1)  | 14(1)  | -10(1) |
| C(20) | 40(1)  | 43(1)   | 39(1)  | 1(1)   | 8(1)   | -2(1)  |
| C(21) | 44(1)  | 72(2)   | 47(1)  | -2(1)  | -3(1)  | -3(1)  |
| F(7)  | 32(1)  | 197(9)  | 90(4)  | 65(5)  | 0(2)   | -10(3) |
| F(8)  | 146(6) | 135(5)  | 38(2)  | -3(2)  | 23(3)  | 54(4)  |
| F(9)  | 108(3) | 64(2)   | 85(4)  | 20(2)  | -36(3) | -4(3)  |
| F(7A) | 61(2)  | 237(11) | 71(4)  | 89(6)  | 15(2)  | -7(4)  |
| F(8A) | 133(5) | 142(6)  | 89(4)  | -13(4) | -36(4) | 88(5)  |
| F(9A) | 89(4)  | 162(7)  | 75(3)  | 17(4)  | -49(3) | -54(4) |
| C(22) | 71(1)  | 47(1)   | 66(2)  | 1(1)   | 14(1)  | -18(1) |
| F(10) | 110(1) | 67(1)   | 108(1) | 34(1)  | -3(1)  | -24(1) |
| F(11) | 82(1)  | 91(1)   | 154(2) | 38(1)  | 50(1)  | -20(1) |
| F(12) | 156(2) | 55(1)   | 112(2) | -14(1) | 39(1)  | -35(1) |

---

Table 5. Hydrogen coordinates (  $\times 10^4$ ) and isotropic displacement parameters ( $\text{\AA}^2 \times 10^3$ ) for rpsl20a.

|       | x    | y    | z    | U(eq) |
|-------|------|------|------|-------|
| H(1)  | 7226 | 596  | 6871 | 73    |
| H(2)  | 7403 | 29   | 5031 | 77    |
| H(3)  | 5992 | 204  | 3134 | 77    |
| H(4)  | 4448 | 990  | 3090 | 64    |
| H(6A) | 4000 | 1821 | 5964 | 48    |
| H(6B) | 3218 | 1517 | 4654 | 48    |
| H(8)  | 2890 | 3019 | 6211 | 50    |
| H(10) | 40   | 4040 | 4111 | 64    |
| H(12) | 2402 | 3202 | 2359 | 57    |
| H(16) | 5890 | 2322 | 6700 | 44    |
| H(18) | 7968 | 4011 | 7021 | 56    |
| H(20) | 5142 | 3809 | 3968 | 49    |

Table 6. Torsion angles [°] for rpsl20a.

---

|                        |             |
|------------------------|-------------|
| C(5)-N(1)-C(1)-C(2)    | -1.0(3)     |
| N(1)-C(1)-C(2)-C(3)    | -0.1(4)     |
| C(1)-C(2)-C(3)-C(4)    | 1.3(4)      |
| C(2)-C(3)-C(4)-C(5)    | -1.5(3)     |
| C(1)-N(1)-C(5)-C(4)    | 0.8(3)      |
| C(1)-N(1)-C(5)-C(6)    | -179.13(17) |
| C(3)-C(4)-C(5)-N(1)    | 0.4(3)      |
| C(3)-C(4)-C(5)-C(6)    | -179.66(17) |
| N(1)-C(5)-C(6)-P(1)    | 109.07(16)  |
| C(4)-C(5)-C(6)-P(1)    | -70.86(19)  |
| O(1)-P(1)-C(6)-C(5)    | 53.98(15)   |
| C(15)-P(1)-C(6)-C(5)   | -71.65(14)  |
| C(7)-P(1)-C(6)-C(5)    | 174.76(12)  |
| O(1)-P(1)-C(7)-C(8)    | 177.77(15)  |
| C(15)-P(1)-C(7)-C(8)   | -61.46(17)  |
| C(6)-P(1)-C(7)-C(8)    | 53.48(17)   |
| O(1)-P(1)-C(7)-C(12)   | -2.75(16)   |
| C(15)-P(1)-C(7)-C(12)  | 118.02(14)  |
| C(6)-P(1)-C(7)-C(12)   | -127.04(15) |
| C(12)-C(7)-C(8)-C(9)   | 1.9(3)      |
| P(1)-C(7)-C(8)-C(9)    | -178.65(14) |
| C(7)-C(8)-C(9)-C(10)   | -0.8(3)     |
| C(7)-C(8)-C(9)-C(13)   | -179.4(2)   |
| C(8)-C(9)-C(10)-C(11)  | -1.1(3)     |
| C(13)-C(9)-C(10)-C(11) | 177.5(2)    |
| C(9)-C(10)-C(11)-C(12) | 1.9(3)      |
| C(9)-C(10)-C(11)-C(14) | -174.9(3)   |
| C(10)-C(11)-C(12)-C(7) | -0.8(3)     |
| C(14)-C(11)-C(12)-C(7) | 176.0(3)    |
| C(8)-C(7)-C(12)-C(11)  | -1.1(3)     |
| P(1)-C(7)-C(12)-C(11)  | 179.38(16)  |
| C(10)-C(9)-C(13)-F(1A) | -175.2(10)  |
| C(8)-C(9)-C(13)-F(1A)  | 3.5(11)     |
| C(10)-C(9)-C(13)-F(3A) | -29.9(10)   |

|                         |             |
|-------------------------|-------------|
| C(8)-C(9)-C(13)-F(3A)   | 148.8(9)    |
| C(10)-C(9)-C(13)-F(3)   | 132.2(5)    |
| C(8)-C(9)-C(13)-F(3)    | -49.2(6)    |
| C(10)-C(9)-C(13)-F(2)   | -2.0(7)     |
| C(8)-C(9)-C(13)-F(2)    | 176.7(6)    |
| C(10)-C(9)-C(13)-F(2A)  | 77.5(8)     |
| C(8)-C(9)-C(13)-F(2A)   | -103.9(7)   |
| C(10)-C(9)-C(13)-F(1)   | -117.6(3)   |
| C(8)-C(9)-C(13)-F(1)    | 61.1(4)     |
| C(12)-C(11)-C(14)-F(4A) | 165.6(9)    |
| C(10)-C(11)-C(14)-F(4A) | -17.6(10)   |
| C(12)-C(11)-C(14)-F(4)  | 0.7(8)      |
| C(10)-C(11)-C(14)-F(4)  | 177.5(7)    |
| C(12)-C(11)-C(14)-F(6)  | -132.5(12)  |
| C(10)-C(11)-C(14)-F(6)  | 44.3(13)    |
| C(12)-C(11)-C(14)-F(6A) | 42.4(12)    |
| C(10)-C(11)-C(14)-F(6A) | -140.8(11)  |
| C(12)-C(11)-C(14)-F(5)  | 113.6(7)    |
| C(10)-C(11)-C(14)-F(5)  | -69.6(7)    |
| C(12)-C(11)-C(14)-F(5A) | -76.8(8)    |
| C(10)-C(11)-C(14)-F(5A) | 100.0(8)    |
| O(1)-P(1)-C(15)-C(16)   | -125.55(14) |
| C(6)-P(1)-C(15)-C(16)   | 1.71(15)    |
| C(7)-P(1)-C(15)-C(16)   | 115.48(14)  |
| O(1)-P(1)-C(15)-C(20)   | 51.33(15)   |
| C(6)-P(1)-C(15)-C(20)   | 178.60(12)  |
| C(7)-P(1)-C(15)-C(20)   | -67.64(14)  |
| C(20)-C(15)-C(16)-C(17) | -0.5(2)     |
| P(1)-C(15)-C(16)-C(17)  | 176.21(12)  |
| C(15)-C(16)-C(17)-C(18) | 1.5(3)      |
| C(15)-C(16)-C(17)-C(21) | -178.47(16) |
| C(16)-C(17)-C(18)-C(19) | -0.2(3)     |
| C(21)-C(17)-C(18)-C(19) | 179.69(18)  |
| C(17)-C(18)-C(19)-C(20) | -1.9(3)     |
| C(17)-C(18)-C(19)-C(22) | 178.79(19)  |
| C(16)-C(15)-C(20)-C(19) | -1.5(3)     |



|                         |             |
|-------------------------|-------------|
| P(1)-C(15)-C(20)-C(19)  | -178.51(13) |
| C(18)-C(19)-C(20)-C(15) | 2.8(3)      |
| C(22)-C(19)-C(20)-C(15) | -177.92(18) |
| C(18)-C(17)-C(21)-F(7A) | 116.1(6)    |
| C(16)-C(17)-C(21)-F(7A) | -63.9(6)    |
| C(18)-C(17)-C(21)-F(7)  | -35.1(6)    |
| C(16)-C(17)-C(21)-F(7)  | 144.9(5)    |
| C(18)-C(17)-C(21)-F(8A) | -112.4(6)   |
| C(16)-C(17)-C(21)-F(8A) | 67.5(6)     |
| C(18)-C(17)-C(21)-F(8)  | 91.6(5)     |
| C(16)-C(17)-C(21)-F(8)  | -88.5(5)    |
| C(18)-C(17)-C(21)-F(9A) | -0.2(5)     |
| C(16)-C(17)-C(21)-F(9A) | 179.7(4)    |
| C(18)-C(17)-C(21)-F(9)  | -158.9(4)   |
| C(16)-C(17)-C(21)-F(9)  | 21.0(4)     |
| C(18)-C(19)-C(22)-F(11) | 64.1(3)     |
| C(20)-C(19)-C(22)-F(11) | -115.2(2)   |
| C(18)-C(19)-C(22)-F(10) | -174.9(2)   |
| C(20)-C(19)-C(22)-F(10) | 5.8(3)      |
| C(18)-C(19)-C(22)-F(12) | -57.1(3)    |
| C(20)-C(19)-C(22)-F(12) | 123.6(2)    |

---

Table 7. Possible Hydrogen bonds for rpsl20a [ $\text{\AA}$  and  $^\circ$ ].

| D-H...A             | d(D-H) | d(H...A) | d(D...A) | $\angle(\text{DHA})$ |
|---------------------|--------|----------|----------|----------------------|
| C(6)-H(6A)...O(1)#1 | 0.98   | 2.45     | 3.364(2) | 155.7                |
| C(8)-H(8)...O(1)#1  | 0.94   | 2.26     | 3.188(2) | 168.0                |
| C(12)-H(12)...O(1)  | 0.94   | 2.48     | 2.930(2) | 109.1                |
| C(16)-H(16)...F(9)  | 0.94   | 2.44     | 2.766(5) | 100.1                |
| C(16)-H(16)...N(1)  | 0.94   | 2.42     | 3.193(3) | 139.4                |
| C(18)-H(18)...F(9A) | 0.94   | 2.27     | 2.611(7) | 100.9                |

Symmetry transformations used to generate equivalent atoms:

#1  $x, -y+1/2, z+1/2$

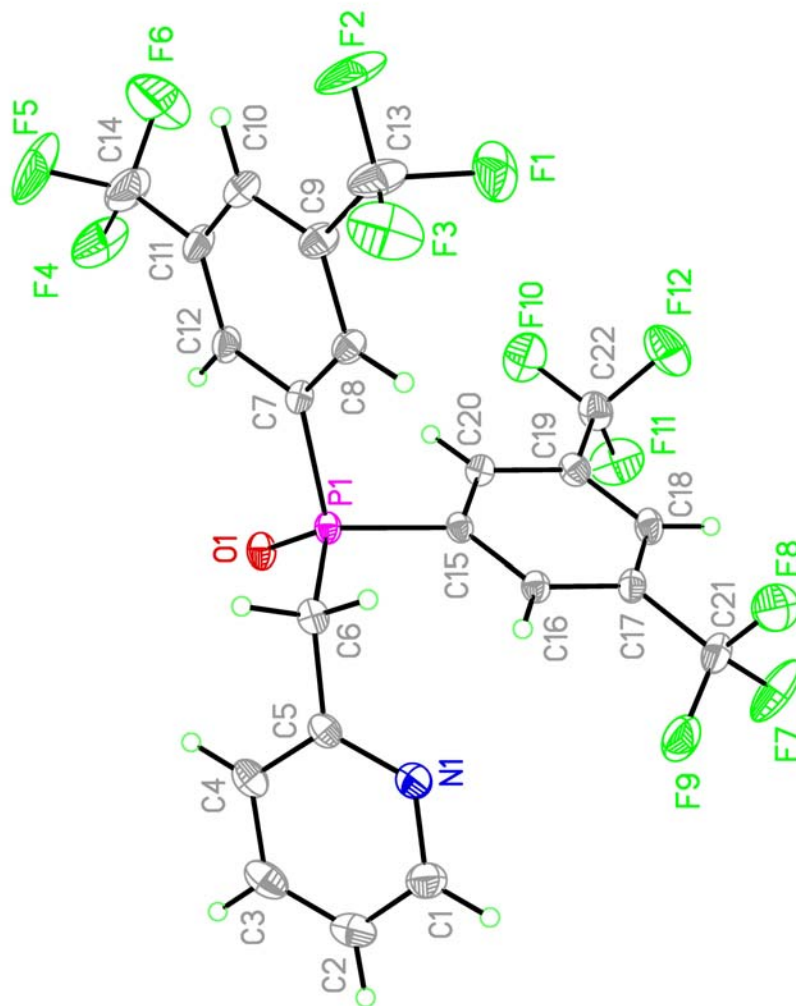

Figure 1. rpsl2011.jpg, Single molecule view, only part one of all disordered F's included, thermal displacement ellipsoids at 20%, rpsl2011b.jpg=b/w; only F1,F2,F3,F4,F5,F6,F7,F8 F9 of disorder shown.

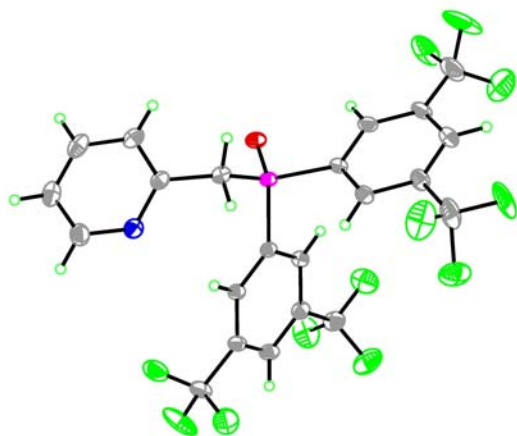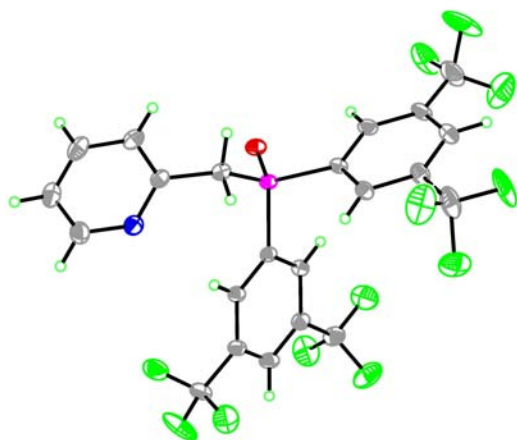

Figure 3.rpsl20s1.jpg also rpsl20s1b.jpg[b/w], stereoview of single molecule. Disorder not shown.

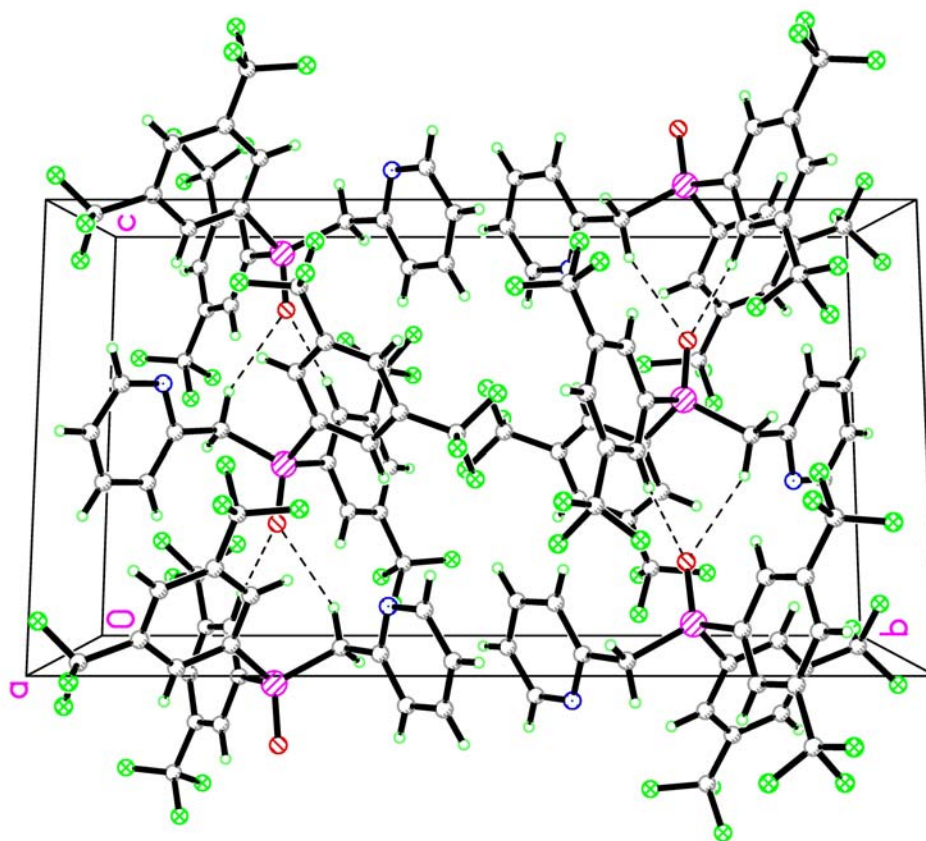

Figure 3.rpsl20a11.jpg packing view down a-axis,color,also rpsl20a11b.jpg b/w, O1—H6, and O1—H8 distances shown [dotted lines]. Disorder not shown.

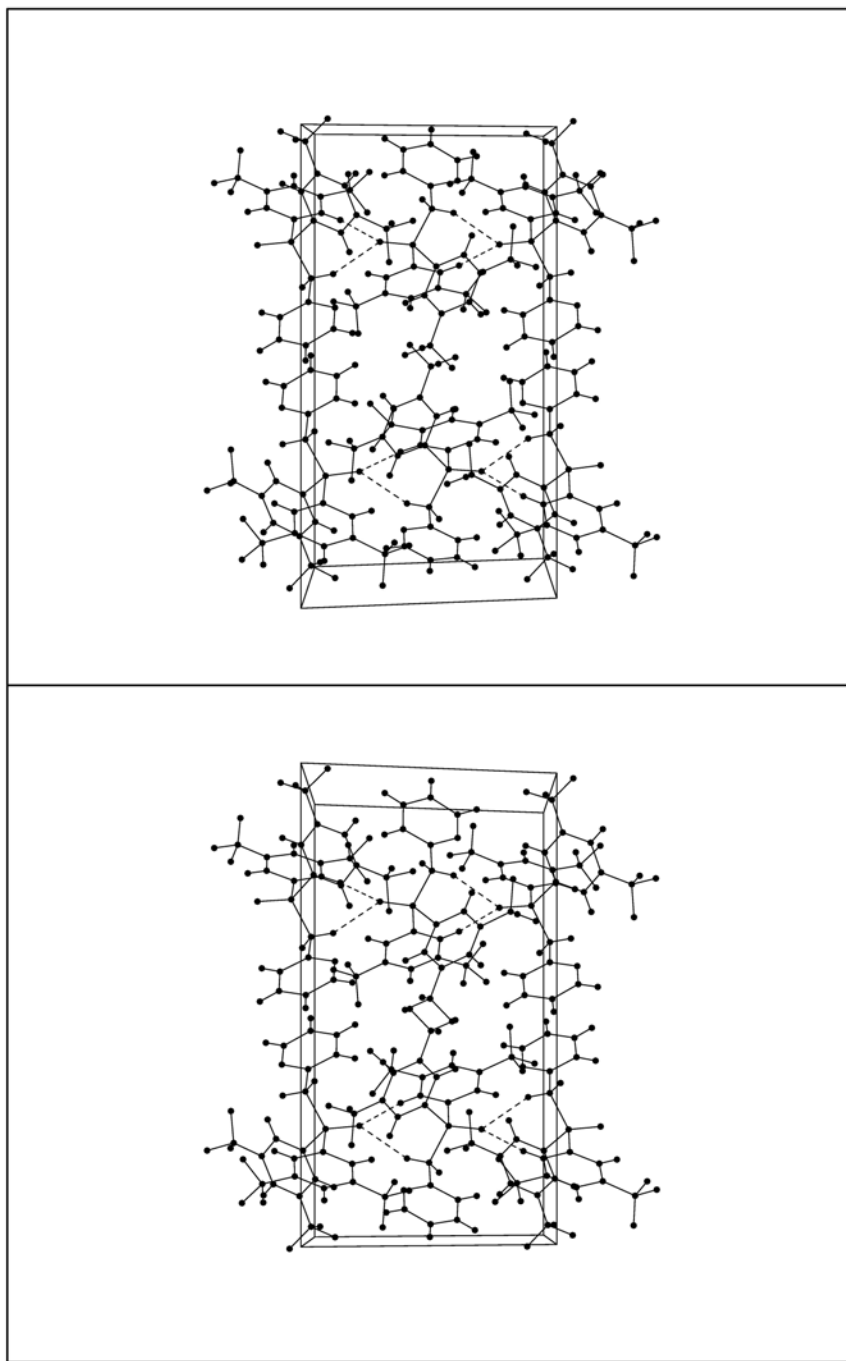

Figure 4.rps120.jpg, stereoview of packing, view down a-axis,b/w only.Disorder not shown.

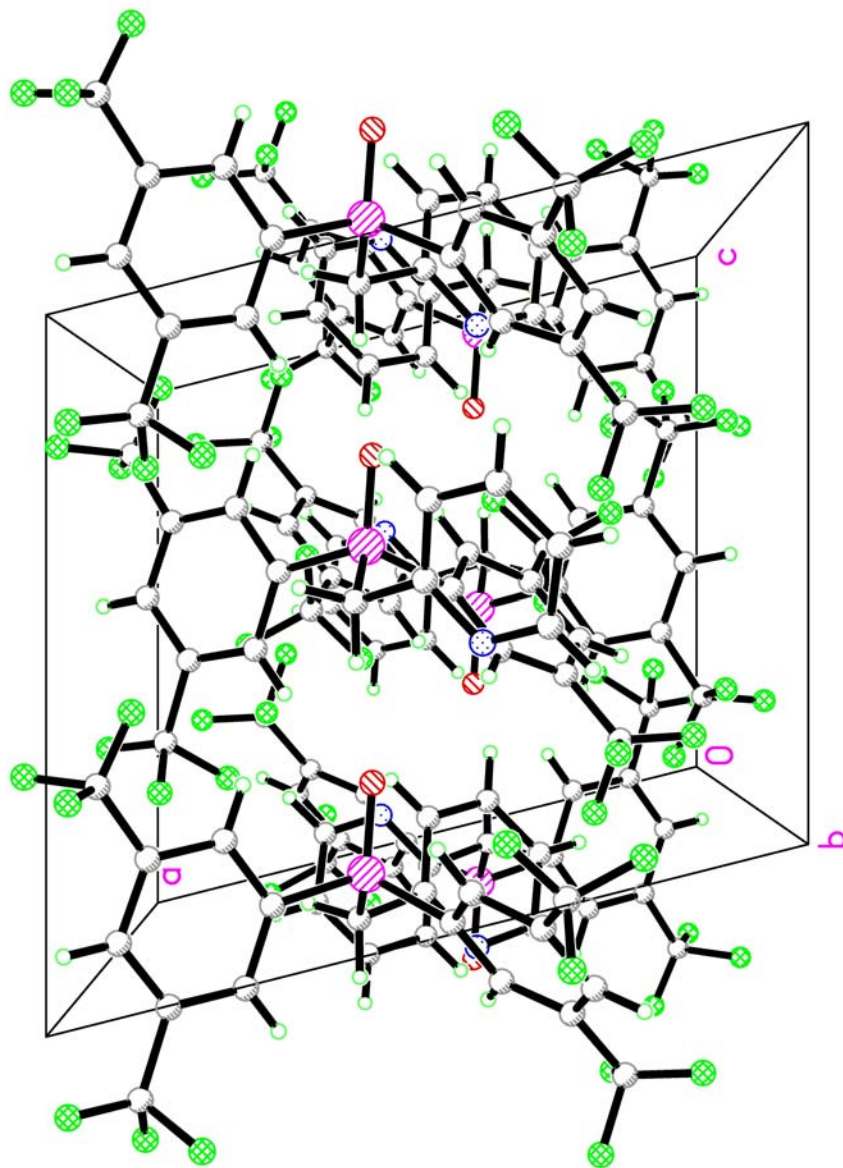

Figure 5. rpsl20bl.jpg packing view down b-axis,color,also rpsl20blb.jpg b/w, also see rpsl20bs.jpg, stereo view of same. Disorder not shown.

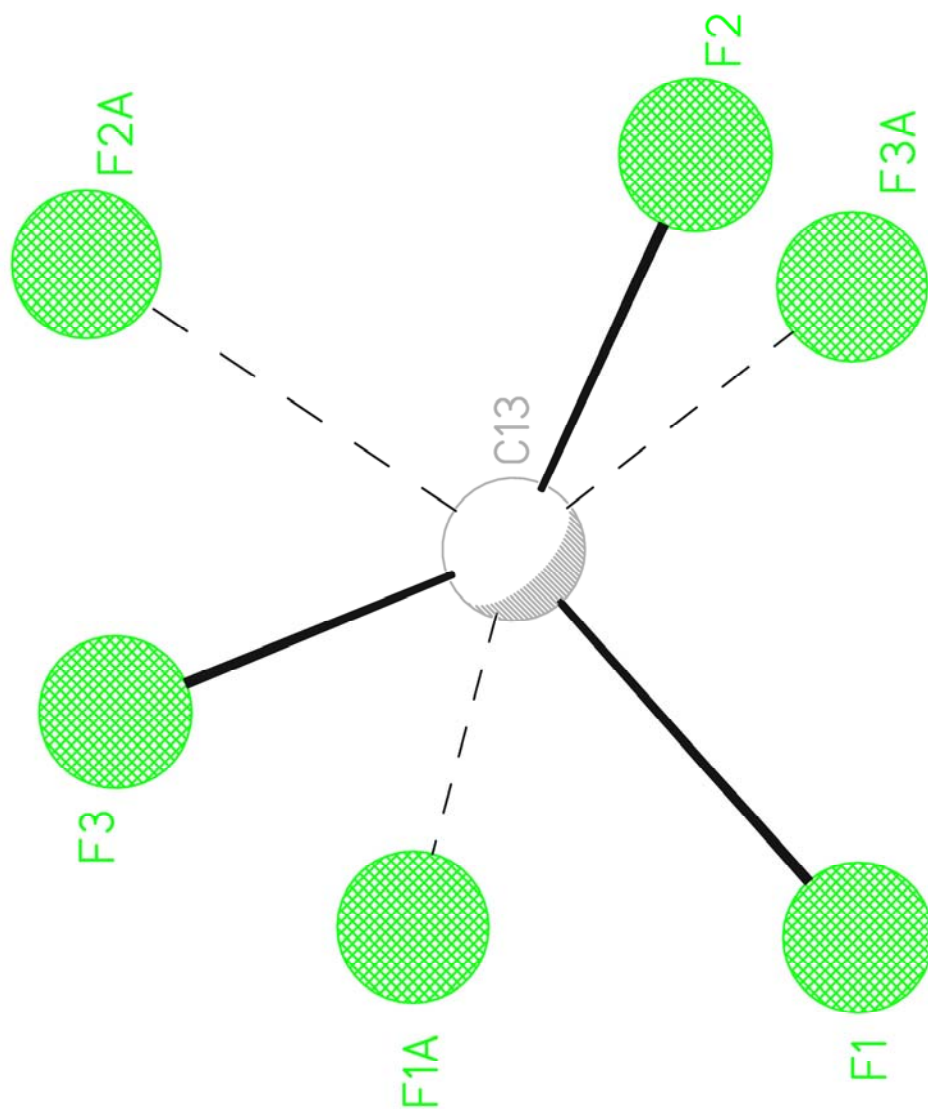

Figure 6. rpsl20c13.jpg CF<sub>3</sub> of C13, showing two sets of F's; F1-3 at 60% occupancy, F1A-3A at 40% occupancy. rpsl20c13b.jpg=b/w version



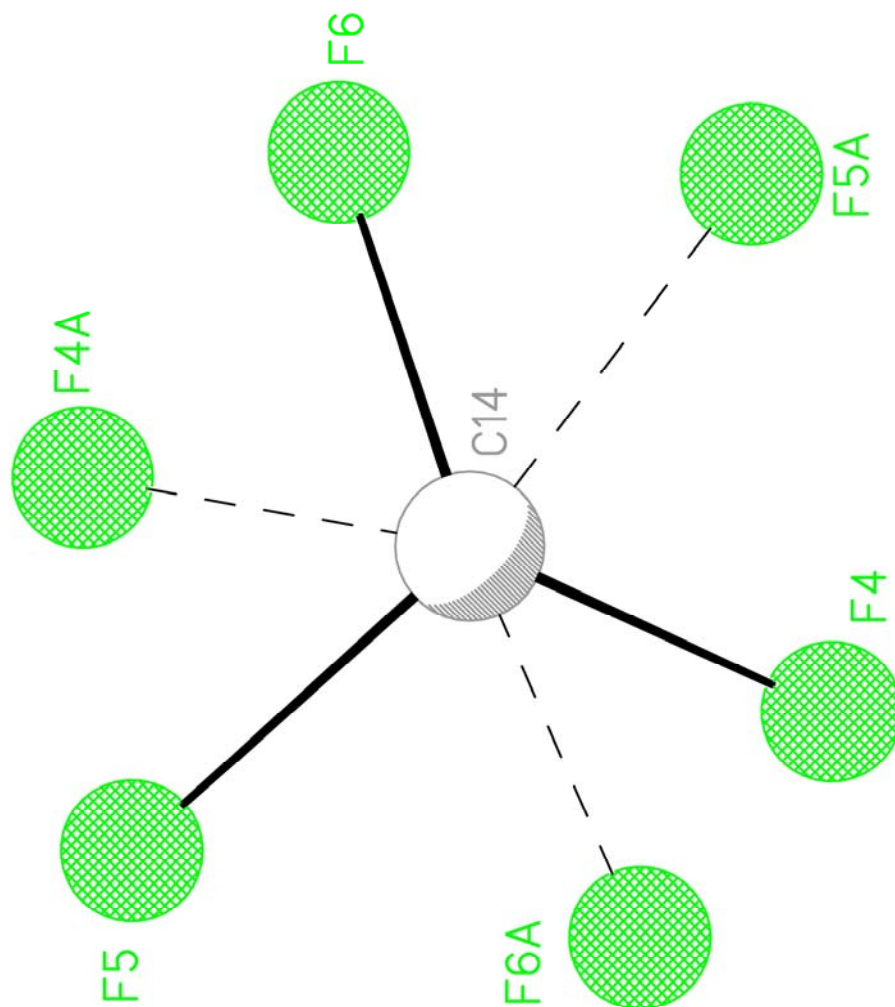

Figure 7 . rpsl20c14.jpg and rpsl20c14b.jpg, CF<sub>3</sub> plan of C14, two sets of F's, each at 50% occupancy

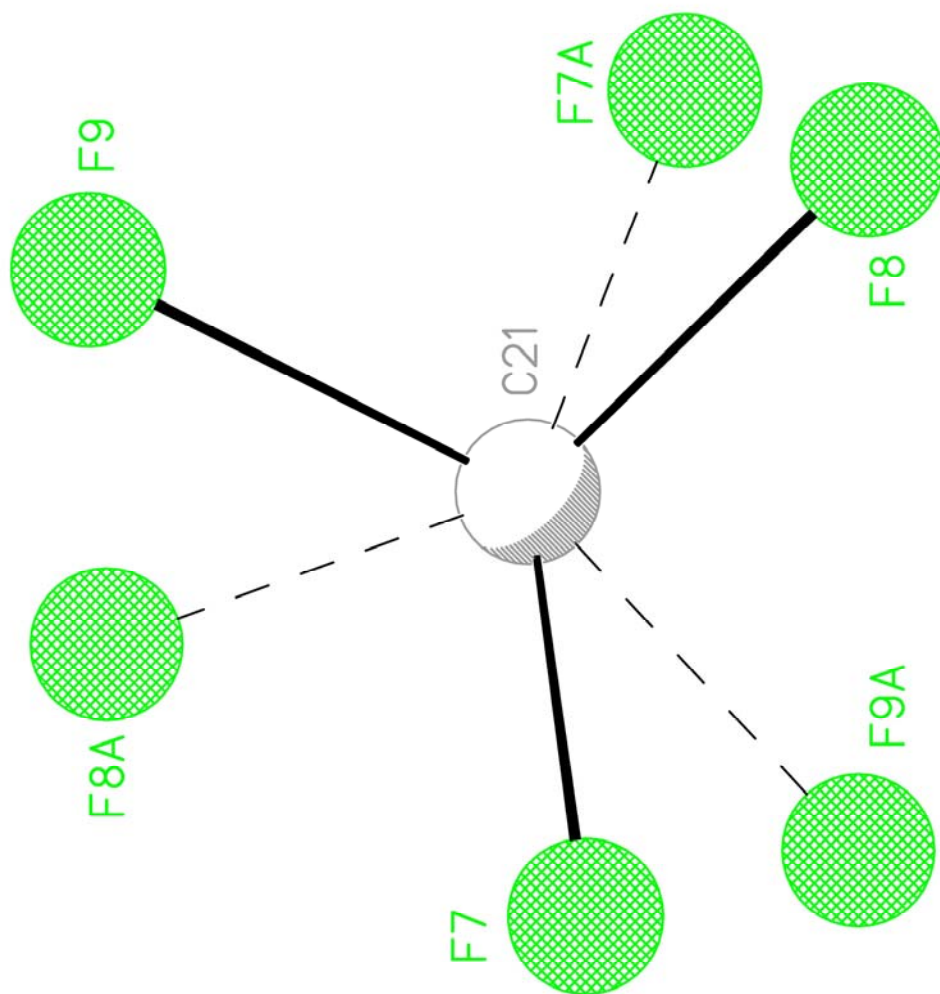

Figure 8. rps20c21p.jpg and rpsl20c21b.jpg, CF<sub>3</sub> plan of C21, two sets of F's each at 50% occupancy



X-ray Crystallographic data for **1d**.

# Crystal Structure Report

Prepared for:

Professor R. T. Paine/ Sylvie Pailloux  
rtpaine@unm.edu,spailou@unm.edu

Compound:

Rps22/slp-11-41  
C<sub>22</sub> H<sub>12</sub> F<sub>12</sub> N O<sub>2</sub> P

Prepared by:

Eileen Duesler

[Duesler@unm.edu](mailto:Duesler@unm.edu)

277-6649

Issue date:

January 26, 2007

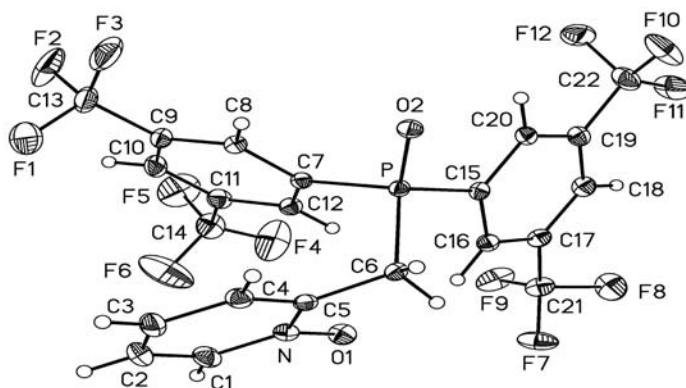

Rpsl22l1b.jpg \$253=[\$[225+2[44-30]]

Table 1. Crystal data and structure refinement for rpsl22.

|                                   |                                                                    |                  |
|-----------------------------------|--------------------------------------------------------------------|------------------|
| Identification code               | rpsl22                                                             |                  |
| Empirical formula                 | C <sub>22</sub> H <sub>12</sub> F <sub>12</sub> N O <sub>2</sub> P |                  |
| Formula weight                    | 581.30                                                             |                  |
| Temperature                       | 223(2) K                                                           |                  |
| Wavelength                        | 0.71073 Å                                                          |                  |
| Crystal system                    | Monoclinic                                                         |                  |
| Space group                       | C2/c                                                               |                  |
| Unit cell dimensions              | a = 18.7789(6) Å                                                   | α = 90°.         |
|                                   | b = 24.0769(8) Å                                                   | β = 117.727(2)°. |
|                                   | c = 11.4618(4) Å                                                   | γ = 90°.         |
| Volume                            | 4587.2(3) Å <sup>3</sup>                                           |                  |
| Z                                 | 8                                                                  |                  |
| Density (calculated)              | 1.683 Mg/m <sup>3</sup>                                            |                  |
| Absorption coefficient            | 0.239 mm <sup>-1</sup>                                             |                  |
| F(000)                            | 2320                                                               |                  |
| Crystal size                      | 0.32 x 0.23 x 0.16 mm <sup>3</sup>                                 |                  |
| Theta range for data collection   | 2.63 to 28.32°.                                                    |                  |
| Index ranges                      | -24 ≤ h ≤ 25, -32 ≤ k ≤ 32, -15 ≤ l ≤ 15                           |                  |
| Reflections collected             | 38656                                                              |                  |
| Independent reflections           | 5720 [R(int) = 0.0219]                                             |                  |
| Completeness to theta = 28.32°    | 99.8 %                                                             |                  |
| Absorption correction             | Semi-empirical from equivalents                                    |                  |
| Max. and min. transmission        | 0.960 and 0.926                                                    |                  |
| Refinement method                 | Full-matrix least-squares on F <sup>2</sup>                        |                  |
| Data / restraints / parameters    | 5720 / 0 / 397                                                     |                  |
| Goodness-of-fit on F <sup>2</sup> | 1.044                                                              |                  |
| Final R indices [I > 2σ(I)]       | R1 = 0.0473, wR2 = 0.1265                                          |                  |
| R indices (all data)              | R1 = 0.0567, wR2 = 0.1354                                          |                  |
| Largest diff. peak and hole       | 0.578 and -0.444 e.Å <sup>-3</sup>                                 |                  |

Table 2. Atomic coordinates ( $\times 10^4$ ) and equivalent isotropic displacement parameters ( $\text{\AA}^2 \times 10^3$ ) for rpsl22.  $U(\text{eq})$  is defined as one third of the trace of the orthogonalized  $U^{ij}$  tensor.

|       | x       | y        | z       | $U(\text{eq})$ |
|-------|---------|----------|---------|----------------|
| P     | 1528(1) | 130(1)   | 1061(1) | 26(1)          |
| N     | 1457(1) | 1285(1)  | -681(2) | 35(1)          |
| O(1)  | 2099(1) | 1039(1)  | -588(2) | 44(1)          |
| O(2)  | 1014(1) | -168(1)  | 1520(1) | 35(1)          |
| C(1)  | 1420(1) | 1849(1)  | -679(2) | 48(1)          |
| C(2)  | 763(2)  | 2115(1)  | -738(2) | 55(1)          |
| C(3)  | 119(2)  | 1812(1)  | -814(2) | 50(1)          |
| C(4)  | 157(1)  | 1239(1)  | -822(2) | 39(1)          |
| C(5)  | 831(1)  | 976(1)   | -743(2) | 30(1)          |
| C(6)  | 952(1)  | 364(1)   | -650(2) | 30(1)          |
| C(7)  | 1956(1) | 744(1)   | 2067(2) | 29(1)          |
| C(8)  | 1520(1) | 971(1)   | 2650(2) | 33(1)          |
| C(9)  | 1791(1) | 1447(1)  | 3412(2) | 40(1)          |
| C(10) | 2498(1) | 1699(1)  | 3605(2) | 46(1)          |
| C(11) | 2935(1) | 1469(1)  | 3034(2) | 43(1)          |
| C(12) | 2671(1) | 993(1)   | 2270(2) | 35(1)          |
| C(13) | 1303(2) | 1698(1)  | 4007(2) | 56(1)          |
| F(1)  | 856(1)  | 2104(1)  | 3312(2) | 104(1)         |
| F(2)  | 1757(1) | 1906(1)  | 5192(2) | 111(1)         |
| F(3)  | 830(2)  | 1342(1)  | 4151(3) | 117(1)         |
| C(14) | 3690(2) | 1751(1)  | 3219(3) | 66(1)          |
| F(4)  | 4148(1) | 1442(1)  | 2925(3) | 129(1)         |
| F(5)  | 4149(1) | 1910(1)  | 4450(2) | 115(1)         |
| F(6)  | 3544(2) | 2207(1)  | 2554(3) | 151(1)         |
| C(15) | 2371(1) | -283(1)  | 1220(2) | 30(1)          |
| C(16) | 2854(1) | -125(1)  | 654(2)  | 33(1)          |
| C(17) | 3535(1) | -431(1)  | 909(2)  | 37(1)          |
| C(18) | 3726(1) | -902(1)  | 1689(2) | 41(1)          |
| C(19) | 3239(1) | -1061(1) | 2233(2) | 41(1)          |
| C(20) | 2566(1) | -752(1)  | 2022(2) | 35(1)          |
| C(21) | 4093(1) | -225(1)  | 405(2)  | 49(1)          |

|        |         |          |          |        |
|--------|---------|----------|----------|--------|
| F(7)   | 3731(6) | -34(5)   | -780(10) | 71(3)  |
| F(8)   | 4497(4) | -687(3)  | 236(7)   | 83(2)  |
| F(9)   | 4614(4) | 89(3)    | 1154(6)  | 81(2)  |
| F(7A)  | 4743(3) | -489(3)  | 769(6)   | 84(2)  |
| F(8A)  | 4368(5) | 319(3)   | 920(9)   | 87(2)  |
| F(9A)  | 3731(7) | -116(6)  | -851(10) | 72(3)  |
| C(22)  | 3467(2) | -1563(1) | 3123(3)  | 60(1)  |
| F(10)  | 2877(3) | -1890(3) | 2918(6)  | 95(2)  |
| F(11)  | 4080(3) | -1839(2) | 3177(5)  | 93(2)  |
| F(12)  | 3732(4) | -1412(3) | 4392(5)  | 81(2)  |
| F(10A) | 3990(8) | -1499(5) | 4216(13) | 178(8) |
| F(11A) | 2816(7) | -1811(5) | 3062(12) | 82(3)  |
| F(12A) | 3610(7) | -1992(3) | 2401(10) | 121(3) |

---

Table 3. Bond lengths [ $\text{\AA}$ ] and angles [ $^\circ$ ] for rpsl22.

---

|             |            |
|-------------|------------|
| P-O(2)      | 1.4825(12) |
| P-C(15)     | 1.8052(17) |
| P-C(7)      | 1.8165(17) |
| P-C(6)      | 1.8325(17) |
| N-O(1)      | 1.303(2)   |
| N-C(1)      | 1.359(3)   |
| N-C(5)      | 1.364(2)   |
| C(1)-C(2)   | 1.364(3)   |
| C(1)-H(1A)  | 0.9400     |
| C(2)-C(3)   | 1.381(3)   |
| C(2)-H(2)   | 0.9400     |
| C(3)-C(4)   | 1.380(3)   |
| C(3)-H(3)   | 0.9400     |
| C(4)-C(5)   | 1.381(3)   |
| C(4)-H(4)   | 0.9400     |
| C(5)-C(6)   | 1.488(2)   |
| C(6)-H(6A)  | 0.9800     |
| C(6)-H(6B)  | 0.9800     |
| C(7)-C(12)  | 1.387(2)   |
| C(7)-C(8)   | 1.388(2)   |
| C(8)-C(9)   | 1.386(3)   |
| C(8)-H(8)   | 0.9400     |
| C(9)-C(10)  | 1.381(3)   |
| C(9)-C(13)  | 1.501(3)   |
| C(10)-C(11) | 1.382(3)   |
| C(10)-H(10) | 0.9400     |
| C(11)-C(12) | 1.387(3)   |
| C(11)-C(14) | 1.494(3)   |
| C(12)-H(12) | 0.9400     |
| C(13)-F(1)  | 1.294(3)   |
| C(13)-F(3)  | 1.299(3)   |
| C(13)-F(2)  | 1.321(3)   |
| C(14)-F(6)  | 1.291(4)   |
| C(14)-F(4)  | 1.295(3)   |



|              |            |
|--------------|------------|
| C(14)-F(5)   | 1.323(3)   |
| C(15)-C(16)  | 1.392(2)   |
| C(15)-C(20)  | 1.394(2)   |
| C(16)-C(17)  | 1.385(3)   |
| C(16)-H(16)  | 0.9400     |
| C(17)-C(18)  | 1.383(3)   |
| C(17)-C(21)  | 1.496(3)   |
| C(18)-C(19)  | 1.380(3)   |
| C(18)-H(18)  | 0.9400     |
| C(19)-C(20)  | 1.388(3)   |
| C(19)-C(22)  | 1.508(3)   |
| C(20)-H(20)  | 0.9400     |
| C(21)-F(9)   | 1.219(6)   |
| C(21)-F(7A)  | 1.264(6)   |
| C(21)-F(7)   | 1.287(10)  |
| C(21)-F(9A)  | 1.300(11)  |
| C(21)-F(8)   | 1.410(7)   |
| C(21)-F(8A)  | 1.430(8)   |
| C(22)-F(10A) | 1.189(12)  |
| C(22)-F(10)  | 1.288(6)   |
| C(22)-F(11)  | 1.305(5)   |
| C(22)-F(11A) | 1.332(11)  |
| C(22)-F(12)  | 1.350(6)   |
| C(22)-F(12A) | 1.424(8)   |
| O(2)-P-C(15) | 112.48(8)  |
| O(2)-P-C(7)  | 109.71(7)  |
| C(15)-P-C(7) | 106.07(8)  |
| O(2)-P-C(6)  | 111.74(8)  |
| C(15)-P-C(6) | 109.35(8)  |
| C(7)-P-C(6)  | 107.21(8)  |
| O(1)-N-C(1)  | 120.08(17) |
| O(1)-N-C(5)  | 119.86(15) |
| C(1)-N-C(5)  | 120.04(17) |
| N-C(1)-C(2)  | 121.0(2)   |
| N-C(1)-H(1A) | 119.5      |

|                   |            |
|-------------------|------------|
| C(2)-C(1)-H(1A)   | 119.5      |
| C(1)-C(2)-C(3)    | 120.0(2)   |
| C(1)-C(2)-H(2)    | 120.0      |
| C(3)-C(2)-H(2)    | 120.0      |
| C(4)-C(3)-C(2)    | 118.8(2)   |
| C(4)-C(3)-H(3)    | 120.6      |
| C(2)-C(3)-H(3)    | 120.6      |
| C(3)-C(4)-C(5)    | 120.46(19) |
| C(3)-C(4)-H(4)    | 119.8      |
| C(5)-C(4)-H(4)    | 119.8      |
| N-C(5)-C(4)       | 119.68(16) |
| N-C(5)-C(6)       | 115.96(15) |
| C(4)-C(5)-C(6)    | 124.29(16) |
| C(5)-C(6)-P       | 112.07(11) |
| C(5)-C(6)-H(6A)   | 109.2      |
| P-C(6)-H(6A)      | 109.2      |
| C(5)-C(6)-H(6B)   | 109.2      |
| P-C(6)-H(6B)      | 109.2      |
| H(6A)-C(6)-H(6B)  | 107.9      |
| C(12)-C(7)-C(8)   | 119.46(16) |
| C(12)-C(7)-P      | 124.44(13) |
| C(8)-C(7)-P       | 116.10(13) |
| C(9)-C(8)-C(7)    | 120.13(17) |
| C(9)-C(8)-H(8)    | 119.9      |
| C(7)-C(8)-H(8)    | 119.9      |
| C(10)-C(9)-C(8)   | 120.61(18) |
| C(10)-C(9)-C(13)  | 119.63(19) |
| C(8)-C(9)-C(13)   | 119.74(19) |
| C(9)-C(10)-C(11)  | 119.11(18) |
| C(9)-C(10)-H(10)  | 120.4      |
| C(11)-C(10)-H(10) | 120.4      |
| C(10)-C(11)-C(12) | 120.87(19) |
| C(10)-C(11)-C(14) | 118.96(19) |
| C(12)-C(11)-C(14) | 120.1(2)   |
| C(7)-C(12)-C(11)  | 119.80(18) |
| C(7)-C(12)-H(12)  | 120.1      |

|                   |            |
|-------------------|------------|
| C(11)-C(12)-H(12) | 120.1      |
| F(1)-C(13)-F(3)   | 107.0(3)   |
| F(1)-C(13)-F(2)   | 105.6(2)   |
| F(3)-C(13)-F(2)   | 105.8(2)   |
| F(1)-C(13)-C(9)   | 112.6(2)   |
| F(3)-C(13)-C(9)   | 112.94(19) |
| F(2)-C(13)-C(9)   | 112.4(2)   |
| F(6)-C(14)-F(4)   | 108.6(3)   |
| F(6)-C(14)-F(5)   | 103.8(3)   |
| F(4)-C(14)-F(5)   | 105.1(3)   |
| F(6)-C(14)-C(11)  | 112.1(3)   |
| F(4)-C(14)-C(11)  | 113.8(2)   |
| F(5)-C(14)-C(11)  | 112.7(2)   |
| C(16)-C(15)-C(20) | 120.10(16) |
| C(16)-C(15)-P     | 122.17(13) |
| C(20)-C(15)-P     | 117.55(13) |
| C(17)-C(16)-C(15) | 119.59(17) |
| C(17)-C(16)-H(16) | 120.2      |
| C(15)-C(16)-H(16) | 120.2      |
| C(18)-C(17)-C(16) | 120.59(17) |
| C(18)-C(17)-C(21) | 120.29(18) |
| C(16)-C(17)-C(21) | 118.98(18) |
| C(19)-C(18)-C(17) | 119.57(18) |
| C(19)-C(18)-H(18) | 120.2      |
| C(17)-C(18)-H(18) | 120.2      |
| C(18)-C(19)-C(20) | 120.90(18) |
| C(18)-C(19)-C(22) | 119.30(19) |
| C(20)-C(19)-C(22) | 119.73(19) |
| C(19)-C(20)-C(15) | 119.21(17) |
| C(19)-C(20)-H(20) | 120.4      |
| C(15)-C(20)-H(20) | 120.4      |
| F(9)-C(21)-F(7)   | 112.3(7)   |
| F(7A)-C(21)-F(7)  | 118.9(6)   |
| F(9)-C(21)-F(9A)  | 119.3(7)   |
| F(7A)-C(21)-F(9A) | 113.2(7)   |
| F(9)-C(21)-F(8)   | 106.1(4)   |

|                     |          |
|---------------------|----------|
| F(7)-C(21)-F(8)     | 101.0(6) |
| F(7A)-C(21)-F(8A)   | 102.5(4) |
| F(9A)-C(21)-F(8A)   | 100.0(7) |
| F(9)-C(21)-C(17)    | 114.3(4) |
| F(7A)-C(21)-C(17)   | 116.6(3) |
| F(7)-C(21)-C(17)    | 113.9(5) |
| F(9A)-C(21)-C(17)   | 113.3(6) |
| F(8)-C(21)-C(17)    | 108.0(3) |
| F(8A)-C(21)-C(17)   | 109.1(4) |
| F(10)-C(22)-F(11)   | 111.3(5) |
| F(10A)-C(22)-F(11A) | 113.7(9) |
| F(10)-C(22)-F(12)   | 102.5(5) |
| F(11)-C(22)-F(12)   | 102.2(4) |
| F(10A)-C(22)-F(12A) | 114.9(9) |
| F(11A)-C(22)-F(12A) | 93.5(6)  |
| F(10A)-C(22)-C(19)  | 116.3(6) |
| F(10)-C(22)-C(19)   | 114.6(4) |
| F(11)-C(22)-C(19)   | 113.9(3) |
| F(11A)-C(22)-C(19)  | 111.0(5) |
| F(12)-C(22)-C(19)   | 111.0(3) |
| F(12A)-C(22)-C(19)  | 105.0(4) |

---

Table 4. Anisotropic displacement parameters ( $\text{\AA}^2 \times 10^3$ ) for rpsl22. The anisotropic displacement factor exponent takes the form:  $-2\pi^2 [ h^2 a^{*2} U^{11} + \dots + 2 h k a^* b^* U^{12} ]$

|       | U <sup>11</sup> | U <sup>22</sup> | U <sup>33</sup> | U <sup>23</sup> | U <sup>13</sup> | U <sup>12</sup> |
|-------|-----------------|-----------------|-----------------|-----------------|-----------------|-----------------|
| P     | 28(1)           | 27(1)           | 28(1)           | -2(1)           | 16(1)           | -3(1)           |
| N     | 37(1)           | 38(1)           | 33(1)           | 4(1)            | 19(1)           | -2(1)           |
| O(1)  | 37(1)           | 50(1)           | 52(1)           | 4(1)            | 26(1)           | -1(1)           |
| O(2)  | 35(1)           | 36(1)           | 39(1)           | 2(1)            | 22(1)           | -5(1)           |
| C(1)  | 55(1)           | 38(1)           | 53(1)           | 6(1)            | 27(1)           | -8(1)           |
| C(2)  | 74(2)           | 31(1)           | 63(1)           | 6(1)            | 35(1)           | 4(1)            |
| C(3)  | 58(1)           | 42(1)           | 59(1)           | 9(1)            | 34(1)           | 15(1)           |
| C(4)  | 38(1)           | 42(1)           | 39(1)           | 6(1)            | 22(1)           | 4(1)            |
| C(5)  | 34(1)           | 33(1)           | 25(1)           | 2(1)            | 15(1)           | -1(1)           |
| C(6)  | 32(1)           | 32(1)           | 27(1)           | -3(1)           | 14(1)           | -3(1)           |
| C(7)  | 33(1)           | 28(1)           | 26(1)           | 0(1)            | 13(1)           | -2(1)           |
| C(8)  | 37(1)           | 33(1)           | 31(1)           | 0(1)            | 16(1)           | 1(1)            |
| C(9)  | 52(1)           | 35(1)           | 35(1)           | -3(1)           | 20(1)           | 5(1)            |
| C(10) | 57(1)           | 33(1)           | 44(1)           | -10(1)          | 18(1)           | -5(1)           |
| C(11) | 46(1)           | 36(1)           | 42(1)           | -3(1)           | 17(1)           | -11(1)          |
| C(12) | 37(1)           | 35(1)           | 34(1)           | -2(1)           | 17(1)           | -6(1)           |
| C(13) | 67(2)           | 50(1)           | 54(1)           | -12(1)          | 31(1)           | 10(1)           |
| F(1)  | 114(2)          | 103(2)          | 116(2)          | 30(1)           | 70(1)           | 64(1)           |
| F(2)  | 108(2)          | 145(2)          | 73(1)           | -55(1)          | 35(1)           | 28(1)           |
| F(3)  | 178(2)          | 82(1)           | 180(2)          | -36(1)          | 159(2)          | -21(1)          |
| C(14) | 63(2)           | 55(1)           | 81(2)           | -17(1)          | 36(1)           | -27(1)          |
| F(4)  | 93(1)           | 123(2)          | 212(3)          | -80(2)          | 106(2)          | -67(1)          |
| F(5)  | 78(1)           | 142(2)          | 105(2)          | -45(1)          | 25(1)           | -61(1)          |
| F(6)  | 104(2)          | 123(2)          | 201(3)          | 78(2)           | 50(2)           | -43(2)          |
| C(15) | 29(1)           | 30(1)           | 31(1)           | -4(1)           | 14(1)           | -2(1)           |
| C(16) | 32(1)           | 36(1)           | 32(1)           | -1(1)           | 16(1)           | -1(1)           |
| C(17) | 31(1)           | 46(1)           | 35(1)           | -2(1)           | 16(1)           | 1(1)            |
| C(18) | 35(1)           | 46(1)           | 43(1)           | 0(1)            | 18(1)           | 7(1)            |
| C(19) | 42(1)           | 36(1)           | 43(1)           | 3(1)            | 19(1)           | 5(1)            |
| C(20) | 38(1)           | 31(1)           | 38(1)           | -1(1)           | 20(1)           | -2(1)           |
| C(21) | 34(1)           | 71(2)           | 45(1)           | 4(1)            | 21(1)           | 5(1)            |

|        |         |         |         |        |        |        |
|--------|---------|---------|---------|--------|--------|--------|
| F(7)   | 46(4)   | 110(5)  | 66(5)   | 44(4)  | 34(4)  | 21(4)  |
| F(8)   | 82(4)   | 81(3)   | 128(5)  | 10(3)  | 83(4)  | 21(3)  |
| F(9)   | 61(3)   | 126(6)  | 58(2)   | -28(3) | 31(2)  | -56(4) |
| F(7A)  | 47(3)   | 118(6)  | 104(4)  | 55(4)  | 51(3)  | 36(3)  |
| F(8A)  | 89(5)   | 81(4)   | 120(5)  | -27(3) | 74(4)  | -42(3) |
| F(9A)  | 61(5)   | 120(6)  | 35(3)   | -5(3)  | 21(3)  | -36(4) |
| C(22)  | 62(2)   | 45(1)   | 78(2)   | 20(1)  | 36(1)  | 17(1)  |
| F(10)  | 89(3)   | 54(3)   | 99(3)   | 26(2)  | 7(3)   | -19(2) |
| F(11)  | 112(3)  | 80(3)   | 116(4)  | 53(3)  | 78(3)  | 66(3)  |
| F(12)  | 102(4)  | 84(2)   | 50(2)   | 27(2)  | 30(3)  | 26(2)  |
| F(10A) | 115(10) | 115(10) | 149(12) | 89(9)  | -68(7) | -40(7) |
| F(11A) | 125(7)  | 55(4)   | 123(6)  | 41(4)  | 105(6) | 33(4)  |
| F(12A) | 202(10) | 50(3)   | 176(9)  | 39(5)  | 143(8) | 63(5)  |

---

Table 5. Hydrogen coordinates ( $\times 10^4$ ) and isotropic displacement parameters ( $\text{\AA}^2 \times 10^3$ ) for rpsl22.

|       | x    | y     | z     | U(eq) |
|-------|------|-------|-------|-------|
| H(1A) | 1854 | 2058  | -636  | 57    |
| H(2)  | 749  | 2505  | -727  | 65    |
| H(3)  | -338 | 1992  | -858  | 60    |
| H(4)  | -279 | 1027  | -882  | 46    |
| H(6A) | 1236 | 255   | -1146 | 36    |
| H(6B) | 426  | 180   | -1053 | 36    |
| H(8)  | 1039 | 801   | 2528  | 40    |
| H(10) | 2679 | 2023  | 4118  | 56    |
| H(12) | 2975 | 839   | 1891  | 42    |
| H(16) | 2719 | 188   | 102   | 39    |
| H(18) | 4185 | -1111 | 1848  | 50    |
| H(20) | 2245 | -858  | 2416  | 42    |

Table 6. Torsion angles [°] for rpsl22.

---

|                        |             |
|------------------------|-------------|
| O(1)-N-C(1)-C(2)       | -178.15(19) |
| C(5)-N-C(1)-C(2)       | 0.1(3)      |
| N-C(1)-C(2)-C(3)       | -0.6(4)     |
| C(1)-C(2)-C(3)-C(4)    | 0.3(4)      |
| C(2)-C(3)-C(4)-C(5)    | 0.6(3)      |
| O(1)-N-C(5)-C(4)       | 179.05(15)  |
| C(1)-N-C(5)-C(4)       | 0.8(3)      |
| O(1)-N-C(5)-C(6)       | 2.1(2)      |
| C(1)-N-C(5)-C(6)       | -176.09(17) |
| C(3)-C(4)-C(5)-N       | -1.2(3)     |
| C(3)-C(4)-C(5)-C(6)    | 175.48(18)  |
| N-C(5)-C(6)-P          | 81.79(16)   |
| C(4)-C(5)-C(6)-P       | -94.98(18)  |
| O(2)-P-C(6)-C(5)       | 107.82(13)  |
| C(15)-P-C(6)-C(5)      | -126.99(12) |
| C(7)-P-C(6)-C(5)       | -12.42(14)  |
| O(2)-P-C(7)-C(12)      | 154.06(15)  |
| C(15)-P-C(7)-C(12)     | 32.34(17)   |
| C(6)-P-C(7)-C(12)      | -84.42(16)  |
| O(2)-P-C(7)-C(8)       | -26.37(15)  |
| C(15)-P-C(7)-C(8)      | -148.09(13) |
| C(6)-P-C(7)-C(8)       | 95.15(14)   |
| C(12)-C(7)-C(8)-C(9)   | 1.0(3)      |
| P-C(7)-C(8)-C(9)       | -178.64(14) |
| C(7)-C(8)-C(9)-C(10)   | -0.2(3)     |
| C(7)-C(8)-C(9)-C(13)   | 178.24(18)  |
| C(8)-C(9)-C(10)-C(11)  | -0.4(3)     |
| C(13)-C(9)-C(10)-C(11) | -178.9(2)   |
| C(9)-C(10)-C(11)-C(12) | 0.3(3)      |
| C(9)-C(10)-C(11)-C(14) | 178.6(2)    |
| C(8)-C(7)-C(12)-C(11)  | -1.0(3)     |
| P-C(7)-C(12)-C(11)     | 178.52(14)  |
| C(10)-C(11)-C(12)-C(7) | 0.4(3)      |
| C(14)-C(11)-C(12)-C(7) | -177.9(2)   |



|                         |             |
|-------------------------|-------------|
| C(10)-C(9)-C(13)-F(1)   | 81.0(3)     |
| C(8)-C(9)-C(13)-F(1)    | -97.5(3)    |
| C(10)-C(9)-C(13)-F(3)   | -157.7(2)   |
| C(8)-C(9)-C(13)-F(3)    | 23.8(3)     |
| C(10)-C(9)-C(13)-F(2)   | -38.1(3)    |
| C(8)-C(9)-C(13)-F(2)    | 143.4(2)    |
| C(10)-C(11)-C(14)-F(6)  | -71.9(3)    |
| C(12)-C(11)-C(14)-F(6)  | 106.4(3)    |
| C(10)-C(11)-C(14)-F(4)  | 164.4(3)    |
| C(12)-C(11)-C(14)-F(4)  | -17.3(4)    |
| C(10)-C(11)-C(14)-F(5)  | 44.8(3)     |
| C(12)-C(11)-C(14)-F(5)  | -136.9(2)   |
| O(2)-P-C(15)-C(16)      | 169.17(13)  |
| C(7)-P-C(15)-C(16)      | -70.89(15)  |
| C(6)-P-C(15)-C(16)      | 44.42(16)   |
| O(2)-P-C(15)-C(20)      | -15.69(16)  |
| C(7)-P-C(15)-C(20)      | 104.25(14)  |
| C(6)-P-C(15)-C(20)      | -140.45(13) |
| C(20)-C(15)-C(16)-C(17) | -0.9(3)     |
| P-C(15)-C(16)-C(17)     | 174.09(14)  |
| C(15)-C(16)-C(17)-C(18) | 1.9(3)      |
| C(15)-C(16)-C(17)-C(21) | -174.02(17) |
| C(16)-C(17)-C(18)-C(19) | -1.0(3)     |
| C(21)-C(17)-C(18)-C(19) | 174.84(19)  |
| C(17)-C(18)-C(19)-C(20) | -0.9(3)     |
| C(17)-C(18)-C(19)-C(22) | -177.8(2)   |
| C(18)-C(19)-C(20)-C(15) | 1.8(3)      |
| C(22)-C(19)-C(20)-C(15) | 178.7(2)    |
| C(16)-C(15)-C(20)-C(19) | -0.9(3)     |
| P-C(15)-C(20)-C(19)     | -176.10(14) |
| C(18)-C(17)-C(21)-F(9)  | -87.3(4)    |
| C(16)-C(17)-C(21)-F(9)  | 88.6(4)     |
| C(18)-C(17)-C(21)-F(7A) | -2.5(5)     |
| C(16)-C(17)-C(21)-F(7A) | 173.4(4)    |
| C(18)-C(17)-C(21)-F(7)  | 141.8(6)    |
| C(16)-C(17)-C(21)-F(7)  | -42.3(7)    |

|                          |           |
|--------------------------|-----------|
| C(18)-C(17)-C(21)-F(9A)  | 131.6(7)  |
| C(16)-C(17)-C(21)-F(9A)  | -52.5(7)  |
| C(18)-C(17)-C(21)-F(8)   | 30.5(4)   |
| C(16)-C(17)-C(21)-F(8)   | -153.6(3) |
| C(18)-C(17)-C(21)-F(8A)  | -117.9(4) |
| C(16)-C(17)-C(21)-F(8A)  | 58.0(4)   |
| C(18)-C(19)-C(22)-F(10A) | 77.2(11)  |
| C(20)-C(19)-C(22)-F(10A) | -99.8(11) |
| C(18)-C(19)-C(22)-F(10)  | -136.9(4) |
| C(20)-C(19)-C(22)-F(10)  | 46.1(5)   |
| C(18)-C(19)-C(22)-F(11)  | -7.1(5)   |
| C(20)-C(19)-C(22)-F(11)  | 175.9(4)  |
| C(18)-C(19)-C(22)-F(11A) | -150.7(5) |
| C(20)-C(19)-C(22)-F(11A) | 32.2(6)   |
| C(18)-C(19)-C(22)-F(12)  | 107.6(4)  |
| C(20)-C(19)-C(22)-F(12)  | -69.4(4)  |
| C(18)-C(19)-C(22)-F(12A) | -50.9(6)  |
| C(20)-C(19)-C(22)-F(12A) | 132.0(5)  |

---

Table 7. Possible Hydrogen bonds for rpsl22 [ $\text{\AA}$  and  $^\circ$ ].

| D-H...A              | d(D-H) | d(H...A) | d(D...A) | $\angle(\text{DHA})$ |
|----------------------|--------|----------|----------|----------------------|
| C(4)-H(4)...O(2)#1   | 0.94   | 2.40     | 3.240(2) | 147.9                |
| C(6)-H(6A)...O(2)#2  | 0.98   | 2.52     | 3.334(2) | 140.7                |
| C(6)-H(6B)...O(2)#1  | 0.98   | 2.50     | 3.380(2) | 149.1                |
| C(8)-H(8)...O(2)     | 0.94   | 2.59     | 2.992(2) | 105.9                |
| C(12)-H(12)...O(1)   | 0.94   | 2.58     | 2.936(2) | 102.8                |
| C(16)-H(16)...O(1)   | 0.94   | 2.31     | 3.163(2) | 151.4                |
| C(20)-H(20)...O(1)#3 | 0.94   | 2.47     | 3.314(2) | 149.9                |

Symmetry transformations used to generate equivalent atoms:

#1 -x,-y,-z #2 x,-y,z-1/2 #3 x,-y,z+1/2

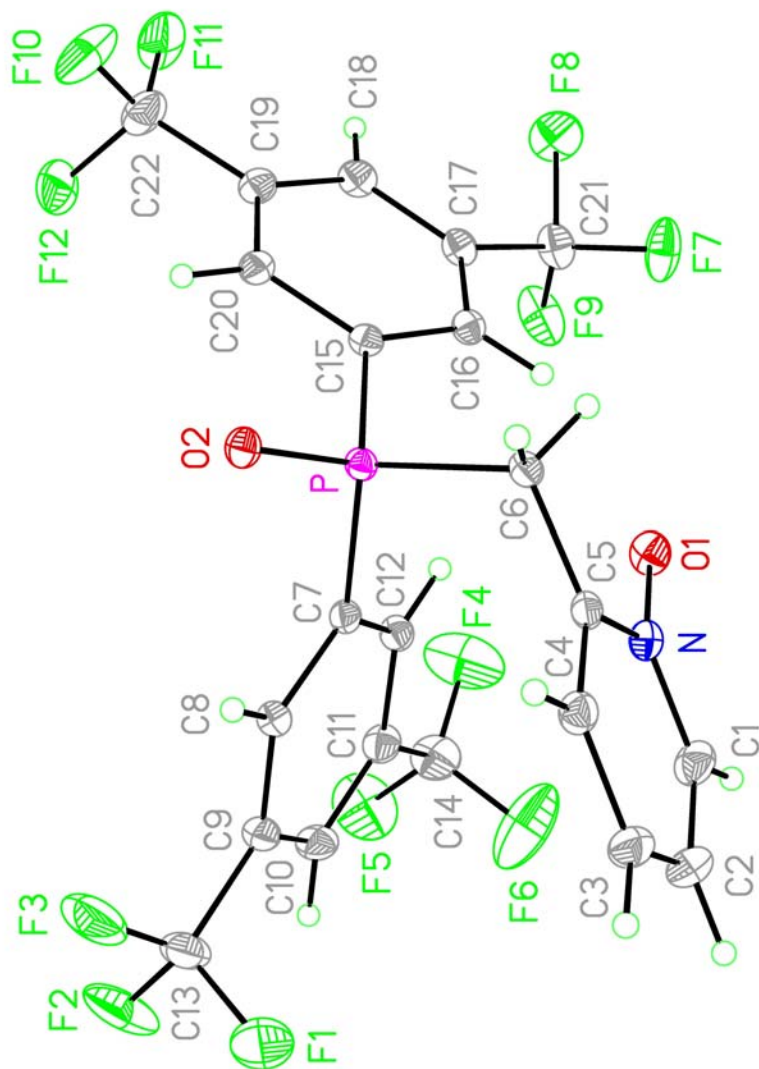

Figure 1. rpsl2211.jpg, Single molecule view, 20% thermal displacement ellipsoids 20%,  
rpsl2211b.jpg=b/w only major disorder part is shown. F7-F9 [51% occupancy] and F10-F12[63%  
occupancy].

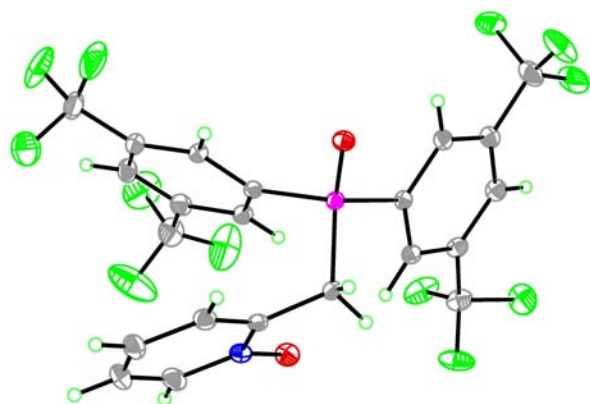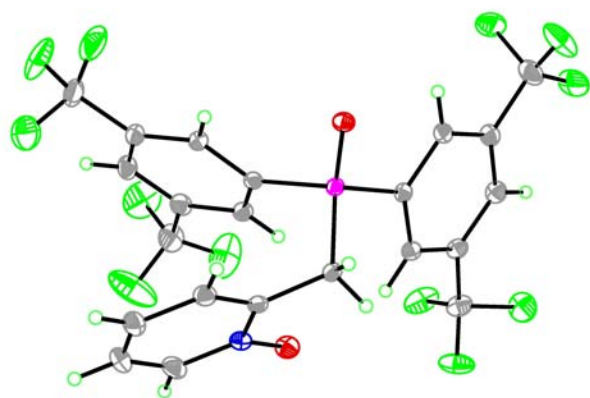

Figure 4.rpsl22s1.jpg also rpsl22s1b.jpg[b/w], stereoview of rpsl2211.

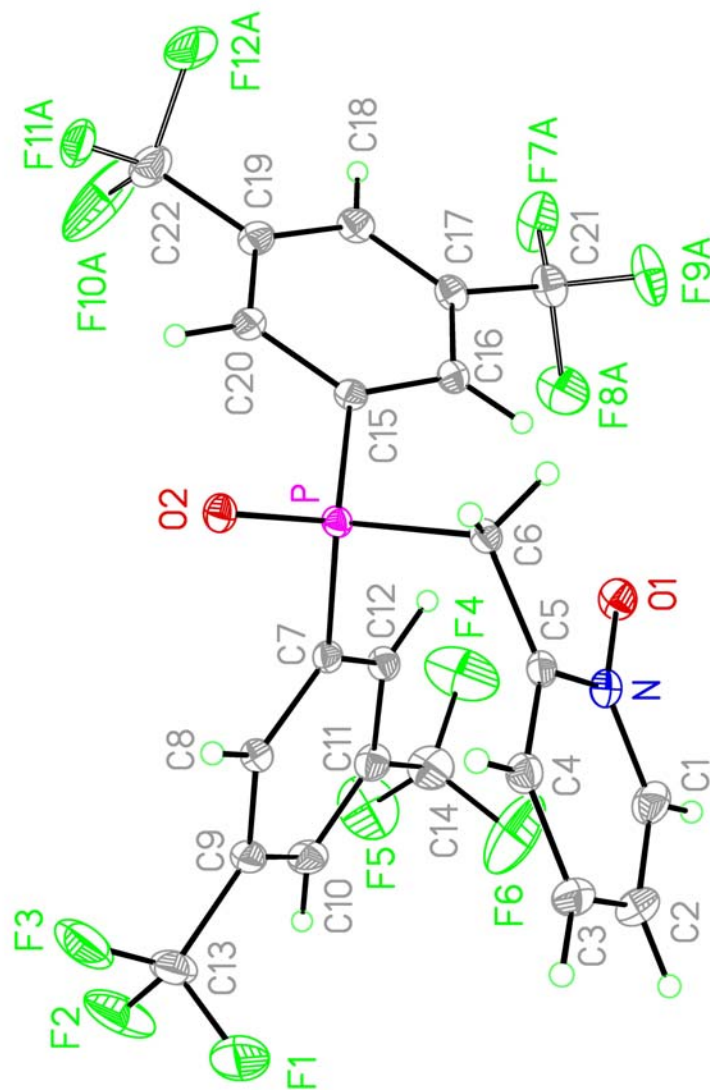

Figure 3 rps12212.jpg molecule showing minor disorder positions: F7a-F9a [49% occupancy], F10a-F12a [37% occupancy].

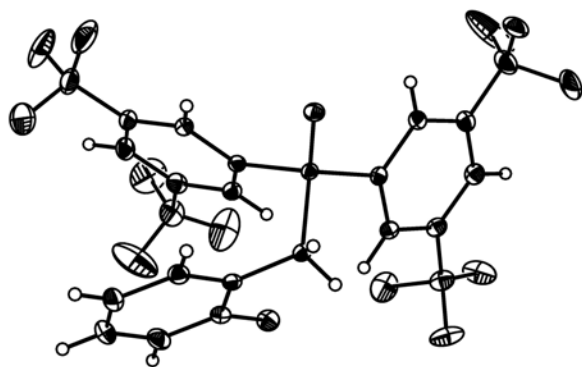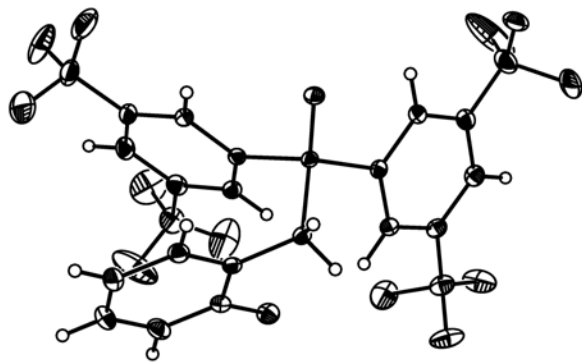

Figure 4. rpsl22s2b.jpg stereoview molecule showing minor disorder positions, b/w only

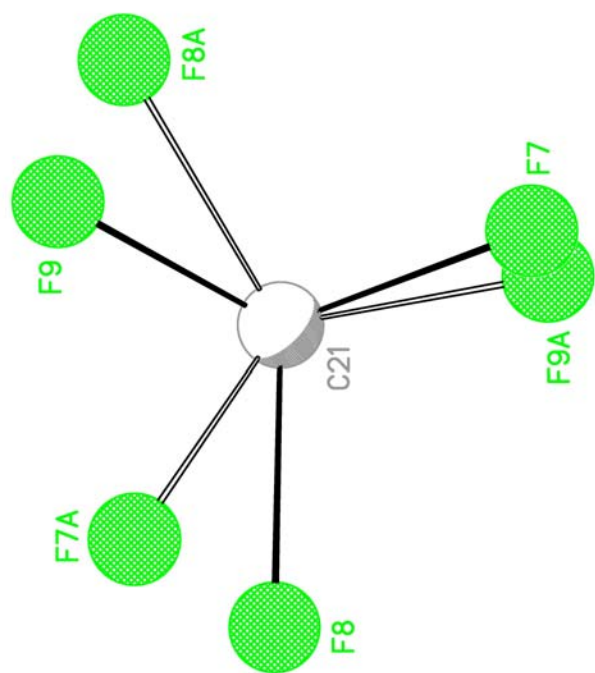

rpsl22 disorder of F's at C21. Occupancy F7-F9 is 51%, Occupancy F7a-F9a is 49%.

Figure 5. rpsl22c21p.jpg [rpsl22c21.jpg no notes] superposition of F's about C21



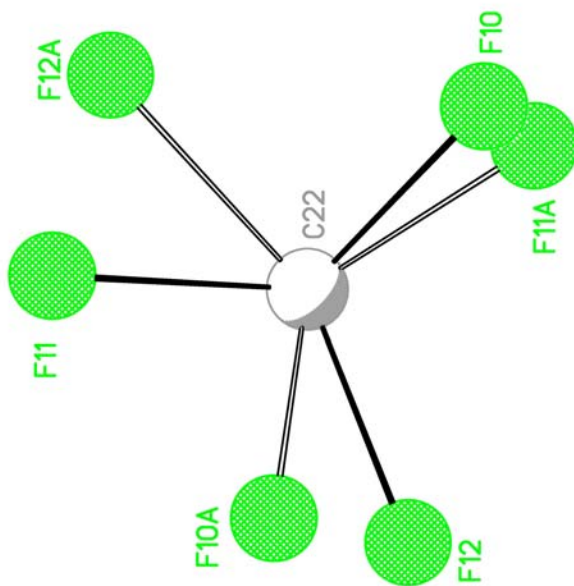

rpsl22 disorder of F's about C22. Occupancy of F10-F12 is 63% and F10a-F12a is 37%

Figure 6. rpsl22c22p.jpg [rpsl22c22.jpg no notes] superposition of F's about C22

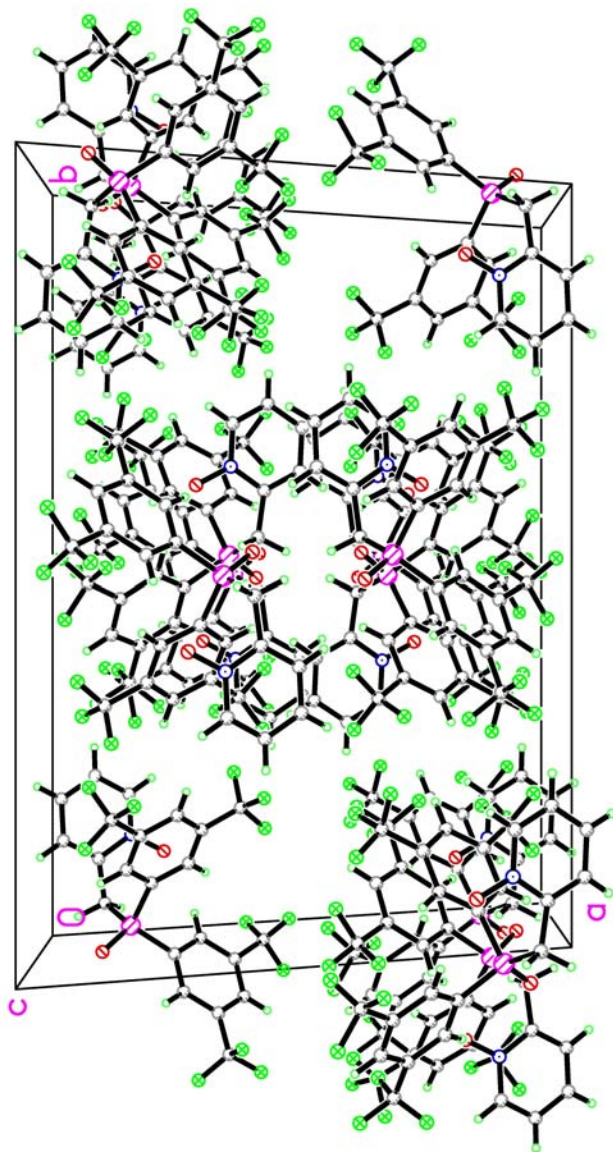

Figure 7.rpsl22cl.jpg packing view down c-axis, color, also rpsl22clb.jpg b/w, only major disorder positions shown

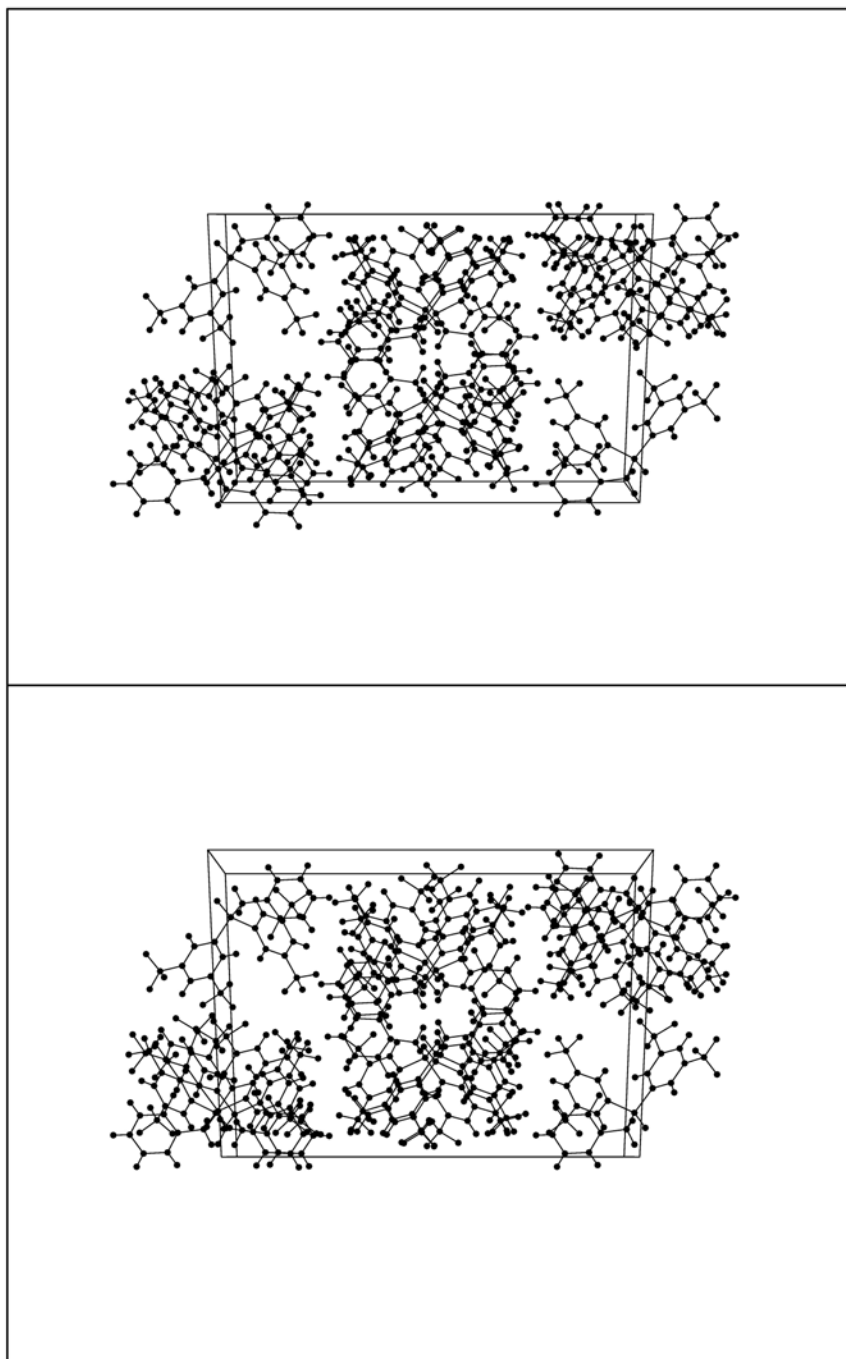

Figure 8. rpsl22cs.jpg stereoview packing, down c-axis, only major disorder positions shown

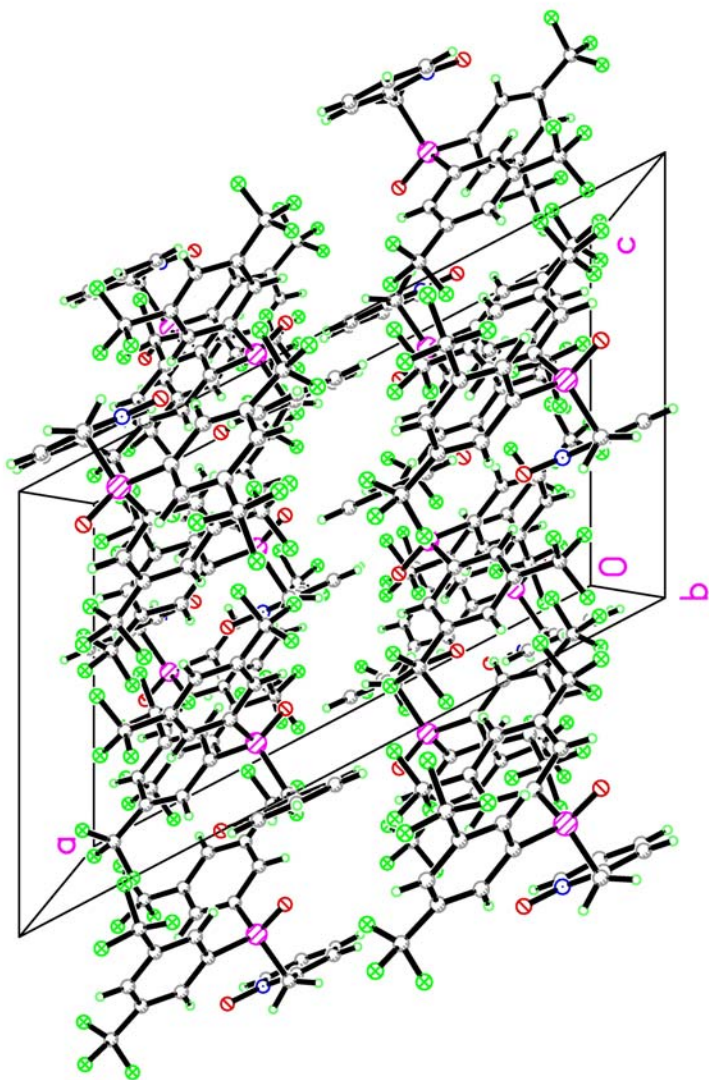

Figure 9.rpsl22bl.jpg packing view down b-axis, color, also rpsl22blb.jpg b/w, also see rpsl22bs.jpg only major disorder position shown

X-ray Crystallographic data for [Yb(1c)(NO<sub>3</sub>)<sub>3</sub>(DMF)](DMF)(H<sub>2</sub>O)<sub>1/2</sub>.

# Crystal Structure Report

Prepared for:

Professor R.Paine/C.Edicome  
[rtpaine@unm.edu](mailto:rtpaine@unm.edu), [cedicome@unm.edu](mailto:cedicome@unm.edu)

Compound:

rpec17/SLP.12.10.Yb1.1  
[C<sub>22</sub> H<sub>14</sub> F<sub>6</sub> N O<sub>2</sub> P]Yb[NO<sub>3</sub>]<sub>3</sub>[C<sub>3</sub>H<sub>7</sub>NO]<sub>2</sub>·0.5H<sub>2</sub>O

Prepared by:

Eileen Duesler

[Duesler@unm.edu](mailto:Duesler@unm.edu)

277-6649

Issue date:

June 27 2007

Rpec1711.jpg,\$287=225+2[61-30]

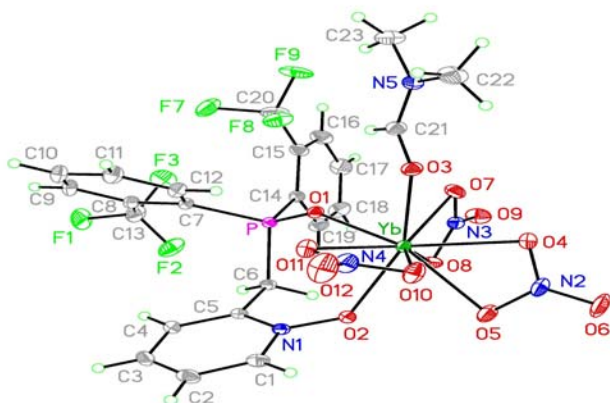

Table 1. Crystal data and structure refinement for rpec17.

|                                   |                                                                                                              |
|-----------------------------------|--------------------------------------------------------------------------------------------------------------|
| Identification code               | rpec17                                                                                                       |
| Empirical formula                 | C <sub>26</sub> H <sub>29</sub> F <sub>6</sub> N <sub>6</sub> O <sub>13.50</sub> P Yb                        |
| Formula weight                    | 959.56                                                                                                       |
| Temperature                       | 225(2) K                                                                                                     |
| Wavelength                        | 0.71073 Å                                                                                                    |
| Crystal system                    | Monoclinic                                                                                                   |
| Space group                       | C2/c                                                                                                         |
| Unit cell dimensions              | a = 29.2303(17) Å      α = 90°.<br>b = 13.5964(8) Å      β = 124.507(2)°.<br>c = 21.6915(12) Å      γ = 90°. |
| Volume                            | 7104.0(7) Å <sup>3</sup>                                                                                     |
| Z                                 | 8                                                                                                            |
| Density (calculated)              | 1.794 Mg/m <sup>3</sup>                                                                                      |
| Absorption coefficient            | 2.781 mm <sup>-1</sup>                                                                                       |
| F(000)                            | 3792                                                                                                         |
| Crystal size                      | 0.13 x 0.12 x 0.09 mm <sup>3</sup>                                                                           |
| Theta range for data collection   | 2.59 to 32.70°.                                                                                              |
| Index ranges                      | -44 ≤ h ≤ 41, -20 ≤ k ≤ 18, -32 ≤ l ≤ 32                                                                     |
| Reflections collected             | 100265                                                                                                       |
| Independent reflections           | 13060 [R(int) = 0.0336]                                                                                      |
| Completeness to theta = 32.70°    | 99.8 %                                                                                                       |
| Absorption correction             | Semi-empirical from equivalents                                                                              |
| Max. and min. transmission        | 0.780 and 0.720                                                                                              |
| Refinement method                 | Full-matrix least-squares on F <sup>2</sup>                                                                  |
| Data / restraints / parameters    | 13060 / 0 / 554                                                                                              |
| Goodness-of-fit on F <sup>2</sup> | 1.010                                                                                                        |
| Final R indices [I > 2σ(I)]       | R1 = 0.0204, wR2 = 0.0463                                                                                    |
| R indices (all data)              | R1 = 0.0293, wR2 = 0.0500                                                                                    |
| Largest diff. peak and hole       | 0.882 and -0.340 e.Å <sup>-3</sup>                                                                           |

Table 2. Atomic coordinates ( $\times 10^4$ ) and equivalent isotropic displacement parameters ( $\text{\AA}^2 \times 10^3$ ) for rpec17.  $U(\text{eq})$  is defined as one third of the trace of the orthogonalized  $U^{\text{ij}}$  tensor.

|       | x       | y        | z        | $U(\text{eq})$ |
|-------|---------|----------|----------|----------------|
| Yb    | 7449(1) | 9874(1)  | 9302(1)  | 24(1)          |
| P     | 6649(1) | 9358(1)  | 10027(1) | 24(1)          |
| O(1)  | 6851(1) | 9947(1)  | 9640(1)  | 28(1)          |
| O(2)  | 7944(1) | 8928(1)  | 10342(1) | 31(1)          |
| O(3)  | 7040(1) | 11297(1) | 8707(1)  | 37(1)          |
| O(4)  | 7570(1) | 9881(1)  | 8292(1)  | 53(1)          |
| O(5)  | 8068(1) | 8868(1)  | 9178(1)  | 50(1)          |
| O(6)  | 8145(1) | 8946(2)  | 8244(1)  | 83(1)          |
| O(7)  | 6534(1) | 9421(1)  | 8150(1)  | 41(1)          |
| O(8)  | 7028(1) | 8273(1)  | 8921(1)  | 39(1)          |
| O(9)  | 6251(1) | 7914(1)  | 7876(1)  | 52(1)          |
| O(10) | 8247(1) | 10862(1) | 9713(1)  | 48(1)          |
| O(11) | 7870(1) | 11080(1) | 10310(1) | 43(1)          |
| O(12) | 8554(1) | 12014(1) | 10544(1) | 79(1)          |
| N(1)  | 8068(1) | 9063(1)  | 11029(1) | 27(1)          |
| N(2)  | 7933(1) | 9223(1)  | 8559(1)  | 44(1)          |
| N(3)  | 6590(1) | 8517(1)  | 8300(1)  | 31(1)          |
| N(4)  | 8234(1) | 11340(1) | 10205(1) | 46(1)          |
| N(5)  | 6321(1) | 12318(1) | 7986(1)  | 38(1)          |
| C(1)  | 8581(1) | 9393(1)  | 11564(1) | 37(1)          |
| C(2)  | 8740(1) | 9510(1)  | 12289(1) | 45(1)          |
| C(3)  | 8368(1) | 9301(1)  | 12466(1) | 45(1)          |
| C(4)  | 7846(1) | 8962(1)  | 11914(1) | 38(1)          |
| C(5)  | 7697(1) | 8825(1)  | 11189(1) | 27(1)          |
| C(6)  | 7153(1) | 8406(1)  | 10581(1) | 27(1)          |
| C(7)  | 6611(1) | 10179(1) | 10661(1) | 30(1)          |
| C(8)  | 6395(1) | 9988(1)  | 11086(1) | 39(1)          |
| C(9)  | 6420(1) | 10722(2) | 11554(1) | 54(1)          |
| C(10) | 6650(1) | 11620(2) | 11606(1) | 59(1)          |
| C(11) | 6864(1) | 11817(2) | 11196(1) | 52(1)          |
| C(12) | 6843(1) | 11097(1) | 10727(1) | 39(1)          |

|       |          |           |           |        |
|-------|----------|-----------|-----------|--------|
| C(13) | 6119(1)  | 9044(2)   | 11052(2)  | 58(1)  |
| F(1)  | 6049(2)  | 8929(6)   | 11596(3)  | 77(1)  |
| F(2)  | 6351(1)  | 8248(2)   | 11008(2)  | 68(1)  |
| F(3)  | 5585(1)  | 8985(2)   | 10402(2)  | 70(1)  |
| F(4)  | 6639(5)  | 8430(9)   | 11611(11) | 154(6) |
| F(5)  | 5972(11) | 8553(11)  | 10597(8)  | 170(9) |
| F(6)  | 5954(7)  | 9030(20)  | 11472(13) | 83(6)  |
| C(14) | 5999(1)  | 8736(1)   | 9372(1)   | 30(1)  |
| C(15) | 5480(1)  | 9198(1)   | 8880(1)   | 38(1)  |
| C(16) | 5018(1)  | 8637(2)   | 8389(1)   | 53(1)  |
| C(17) | 5051(1)  | 7632(2)   | 8366(1)   | 57(1)  |
| C(18) | 5548(1)  | 7169(2)   | 8838(1)   | 53(1)  |
| C(19) | 6018(1)  | 7718(1)   | 9331(1)   | 41(1)  |
| C(20) | 5389(1)  | 10285(2)  | 8877(2)   | 58(1)  |
| F(7)  | 5305(1)  | 10538(2)  | 9436(2)   | 73(1)  |
| F(8)  | 5817(2)  | 10841(4)  | 9067(3)   | 60(1)  |
| F(9)  | 4949(1)  | 10623(2)  | 8273(2)   | 84(1)  |
| F(10) | 5296(6)  | 10507(6)  | 8096(4)   | 132(4) |
| F(11) | 4964(5)  | 10479(7)  | 8723(12)  | 149(7) |
| F(12) | 5791(6)  | 10809(10) | 9200(9)   | 69(4)  |
| C(21) | 6554(1)  | 11556(1)  | 8426(1)   | 38(1)  |
| C(22) | 6635(1)  | 12935(2)  | 7816(2)   | 61(1)  |
| C(23) | 5757(1)  | 12610(2)  | 7702(2)   | 62(1)  |
| O(13) | 5052(1)  | 4489(2)   | 6343(1)   | 110(1) |
| N(6)  | 4896(1)  | 3658(2)   | 5349(1)   | 79(1)  |
| C(24) | 4757(1)  | 4015(3)   | 5782(2)   | 86(1)  |
| C(25) | 5441(2)  | 3826(3)   | 5522(2)   | 110(1) |
| C(26) | 4515(2)  | 3075(4)   | 4690(3)   | 160(2) |
| O(14) | 5000     | 5257(19)  | 7500      | 72(15) |
| O(15) | 4836(17) | 5123(14)  | 7270(20)  | 87(7)  |

---



Table 3. Bond lengths [ $\text{\AA}$ ] and angles [ $^\circ$ ] for rpec17.

---

|            |            |
|------------|------------|
| Yb-O(1)    | 2.2499(11) |
| Yb-O(3)    | 2.2575(11) |
| Yb-O(2)    | 2.2660(11) |
| Yb-O(10)   | 2.3831(13) |
| Yb-O(5)    | 2.3997(13) |
| Yb-O(8)    | 2.4055(12) |
| Yb-O(4)    | 2.4079(14) |
| Yb-O(11)   | 2.4362(13) |
| Yb-O(7)    | 2.4908(13) |
| P-O(1)     | 1.5016(11) |
| P-C(6)     | 1.8123(14) |
| P-C(14)    | 1.8127(17) |
| P-C(7)     | 1.8236(16) |
| O(2)-N(1)  | 1.3318(16) |
| O(3)-C(21) | 1.238(2)   |
| O(4)-N(2)  | 1.252(2)   |
| O(5)-N(2)  | 1.262(2)   |
| O(6)-N(2)  | 1.2145(19) |
| O(7)-N(3)  | 1.2591(18) |
| O(8)-N(3)  | 1.2682(17) |
| O(9)-N(3)  | 1.2118(19) |
| O(10)-N(4) | 1.267(2)   |
| O(11)-N(4) | 1.261(2)   |
| O(12)-N(4) | 1.215(2)   |
| N(1)-C(1)  | 1.351(2)   |
| N(1)-C(5)  | 1.353(2)   |
| N(5)-C(21) | 1.308(2)   |
| N(5)-C(22) | 1.439(3)   |
| N(5)-C(23) | 1.450(3)   |
| C(1)-C(2)  | 1.374(3)   |
| C(1)-H(1)  | 0.9400     |
| C(2)-C(3)  | 1.373(3)   |
| C(2)-H(2)  | 0.9400     |
| C(3)-C(4)  | 1.381(3)   |

|             |           |
|-------------|-----------|
| C(3)-H(3)   | 0.9400    |
| C(4)-C(5)   | 1.386(2)  |
| C(4)-H(4)   | 0.9400    |
| C(5)-C(6)   | 1.489(2)  |
| C(6)-H(6A)  | 0.9800    |
| C(6)-H(6B)  | 0.9800    |
| C(7)-C(12)  | 1.388(2)  |
| C(7)-C(8)   | 1.407(2)  |
| C(8)-C(9)   | 1.395(3)  |
| C(8)-C(13)  | 1.495(3)  |
| C(9)-C(10)  | 1.368(4)  |
| C(9)-H(9)   | 0.9400    |
| C(10)-C(11) | 1.372(3)  |
| C(10)-H(10) | 0.9400    |
| C(11)-C(12) | 1.388(3)  |
| C(11)-H(11) | 0.9400    |
| C(12)-H(12) | 0.9400    |
| C(13)-F(5)  | 1.060(10) |
| C(13)-F(6)  | 1.249(16) |
| C(13)-F(2)  | 1.310(3)  |
| C(13)-F(1)  | 1.316(5)  |
| C(13)-F(3)  | 1.391(4)  |
| C(13)-F(4)  | 1.547(11) |
| C(14)-C(19) | 1.390(2)  |
| C(14)-C(15) | 1.414(2)  |
| C(15)-C(16) | 1.383(3)  |
| C(15)-C(20) | 1.501(3)  |
| C(16)-C(17) | 1.372(3)  |
| C(16)-H(16) | 0.9400    |
| C(17)-C(18) | 1.368(3)  |
| C(17)-H(17) | 0.9400    |
| C(18)-C(19) | 1.386(3)  |
| C(18)-H(18) | 0.9400    |
| C(19)-H(19) | 0.9400    |
| C(20)-F(11) | 1.119(7)  |
| C(20)-F(12) | 1.203(14) |

|               |           |
|---------------|-----------|
| C(20)-F(9)    | 1.293(3)  |
| C(20)-F(8)    | 1.312(5)  |
| C(20)-F(7)    | 1.408(4)  |
| C(20)-F(10)   | 1.585(8)  |
| C(21)-H(21)   | 0.9400    |
| C(22)-H(22A)  | 0.9700    |
| C(22)-H(22B)  | 0.9700    |
| C(22)-H(22C)  | 0.9700    |
| C(23)-H(23A)  | 0.9700    |
| C(23)-H(23B)  | 0.9700    |
| C(23)-H(23C)  | 0.9700    |
| O(13)-C(24)   | 1.206(4)  |
| N(6)-C(24)    | 1.309(4)  |
| N(6)-C(25)    | 1.433(4)  |
| N(6)-C(26)    | 1.452(4)  |
| C(24)-H(24)   | 0.9400    |
| C(25)-H(25A)  | 0.9700    |
| C(25)-H(25B)  | 0.9700    |
| C(25)-H(25C)  | 0.9700    |
| C(26)-H(26A)  | 0.9700    |
| C(26)-H(26B)  | 0.9700    |
| C(26)-H(26C)  | 0.9700    |
| O(14)-H(1W)   | 0.94(5)   |
| O(15)-H(1W)   | 0.72(6)   |
| O(1)-Yb-O(3)  | 83.72(4)  |
| O(1)-Yb-O(2)  | 82.88(4)  |
| O(3)-Yb-O(2)  | 152.69(4) |
| O(1)-Yb-O(10) | 129.01(4) |
| O(3)-Yb-O(10) | 79.63(5)  |
| O(2)-Yb-O(10) | 90.59(5)  |
| O(1)-Yb-O(5)  | 146.67(4) |
| O(3)-Yb-O(5)  | 127.84(4) |
| O(2)-Yb-O(5)  | 72.04(4)  |
| O(10)-Yb-O(5) | 73.99(5)  |
| O(1)-Yb-O(8)  | 79.11(4)  |

|                |            |
|----------------|------------|
| O(3)-Yb-O(8)   | 125.22(4)  |
| O(2)-Yb-O(8)   | 75.08(4)   |
| O(10)-Yb-O(8)  | 147.21(5)  |
| O(5)-Yb-O(8)   | 73.56(5)   |
| O(1)-Yb-O(4)   | 146.92(5)  |
| O(3)-Yb-O(4)   | 77.23(5)   |
| O(2)-Yb-O(4)   | 124.63(4)  |
| O(10)-Yb-O(4)  | 73.86(5)   |
| O(5)-Yb-O(4)   | 52.63(5)   |
| O(8)-Yb-O(4)   | 90.05(5)   |
| O(1)-Yb-O(11)  | 76.54(4)   |
| O(3)-Yb-O(11)  | 76.76(5)   |
| O(2)-Yb-O(11)  | 77.03(5)   |
| O(10)-Yb-O(11) | 52.83(4)   |
| O(5)-Yb-O(11)  | 117.09(5)  |
| O(8)-Yb-O(11)  | 144.82(4)  |
| O(4)-Yb-O(11)  | 123.69(5)  |
| O(1)-Yb-O(7)   | 75.32(4)   |
| O(3)-Yb-O(7)   | 73.60(4)   |
| O(2)-Yb-O(7)   | 125.12(4)  |
| O(10)-Yb-O(7)  | 141.40(5)  |
| O(5)-Yb-O(7)   | 101.29(5)  |
| O(8)-Yb-O(7)   | 51.80(4)   |
| O(4)-Yb-O(7)   | 73.47(5)   |
| O(11)-Yb-O(7)  | 140.85(4)  |
| O(1)-P-C(6)    | 108.82(7)  |
| O(1)-P-C(14)   | 112.37(7)  |
| C(6)-P-C(14)   | 106.51(7)  |
| O(1)-P-C(7)    | 107.80(7)  |
| C(6)-P-C(7)    | 108.10(7)  |
| C(14)-P-C(7)   | 113.10(7)  |
| P-O(1)-Yb      | 141.54(6)  |
| N(1)-O(2)-Yb   | 130.63(9)  |
| C(21)-O(3)-Yb  | 127.86(11) |
| N(2)-O(4)-Yb   | 95.65(11)  |
| N(2)-O(5)-Yb   | 95.76(10)  |

|                  |            |
|------------------|------------|
| N(3)-O(7)-Yb     | 94.26(9)   |
| N(3)-O(8)-Yb     | 98.10(9)   |
| N(4)-O(10)-Yb    | 96.62(10)  |
| N(4)-O(11)-Yb    | 94.27(10)  |
| O(2)-N(1)-C(1)   | 118.26(14) |
| O(2)-N(1)-C(5)   | 120.32(12) |
| C(1)-N(1)-C(5)   | 121.33(14) |
| O(6)-N(2)-O(4)   | 122.06(18) |
| O(6)-N(2)-O(5)   | 121.99(18) |
| O(4)-N(2)-O(5)   | 115.95(14) |
| O(9)-N(3)-O(7)   | 122.30(14) |
| O(9)-N(3)-O(8)   | 121.95(15) |
| O(7)-N(3)-O(8)   | 115.74(14) |
| O(12)-N(4)-O(11) | 122.76(18) |
| O(12)-N(4)-O(10) | 121.19(18) |
| O(11)-N(4)-O(10) | 116.05(15) |
| C(21)-N(5)-C(22) | 120.33(17) |
| C(21)-N(5)-C(23) | 121.59(17) |
| C(22)-N(5)-C(23) | 117.91(17) |
| N(1)-C(1)-C(2)   | 120.86(17) |
| N(1)-C(1)-H(1)   | 119.6      |
| C(2)-C(1)-H(1)   | 119.6      |
| C(3)-C(2)-C(1)   | 119.29(17) |
| C(3)-C(2)-H(2)   | 120.4      |
| C(1)-C(2)-H(2)   | 120.4      |
| C(2)-C(3)-C(4)   | 119.22(17) |
| C(2)-C(3)-H(3)   | 120.4      |
| C(4)-C(3)-H(3)   | 120.4      |
| C(3)-C(4)-C(5)   | 120.71(17) |
| C(3)-C(4)-H(4)   | 119.6      |
| C(5)-C(4)-H(4)   | 119.6      |
| N(1)-C(5)-C(4)   | 118.55(15) |
| N(1)-C(5)-C(6)   | 118.29(13) |
| C(4)-C(5)-C(6)   | 123.14(15) |
| C(5)-C(6)-P      | 111.89(10) |
| C(5)-C(6)-H(6A)  | 109.2      |

|                   |            |
|-------------------|------------|
| P-C(6)-H(6A)      | 109.2      |
| C(5)-C(6)-H(6B)   | 109.2      |
| P-C(6)-H(6B)      | 109.2      |
| H(6A)-C(6)-H(6B)  | 107.9      |
| C(12)-C(7)-C(8)   | 118.27(16) |
| C(12)-C(7)-P      | 113.14(12) |
| C(8)-C(7)-P       | 128.57(14) |
| C(9)-C(8)-C(7)    | 119.15(19) |
| C(9)-C(8)-C(13)   | 117.05(18) |
| C(7)-C(8)-C(13)   | 123.77(17) |
| C(10)-C(9)-C(8)   | 121.2(2)   |
| C(10)-C(9)-H(9)   | 119.4      |
| C(8)-C(9)-H(9)    | 119.4      |
| C(9)-C(10)-C(11)  | 120.32(19) |
| C(9)-C(10)-H(10)  | 119.8      |
| C(11)-C(10)-H(10) | 119.8      |
| C(10)-C(11)-C(12) | 119.4(2)   |
| C(10)-C(11)-H(11) | 120.3      |
| C(12)-C(11)-H(11) | 120.3      |
| C(7)-C(12)-C(11)  | 121.66(18) |
| C(7)-C(12)-H(12)  | 119.2      |
| C(11)-C(12)-H(12) | 119.2      |
| F(5)-C(13)-F(6)   | 123.5(15)  |
| F(5)-C(13)-F(2)   | 50.5(14)   |
| F(6)-C(13)-F(2)   | 118.2(12)  |
| F(5)-C(13)-F(1)   | 125.0(7)   |
| F(6)-C(13)-F(1)   | 12.7(12)   |
| F(2)-C(13)-F(1)   | 108.5(4)   |
| F(5)-C(13)-F(3)   | 52.5(15)   |
| F(6)-C(13)-F(3)   | 93.7(10)   |
| F(2)-C(13)-F(3)   | 102.0(3)   |
| F(1)-C(13)-F(3)   | 104.4(3)   |
| F(5)-C(13)-C(8)   | 120.7(5)   |
| F(6)-C(13)-C(8)   | 113.2(13)  |
| F(2)-C(13)-C(8)   | 115.2(2)   |
| F(1)-C(13)-C(8)   | 114.2(4)   |

|                   |            |
|-------------------|------------|
| F(3)-C(13)-C(8)   | 111.4(2)   |
| F(5)-C(13)-F(4)   | 95.1(14)   |
| F(6)-C(13)-F(4)   | 92.0(12)   |
| F(2)-C(13)-F(4)   | 44.8(7)    |
| F(1)-C(13)-F(4)   | 79.4(7)    |
| F(3)-C(13)-F(4)   | 143.5(7)   |
| C(8)-C(13)-F(4)   | 99.2(5)    |
| C(19)-C(14)-C(15) | 117.34(16) |
| C(19)-C(14)-P     | 116.89(12) |
| C(15)-C(14)-P     | 125.72(14) |
| C(16)-C(15)-C(14) | 119.88(18) |
| C(16)-C(15)-C(20) | 116.48(18) |
| C(14)-C(15)-C(20) | 123.58(17) |
| C(17)-C(16)-C(15) | 121.23(19) |
| C(17)-C(16)-H(16) | 119.4      |
| C(15)-C(16)-H(16) | 119.4      |
| C(18)-C(17)-C(16) | 119.9(2)   |
| C(18)-C(17)-H(17) | 120.0      |
| C(16)-C(17)-H(17) | 120.0      |
| C(17)-C(18)-C(19) | 119.8(2)   |
| C(17)-C(18)-H(18) | 120.1      |
| C(19)-C(18)-H(18) | 120.1      |
| C(18)-C(19)-C(14) | 121.80(18) |
| C(18)-C(19)-H(19) | 119.1      |
| C(14)-C(19)-H(19) | 119.1      |
| F(11)-C(20)-F(12) | 126.0(10)  |
| F(11)-C(20)-F(9)  | 46.9(10)   |
| F(12)-C(20)-F(9)  | 117.5(8)   |
| F(11)-C(20)-F(8)  | 131.1(6)   |
| F(12)-C(20)-F(8)  | 14.7(10)   |
| F(9)-C(20)-F(8)   | 109.7(4)   |
| F(11)-C(20)-F(7)  | 59.7(11)   |
| F(12)-C(20)-F(7)  | 86.7(8)    |
| F(9)-C(20)-F(7)   | 103.2(2)   |
| F(8)-C(20)-F(7)   | 100.8(3)   |
| F(11)-C(20)-C(15) | 113.4(6)   |

|                     |            |
|---------------------|------------|
| F(12)-C(20)-C(15)   | 117.8(7)   |
| F(9)-C(20)-C(15)    | 115.3(3)   |
| F(8)-C(20)-C(15)    | 115.5(3)   |
| F(7)-C(20)-C(15)    | 110.7(2)   |
| F(11)-C(20)-F(10)   | 98.4(11)   |
| F(12)-C(20)-F(10)   | 91.7(9)    |
| F(9)-C(20)-F(10)    | 51.6(5)    |
| F(8)-C(20)-F(10)    | 77.4(5)    |
| F(7)-C(20)-F(10)    | 149.9(5)   |
| C(15)-C(20)-F(10)   | 96.6(4)    |
| O(3)-C(21)-N(5)     | 124.18(17) |
| O(3)-C(21)-H(21)    | 117.9      |
| N(5)-C(21)-H(21)    | 117.9      |
| N(5)-C(22)-H(22A)   | 109.5      |
| N(5)-C(22)-H(22B)   | 109.5      |
| H(22A)-C(22)-H(22B) | 109.5      |
| N(5)-C(22)-H(22C)   | 109.5      |
| H(22A)-C(22)-H(22C) | 109.5      |
| H(22B)-C(22)-H(22C) | 109.5      |
| N(5)-C(23)-H(23A)   | 109.5      |
| N(5)-C(23)-H(23B)   | 109.5      |
| H(23A)-C(23)-H(23B) | 109.5      |
| N(5)-C(23)-H(23C)   | 109.5      |
| H(23A)-C(23)-H(23C) | 109.5      |
| H(23B)-C(23)-H(23C) | 109.5      |
| C(24)-N(6)-C(25)    | 120.2(3)   |
| C(24)-N(6)-C(26)    | 122.1(3)   |
| C(25)-N(6)-C(26)    | 117.7(3)   |
| O(13)-C(24)-N(6)    | 126.0(3)   |
| O(13)-C(24)-H(24)   | 117.0      |
| N(6)-C(24)-H(24)    | 117.0      |
| N(6)-C(25)-H(25A)   | 109.5      |
| N(6)-C(25)-H(25B)   | 109.5      |
| H(25A)-C(25)-H(25B) | 109.5      |
| N(6)-C(25)-H(25C)   | 109.5      |
| H(25A)-C(25)-H(25C) | 109.5      |



|                     |       |
|---------------------|-------|
| H(25B)-C(25)-H(25C) | 109.5 |
| N(6)-C(26)-H(26A)   | 109.5 |
| N(6)-C(26)-H(26B)   | 109.5 |
| H(26A)-C(26)-H(26B) | 109.5 |
| N(6)-C(26)-H(26C)   | 109.5 |
| H(26A)-C(26)-H(26C) | 109.5 |
| H(26B)-C(26)-H(26C) | 109.5 |

---

Table 4. Anisotropic displacement parameters ( $\text{\AA}^2 \times 10^3$ ) for rpec17. The anisotropic displacement factor exponent takes the form:  $-2\pi^2 [ h^2 a^{*2} U^{11} + \dots + 2 h k a^* b^* U^{12} ]$

|       | U <sup>11</sup> | U <sup>22</sup> | U <sup>33</sup> | U <sup>23</sup> | U <sup>13</sup> | U <sup>12</sup> |
|-------|-----------------|-----------------|-----------------|-----------------|-----------------|-----------------|
| Yb    | 26(1)           | 25(1)           | 27(1)           | 3(1)            | 18(1)           | 3(1)            |
| P     | 22(1)           | 28(1)           | 25(1)           | 4(1)            | 15(1)           | 5(1)            |
| O(1)  | 30(1)           | 31(1)           | 32(1)           | 7(1)            | 22(1)           | 7(1)            |
| O(2)  | 30(1)           | 37(1)           | 27(1)           | 5(1)            | 17(1)           | 7(1)            |
| O(3)  | 43(1)           | 30(1)           | 46(1)           | 9(1)            | 29(1)           | 8(1)            |
| O(4)  | 58(1)           | 72(1)           | 41(1)           | 11(1)           | 35(1)           | 22(1)           |
| O(5)  | 71(1)           | 40(1)           | 70(1)           | 15(1)           | 58(1)           | 18(1)           |
| O(6)  | 118(2)          | 88(1)           | 104(2)          | 13(1)           | 100(1)          | 30(1)           |
| O(7)  | 49(1)           | 34(1)           | 31(1)           | 7(1)            | 18(1)           | 5(1)            |
| O(8)  | 31(1)           | 32(1)           | 34(1)           | 1(1)            | 7(1)            | 6(1)            |
| O(9)  | 39(1)           | 44(1)           | 47(1)           | -9(1)           | 8(1)            | -8(1)           |
| O(10) | 46(1)           | 51(1)           | 59(1)           | -19(1)          | 38(1)           | -15(1)          |
| O(11) | 50(1)           | 42(1)           | 46(1)           | -5(1)           | 32(1)           | -3(1)           |
| O(12) | 81(1)           | 72(1)           | 93(1)           | -47(1)          | 54(1)           | -43(1)          |
| N(1)  | 24(1)           | 27(1)           | 27(1)           | 3(1)            | 12(1)           | 4(1)            |
| N(2)  | 55(1)           | 43(1)           | 58(1)           | -3(1)           | 46(1)           | 1(1)            |
| N(3)  | 28(1)           | 34(1)           | 29(1)           | 0(1)            | 15(1)           | 3(1)            |
| N(4)  | 46(1)           | 41(1)           | 49(1)           | -12(1)          | 27(1)           | -9(1)           |
| N(5)  | 45(1)           | 30(1)           | 39(1)           | 8(1)            | 24(1)           | 7(1)            |
| C(1)  | 26(1)           | 35(1)           | 41(1)           | 2(1)            | 14(1)           | 1(1)            |
| C(2)  | 36(1)           | 37(1)           | 36(1)           | -6(1)           | 6(1)            | 1(1)            |
| C(3)  | 51(1)           | 44(1)           | 26(1)           | -3(1)           | 14(1)           | 10(1)           |
| C(4)  | 40(1)           | 43(1)           | 29(1)           | 6(1)            | 20(1)           | 12(1)           |
| C(5)  | 26(1)           | 28(1)           | 26(1)           | 5(1)            | 13(1)           | 7(1)            |
| C(6)  | 24(1)           | 28(1)           | 28(1)           | 5(1)            | 14(1)           | 4(1)            |
| C(7)  | 28(1)           | 36(1)           | 27(1)           | 4(1)            | 17(1)           | 9(1)            |
| C(8)  | 43(1)           | 49(1)           | 33(1)           | 9(1)            | 27(1)           | 15(1)           |
| C(9)  | 69(1)           | 70(2)           | 38(1)           | 4(1)            | 39(1)           | 19(1)           |
| C(10) | 75(2)           | 59(1)           | 41(1)           | -10(1)          | 32(1)           | 14(1)           |
| C(11) | 61(1)           | 45(1)           | 49(1)           | -10(1)          | 29(1)           | 1(1)            |
| C(12) | 42(1)           | 38(1)           | 40(1)           | -2(1)           | 25(1)           | 3(1)            |

|       |         |         |         |         |         |          |
|-------|---------|---------|---------|---------|---------|----------|
| C(13) | 76(2)   | 62(1)   | 69(2)   | 14(1)   | 61(1)   | 11(1)    |
| F(1)  | 117(3)  | 87(2)   | 70(2)   | 20(2)   | 78(2)   | 8(2)     |
| F(2)  | 86(2)   | 48(1)   | 115(3)  | 12(2)   | 85(2)   | 8(1)     |
| F(3)  | 52(1)   | 87(2)   | 72(1)   | 6(1)    | 37(1)   | -12(1)   |
| F(4)  | 100(8)  | 97(8)   | 279(17) | 115(11) | 115(10) | 40(6)    |
| F(5)  | 360(30) | 110(12) | 108(11) | -59(9)  | 175(17) | -148(15) |
| F(6)  | 65(6)   | 116(12) | 121(13) | 5(9)    | 85(8)   | -5(6)    |
| C(14) | 24(1)   | 38(1)   | 28(1)   | 2(1)    | 15(1)   | 3(1)     |
| C(15) | 26(1)   | 50(1)   | 34(1)   | 10(1)   | 15(1)   | 5(1)     |
| C(16) | 27(1)   | 71(2)   | 44(1)   | 7(1)    | 11(1)   | 1(1)     |
| C(17) | 34(1)   | 72(2)   | 50(1)   | -15(1)  | 14(1)   | -13(1)   |
| C(18) | 39(1)   | 49(1)   | 63(1)   | -17(1)  | 24(1)   | -7(1)    |
| C(19) | 28(1)   | 41(1)   | 47(1)   | -6(1)   | 18(1)   | 3(1)     |
| C(20) | 31(1)   | 56(1)   | 71(2)   | 24(1)   | 19(1)   | 14(1)    |
| F(7)  | 89(2)   | 63(1)   | 104(2)  | 8(1)    | 76(2)   | 22(1)    |
| F(8)  | 46(2)   | 49(2)   | 93(3)   | 19(2)   | 43(2)   | 11(1)    |
| F(9)  | 52(2)   | 77(2)   | 66(2)   | 28(1)   | -1(1)   | 28(1)    |
| F(10) | 256(13) | 60(4)   | 55(4)   | 15(3)   | 72(6)   | -20(6)   |
| F(11) | 77(7)   | 65(5)   | 340(20) | 28(11)  | 140(12) | 35(5)    |
| F(12) | 63(8)   | 37(5)   | 46(4)   | -9(3)   | -5(4)   | 25(5)    |
| C(21) | 46(1)   | 30(1)   | 47(1)   | 11(1)   | 31(1)   | 8(1)     |
| C(22) | 71(2)   | 45(1)   | 77(2)   | 27(1)   | 47(1)   | 8(1)     |
| C(23) | 51(1)   | 53(1)   | 74(2)   | 21(1)   | 30(1)   | 19(1)    |
| O(13) | 106(2)  | 136(2)  | 56(1)   | -23(1)  | 28(1)   | -28(2)   |
| N(6)  | 60(1)   | 86(2)   | 67(1)   | -10(1)  | 21(1)   | -4(1)    |
| C(24) | 64(2)   | 110(3)  | 65(2)   | -4(2)   | 26(2)   | -15(2)   |
| C(25) | 78(2)   | 115(3)  | 127(3)  | 15(3)   | 52(2)   | 19(2)    |
| C(26) | 119(4)  | 192(6)  | 118(4)  | -87(4)  | 37(3)   | -31(4)   |
| O(14) | 100(50) | 48(6)   | 100(40) | 0       | 70(40)  | 0        |
| O(15) | 74(13)  | 110(11) | 90(17)  | 34(13)  | 54(13)  | 36(12)   |

---

Table 5. Hydrogen coordinates ( $\times 10^4$ ) and isotropic displacement parameters ( $\text{\AA}^2 \times 10^3$ ) for rpec17.

|        | x        | y        | z        | U(eq)   |
|--------|----------|----------|----------|---------|
| H(1)   | 8833     | 9543     | 11439    | 44      |
| H(2)   | 9099     | 9731     | 12660    | 53      |
| H(3)   | 8468     | 9388     | 12958    | 54      |
| H(4)   | 7588     | 8822     | 12031    | 45      |
| H(6A)  | 7009     | 7985     | 10802    | 32      |
| H(6B)  | 7206     | 7996     | 10256    | 32      |
| H(9)   | 6276     | 10597    | 11839    | 65      |
| H(10)  | 6662     | 12104    | 11924    | 71      |
| H(11)  | 7023     | 12433    | 11232    | 63      |
| H(12)  | 6990     | 11234    | 10447    | 47      |
| H(16)  | 4674     | 8949     | 8065     | 63      |
| H(17)  | 4733     | 7263     | 8026     | 68      |
| H(18)  | 5571     | 6480     | 8828     | 64      |
| H(19)  | 6359     | 7392     | 9646     | 49      |
| H(21)  | 6339     | 11181    | 8536     | 45      |
| H(22A) | 6821     | 13445    | 8193     | 92      |
| H(22B) | 6387     | 13236    | 7329     | 92      |
| H(22C) | 6910     | 12541    | 7811     | 92      |
| H(23A) | 5596     | 12141    | 7865     | 93      |
| H(23B) | 5538     | 12628    | 7160     | 93      |
| H(23C) | 5760     | 13258    | 7892     | 93      |
| H(24)  | 4394     | 3889     | 5642     | 103     |
| H(25A) | 5660     | 4188     | 5988     | 164     |
| H(25B) | 5414     | 4203     | 5123     | 164     |
| H(25C) | 5618     | 3200     | 5572     | 164     |
| H(26A) | 4689     | 2455     | 4715     | 239     |
| H(26B) | 4420     | 3431     | 4245     | 239     |
| H(26C) | 4180     | 2948     | 4670     | 239     |
| H(1W)  | 4970(20) | 4890(30) | 7110(30) | 105(18) |

Table 6. Torsion angles [°] for rpec17.

---

|                     |             |
|---------------------|-------------|
| C(6)-P-O(1)-Yb      | 18.78(14)   |
| C(14)-P-O(1)-Yb     | -98.92(12)  |
| C(7)-P-O(1)-Yb      | 135.79(11)  |
| O(3)-Yb-O(1)-P      | 173.06(12)  |
| O(2)-Yb-O(1)-P      | -30.78(12)  |
| O(10)-Yb-O(1)-P     | -115.74(12) |
| O(5)-Yb-O(1)-P      | 10.13(18)   |
| O(8)-Yb-O(1)-P      | 45.32(12)   |
| O(4)-Yb-O(1)-P      | 118.25(12)  |
| O(11)-Yb-O(1)-P     | -109.09(12) |
| O(7)-Yb-O(1)-P      | 98.41(12)   |
| O(1)-Yb-O(2)-N(1)   | -46.24(12)  |
| O(3)-Yb-O(2)-N(1)   | 14.92(18)   |
| O(10)-Yb-O(2)-N(1)  | 83.04(12)   |
| O(5)-Yb-O(2)-N(1)   | 155.99(13)  |
| O(8)-Yb-O(2)-N(1)   | -126.81(13) |
| O(4)-Yb-O(2)-N(1)   | 153.72(11)  |
| O(11)-Yb-O(2)-N(1)  | 31.52(12)   |
| O(7)-Yb-O(2)-N(1)   | -112.66(12) |
| O(1)-Yb-O(3)-C(21)  | -30.99(15)  |
| O(2)-Yb-O(3)-C(21)  | -91.97(18)  |
| O(10)-Yb-O(3)-C(21) | -162.58(16) |
| O(5)-Yb-O(3)-C(21)  | 137.23(15)  |
| O(8)-Yb-O(3)-C(21)  | 40.93(17)   |
| O(4)-Yb-O(3)-C(21)  | 121.79(16)  |
| O(11)-Yb-O(3)-C(21) | -108.59(16) |
| O(7)-Yb-O(3)-C(21)  | 45.52(15)   |
| O(1)-Yb-O(4)-N(2)   | -139.01(10) |
| O(3)-Yb-O(4)-N(2)   | 164.58(13)  |
| O(2)-Yb-O(4)-N(2)   | 2.63(14)    |
| O(10)-Yb-O(4)-N(2)  | 81.86(12)   |
| O(5)-Yb-O(4)-N(2)   | -0.08(11)   |
| O(8)-Yb-O(4)-N(2)   | -69.18(12)  |
| O(11)-Yb-O(4)-N(2)  | 100.25(12)  |

|                     |             |
|---------------------|-------------|
| O(7)-Yb-O(4)-N(2)   | -118.99(12) |
| O(1)-Yb-O(5)-N(2)   | 139.33(11)  |
| O(3)-Yb-O(5)-N(2)   | -18.98(14)  |
| O(2)-Yb-O(5)-N(2)   | -177.57(13) |
| O(10)-Yb-O(5)-N(2)  | -81.59(12)  |
| O(8)-Yb-O(5)-N(2)   | 103.18(12)  |
| O(4)-Yb-O(5)-N(2)   | 0.08(11)    |
| O(11)-Yb-O(5)-N(2)  | -113.09(12) |
| O(7)-Yb-O(5)-N(2)   | 58.93(12)   |
| O(1)-Yb-O(7)-N(3)   | -89.31(9)   |
| O(3)-Yb-O(7)-N(3)   | -176.98(10) |
| O(2)-Yb-O(7)-N(3)   | -19.25(11)  |
| O(10)-Yb-O(7)-N(3)  | 135.05(9)   |
| O(5)-Yb-O(7)-N(3)   | 56.63(10)   |
| O(8)-Yb-O(7)-N(3)   | -1.75(9)    |
| O(4)-Yb-O(7)-N(3)   | 101.82(10)  |
| O(11)-Yb-O(7)-N(3)  | -134.67(9)  |
| O(1)-Yb-O(8)-N(3)   | 81.56(10)   |
| O(3)-Yb-O(8)-N(3)   | 7.36(12)    |
| O(2)-Yb-O(8)-N(3)   | 167.00(10)  |
| O(10)-Yb-O(8)-N(3)  | -126.20(10) |
| O(5)-Yb-O(8)-N(3)   | -117.71(10) |
| O(4)-Yb-O(8)-N(3)   | -66.99(10)  |
| O(11)-Yb-O(8)-N(3)  | 128.37(10)  |
| O(7)-Yb-O(8)-N(3)   | 1.75(9)     |
| O(1)-Yb-O(10)-N(4)  | 5.33(14)    |
| O(3)-Yb-O(10)-N(4)  | 78.40(12)   |
| O(2)-Yb-O(10)-N(4)  | -75.96(12)  |
| O(5)-Yb-O(10)-N(4)  | -147.08(13) |
| O(8)-Yb-O(10)-N(4)  | -138.61(11) |
| O(4)-Yb-O(10)-N(4)  | 157.97(13)  |
| O(11)-Yb-O(10)-N(4) | -2.79(11)   |
| O(7)-Yb-O(10)-N(4)  | 124.82(12)  |
| O(1)-Yb-O(11)-N(4)  | -170.73(12) |
| O(3)-Yb-O(11)-N(4)  | -84.13(11)  |
| O(2)-Yb-O(11)-N(4)  | 103.61(11)  |

|                     |             |
|---------------------|-------------|
| O(10)-Yb-O(11)-N(4) | 2.79(11)    |
| O(5)-Yb-O(11)-N(4)  | 41.85(12)   |
| O(8)-Yb-O(11)-N(4)  | 141.87(11)  |
| O(4)-Yb-O(11)-N(4)  | -19.58(13)  |
| O(7)-Yb-O(11)-N(4)  | -125.69(11) |
| Yb-O(2)-N(1)-C(1)   | -101.26(14) |
| Yb-O(2)-N(1)-C(5)   | 82.15(16)   |
| Yb-O(4)-N(2)-O(6)   | -179.38(19) |
| Yb-O(4)-N(2)-O(5)   | 0.14(18)    |
| Yb-O(5)-N(2)-O(6)   | 179.38(19)  |
| Yb-O(5)-N(2)-O(4)   | -0.14(18)   |
| Yb-O(7)-N(3)-O(9)   | -176.33(15) |
| Yb-O(7)-N(3)-O(8)   | 2.90(14)    |
| Yb-O(8)-N(3)-O(9)   | 176.21(14)  |
| Yb-O(8)-N(3)-O(7)   | -3.02(15)   |
| Yb-O(11)-N(4)-O(12) | 174.7(2)    |
| Yb-O(11)-N(4)-O(10) | -4.65(18)   |
| Yb-O(10)-N(4)-O(12) | -174.59(19) |
| Yb-O(10)-N(4)-O(11) | 4.78(18)    |
| O(2)-N(1)-C(1)-C(2) | -177.51(15) |
| C(5)-N(1)-C(1)-C(2) | -1.0(2)     |
| N(1)-C(1)-C(2)-C(3) | -0.8(3)     |
| C(1)-C(2)-C(3)-C(4) | 1.0(3)      |
| C(2)-C(3)-C(4)-C(5) | 0.5(3)      |
| O(2)-N(1)-C(5)-C(4) | 178.94(13)  |
| C(1)-N(1)-C(5)-C(4) | 2.5(2)      |
| O(2)-N(1)-C(5)-C(6) | 0.42(19)    |
| C(1)-N(1)-C(5)-C(6) | -176.07(14) |
| C(3)-C(4)-C(5)-N(1) | -2.2(2)     |
| C(3)-C(4)-C(5)-C(6) | 176.23(16)  |
| N(1)-C(5)-C(6)-P    | -86.52(14)  |
| C(4)-C(5)-C(6)-P    | 95.03(16)   |
| O(1)-P-C(6)-C(5)    | 63.54(12)   |
| C(14)-P-C(6)-C(5)   | -175.10(11) |
| C(7)-P-C(6)-C(5)    | -53.27(13)  |
| O(1)-P-C(7)-C(12)   | -8.45(14)   |

|                         |             |
|-------------------------|-------------|
| C(6)-P-C(7)-C(12)       | 109.03(13)  |
| C(14)-P-C(7)-C(12)      | -133.30(13) |
| O(1)-P-C(7)-C(8)        | 173.23(15)  |
| C(6)-P-C(7)-C(8)        | -69.29(17)  |
| C(14)-P-C(7)-C(8)       | 48.38(18)   |
| C(12)-C(7)-C(8)-C(9)    | 0.2(3)      |
| P-C(7)-C(8)-C(9)        | 178.41(15)  |
| C(12)-C(7)-C(8)-C(13)   | 178.14(19)  |
| P-C(7)-C(8)-C(13)       | -3.6(3)     |
| C(7)-C(8)-C(9)-C(10)    | 0.0(3)      |
| C(13)-C(8)-C(9)-C(10)   | -178.1(2)   |
| C(8)-C(9)-C(10)-C(11)   | -0.1(4)     |
| C(9)-C(10)-C(11)-C(12)  | 0.1(4)      |
| C(8)-C(7)-C(12)-C(11)   | -0.2(3)     |
| P-C(7)-C(12)-C(11)      | -178.69(16) |
| C(10)-C(11)-C(12)-C(7)  | 0.0(3)      |
| C(9)-C(8)-C(13)-F(5)    | 160.6(18)   |
| C(7)-C(8)-C(13)-F(5)    | -17.4(18)   |
| C(9)-C(8)-C(13)-F(6)    | -1.6(11)    |
| C(7)-C(8)-C(13)-F(6)    | -179.6(11)  |
| C(9)-C(8)-C(13)-F(2)    | -142.0(3)   |
| C(7)-C(8)-C(13)-F(2)    | 40.0(4)     |
| C(9)-C(8)-C(13)-F(1)    | -15.4(4)    |
| C(7)-C(8)-C(13)-F(1)    | 166.6(3)    |
| C(9)-C(8)-C(13)-F(3)    | 102.5(2)    |
| C(7)-C(8)-C(13)-F(3)    | -75.5(3)    |
| C(9)-C(8)-C(13)-F(4)    | -97.8(8)    |
| C(7)-C(8)-C(13)-F(4)    | 84.2(8)     |
| O(1)-P-C(14)-C(19)      | 109.91(14)  |
| C(6)-P-C(14)-C(19)      | -9.16(15)   |
| C(7)-P-C(14)-C(19)      | -127.76(14) |
| O(1)-P-C(14)-C(15)      | -67.45(16)  |
| C(6)-P-C(14)-C(15)      | 173.48(14)  |
| C(7)-P-C(14)-C(15)      | 54.88(16)   |
| C(19)-C(14)-C(15)-C(16) | 0.5(3)      |
| P-C(14)-C(15)-C(16)     | 177.83(15)  |



|                         |             |
|-------------------------|-------------|
| C(19)-C(14)-C(15)-C(20) | 177.65(19)  |
| P-C(14)-C(15)-C(20)     | -5.0(3)     |
| C(14)-C(15)-C(16)-C(17) | -0.2(3)     |
| C(20)-C(15)-C(16)-C(17) | -177.6(2)   |
| C(15)-C(16)-C(17)-C(18) | 0.4(4)      |
| C(16)-C(17)-C(18)-C(19) | -0.9(4)     |
| C(17)-C(18)-C(19)-C(14) | 1.2(3)      |
| C(15)-C(14)-C(19)-C(18) | -1.0(3)     |
| P-C(14)-C(19)-C(18)     | -178.54(17) |
| C(16)-C(15)-C(20)-F(11) | 29.9(13)    |
| C(14)-C(15)-C(20)-F(11) | -147.4(13)  |
| C(16)-C(15)-C(20)-F(12) | -167.7(9)   |
| C(14)-C(15)-C(20)-F(12) | 15.0(10)    |
| C(16)-C(15)-C(20)-F(9)  | -21.9(4)    |
| C(14)-C(15)-C(20)-F(9)  | 160.8(3)    |
| C(16)-C(15)-C(20)-F(8)  | -151.5(3)   |
| C(14)-C(15)-C(20)-F(8)  | 31.3(4)     |
| C(16)-C(15)-C(20)-F(7)  | 94.8(3)     |
| C(14)-C(15)-C(20)-F(7)  | -82.5(3)    |
| C(16)-C(15)-C(20)-F(10) | -72.3(6)    |
| C(14)-C(15)-C(20)-F(10) | 110.4(6)    |
| Yb-O(3)-C(21)-N(5)      | -168.37(14) |
| C(22)-N(5)-C(21)-O(3)   | -1.9(3)     |
| C(23)-N(5)-C(21)-O(3)   | -177.1(2)   |
| C(25)-N(6)-C(24)-O(13)  | -0.5(6)     |
| C(26)-N(6)-C(24)-O(13)  | 178.6(4)    |

---

Table 7. Hydrogen bonds for rpec17 [ $\text{\AA}$  and  $^\circ$ ].

| D-H...A               | d(D-H) | d(H...A) | d(D...A)   | $\angle(\text{DHA})$ |
|-----------------------|--------|----------|------------|----------------------|
| C(2)-H(2)...O(13)#2   | 0.94   | 2.42     | 3.354(3)   | 170.4                |
| C(6)-H(6A)...F(2)     | 0.98   | 2.24     | 2.975(3)   | 131.2                |
| C(6)-H(6A)...O(5)#2   | 0.98   | 2.53     | 3.259(2)   | 131.0                |
| C(6)-H(6B)...O(8)#2   | 0.98   | 2.58     | 3.0293(18) | 108.1                |
| C(9)-H(9)...F(1)      | 0.94   | 2.34     | 2.689(8)   | 101.7                |
| C(9)-H(9)...O(7)#3    | 0.94   | 2.49     | 3.289(2)   | 142.4                |
| C(12)-H(12)...O(1)    | 0.94   | 2.34     | 2.839(2)   | 112.6                |
| C(16)-H(16)...F(9)    | 0.94   | 2.37     | 2.710(4)   | 100.8                |
| C(17)-H(17)...O(9)#1  | 0.94   | 2.55     | 3.204(2)   | 126.9                |
| C(21)-H(21)...F(8)    | 0.94   | 2.42     | 3.304(5)   | 156.7                |
| C(21)-H(21)...O(1)    | 0.94   | 2.59     | 3.145(2)   | 117.8                |
| C(22)-H(22B)...O(6)#4 | 0.97   | 2.50     | 3.042(3)   | 114.9                |
| C(25)-H(25A)...O(13)  | 0.97   | 2.34     | 2.751(5)   | 104.9                |

Symmetry transformations used to generate equivalent atoms:

#1  $-x+1, y, -z+3/2$  #2  $-x+3/2, -y+3/2, -z+2$  #3  $x, -y+2, z+1/2$

#4  $-x+3/2, y+1/2, -z+3/2$

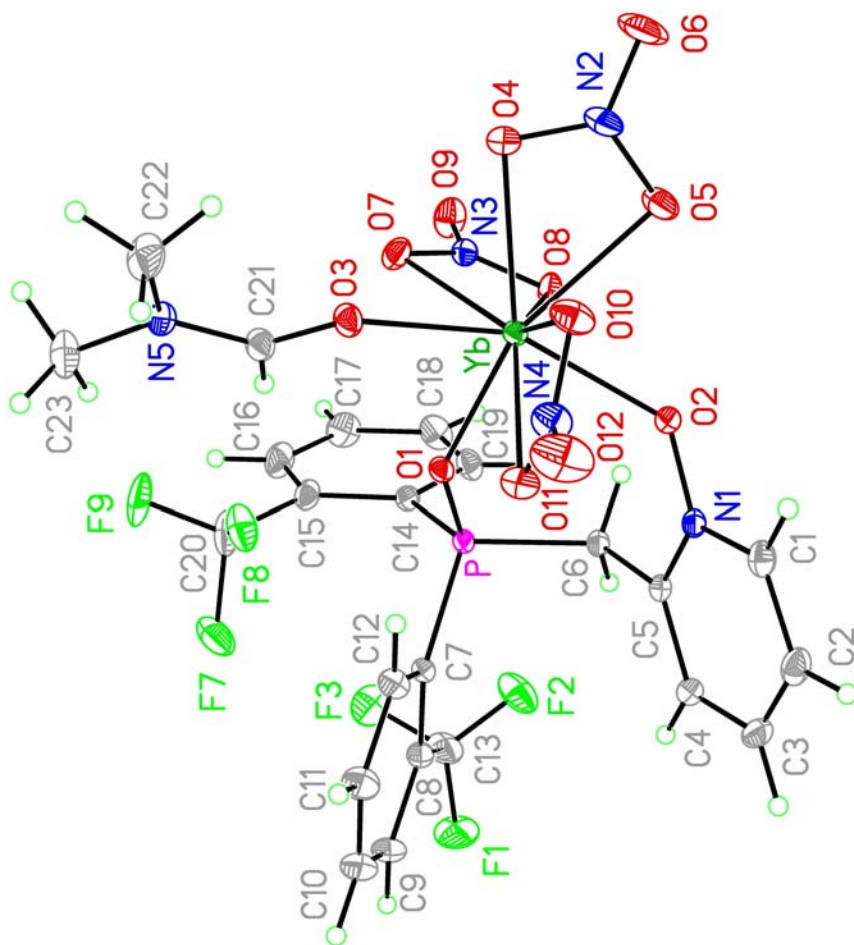

Figure 1. rpec1711.jpg single molecule with 20% displacement ellipsoids, also see rpec1711b.jpg b/w, note that only major disorder parts shown [F1,F2,F3 and F7,F8,F9]

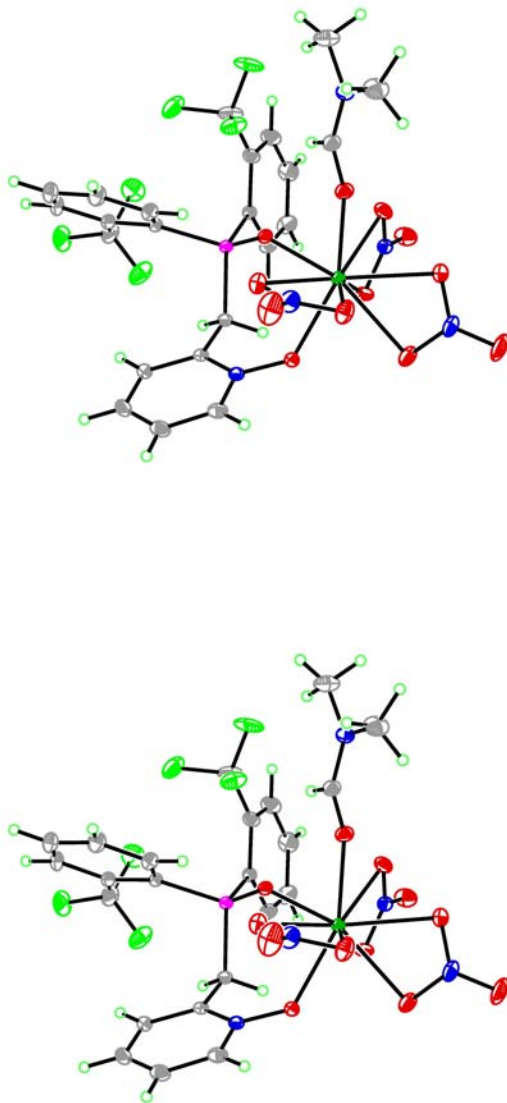

Figure 2. rpec17s1.jpg stereoview of molecule at 20% displacement ellipsoids, also rpec17s1b.jpg, note that only major disorder parts shown [F1,F2,F3 and F7,F8,F9]

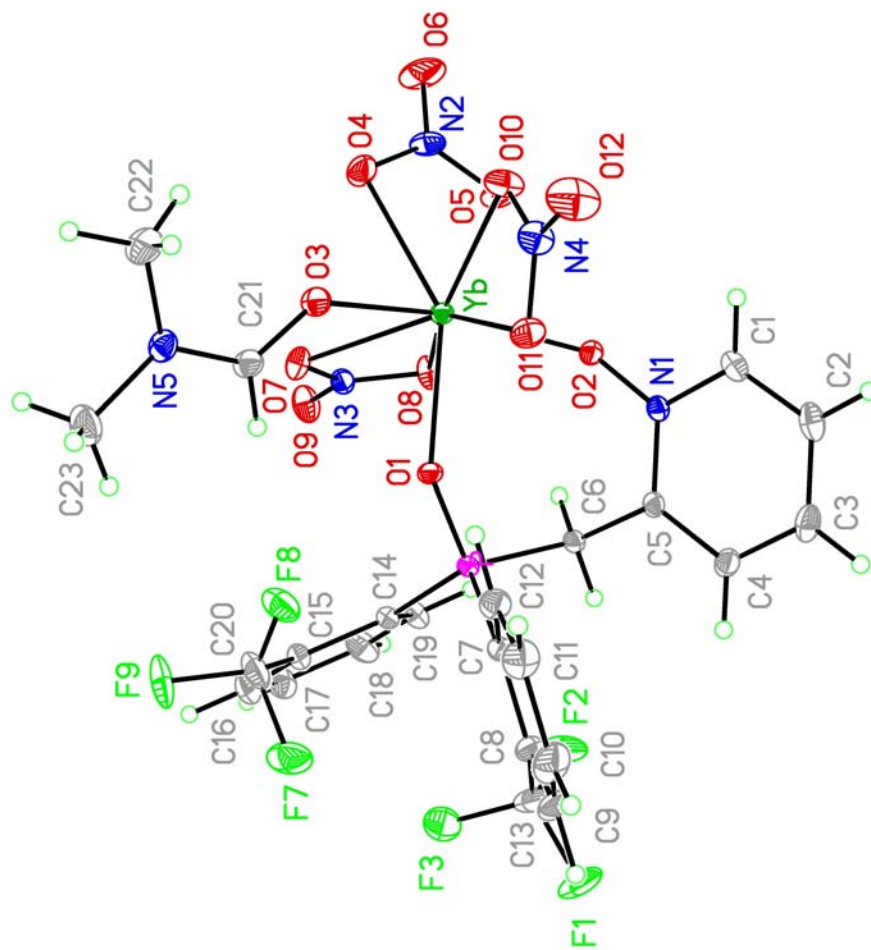

Figure 3. rpec17l2.jpg, another view of molecule 20% displacement ellipsoids, also rpec17l2b.jpg b/w and rpec17s2.jpg, rpec17s2b.jpg stereo views

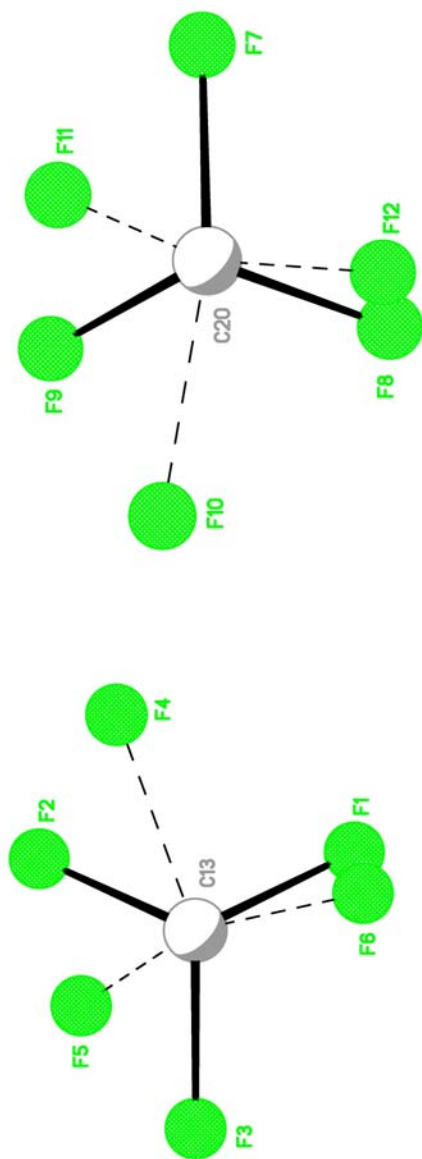

rpec17 disorder of CF3 units.  
C13 F1/F2/F3 77% occupancy and F4/F5/F6 23% occupancy. Total=100%  
C20 F7/F8/F9 75% occupancy and F10/F11/F12 25% occupancy. Total=100%

Figure 4. rpec17cf.jpg disorder of CF3 units, also rpec17c13.jpg and rpec17c20.jpg, note that only major disorder parts shown [F1,F2,F3 and F7,F8,F9]

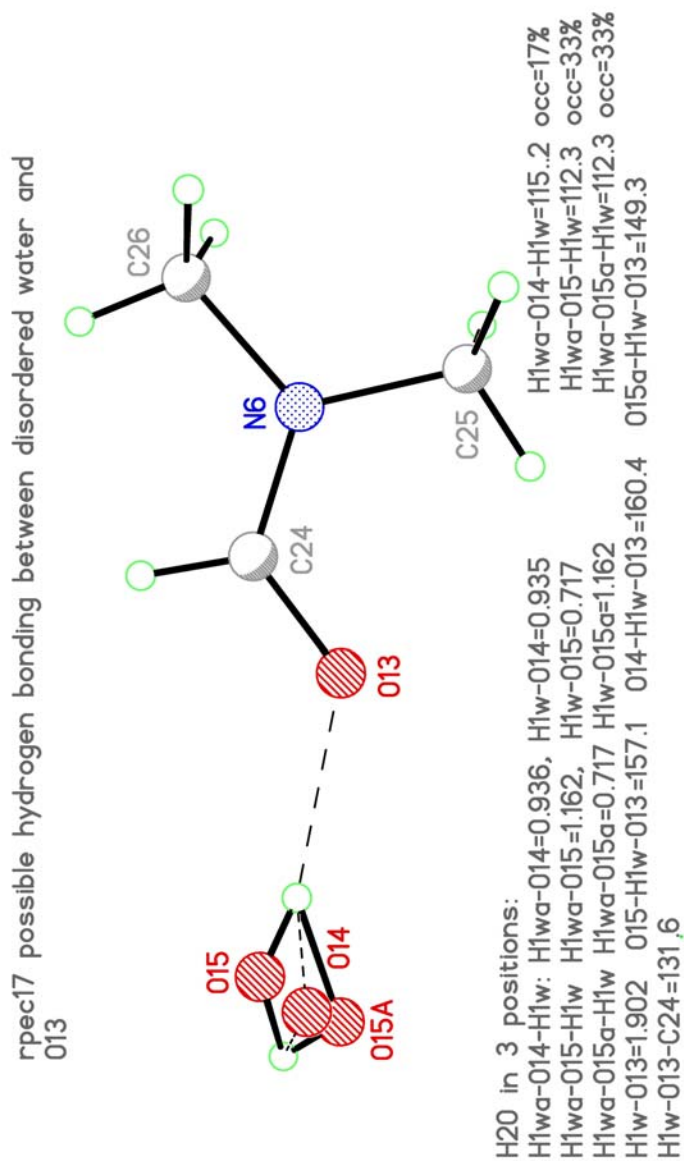

Figure 5. rpec17w1q.jpg disorder of water molecule over 3 positions..H14a-O14-H14,H15a-O15-H15,H15a-O15a-H15, also rpec17w1b.jpg b/w, rpec17w1.jpg [no notation],rpec17w1b.jpg b/w

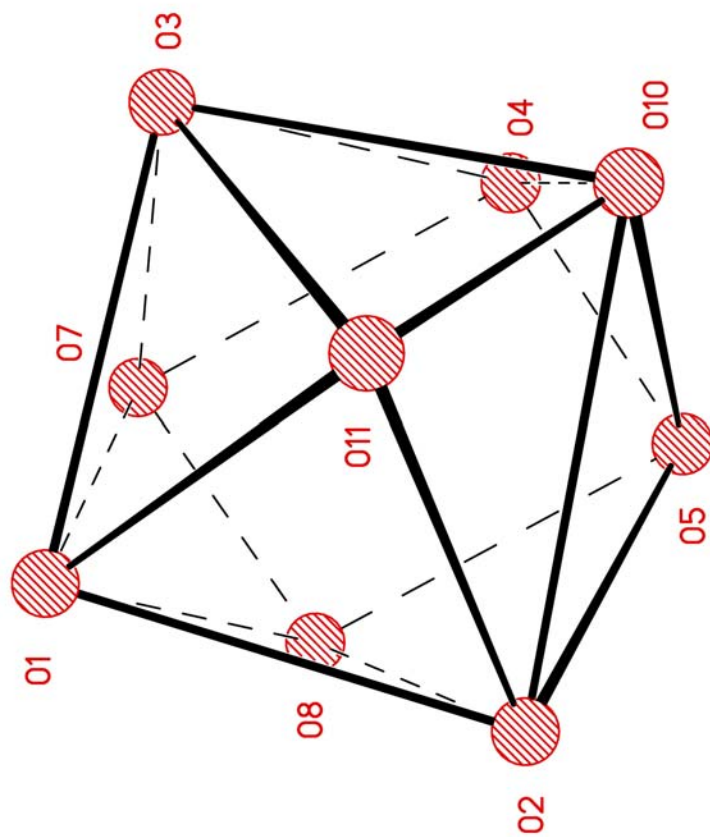

rpec17 Coordination polyhedron about Yb is distorted monocapped square antiprism.

Figure 6. rpec17ybp.jpg coordination polyhedron of Yb, also rpec17yb.jpg no notation, rpec17ybb.jpg b/w



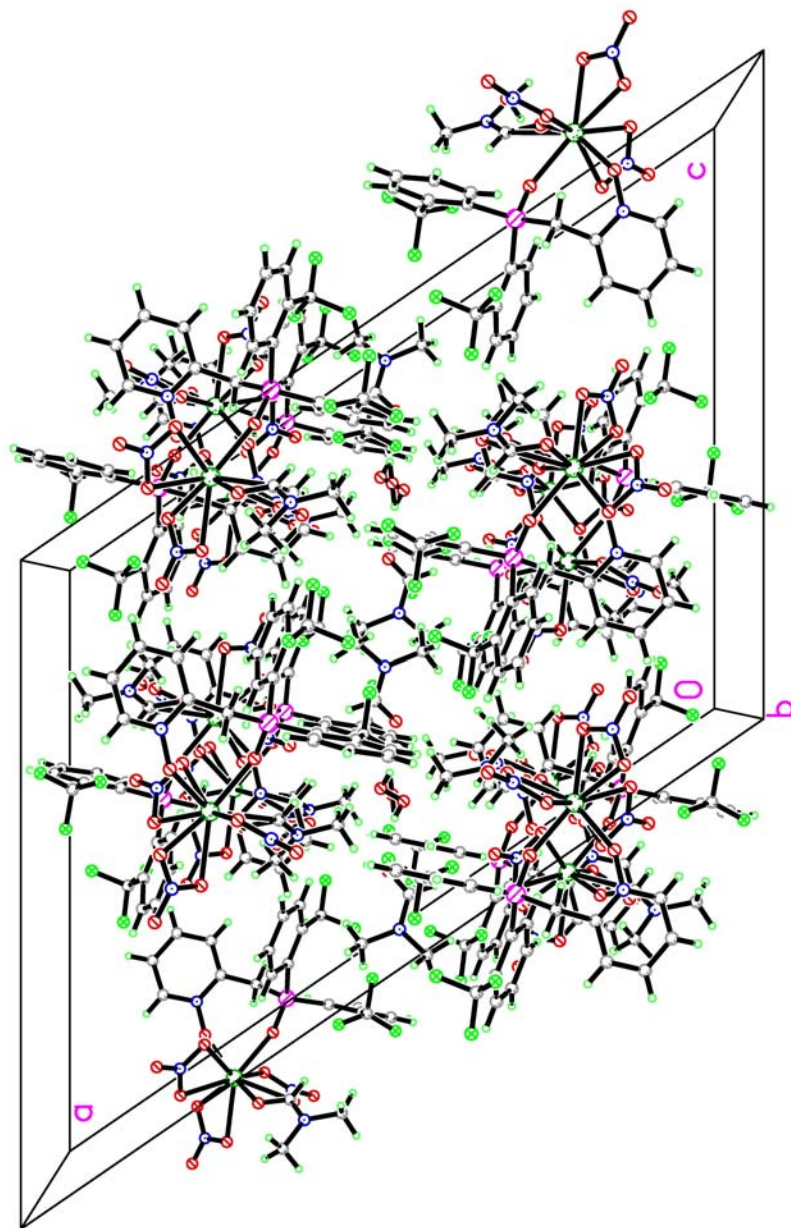

Figure 7. rpec17bl.jpg packing of cell, view down b-axis; also rpec16blb.jpg b/w, note that only major disorder parts shown [F1,F2,F3 and F7,F8,F9]

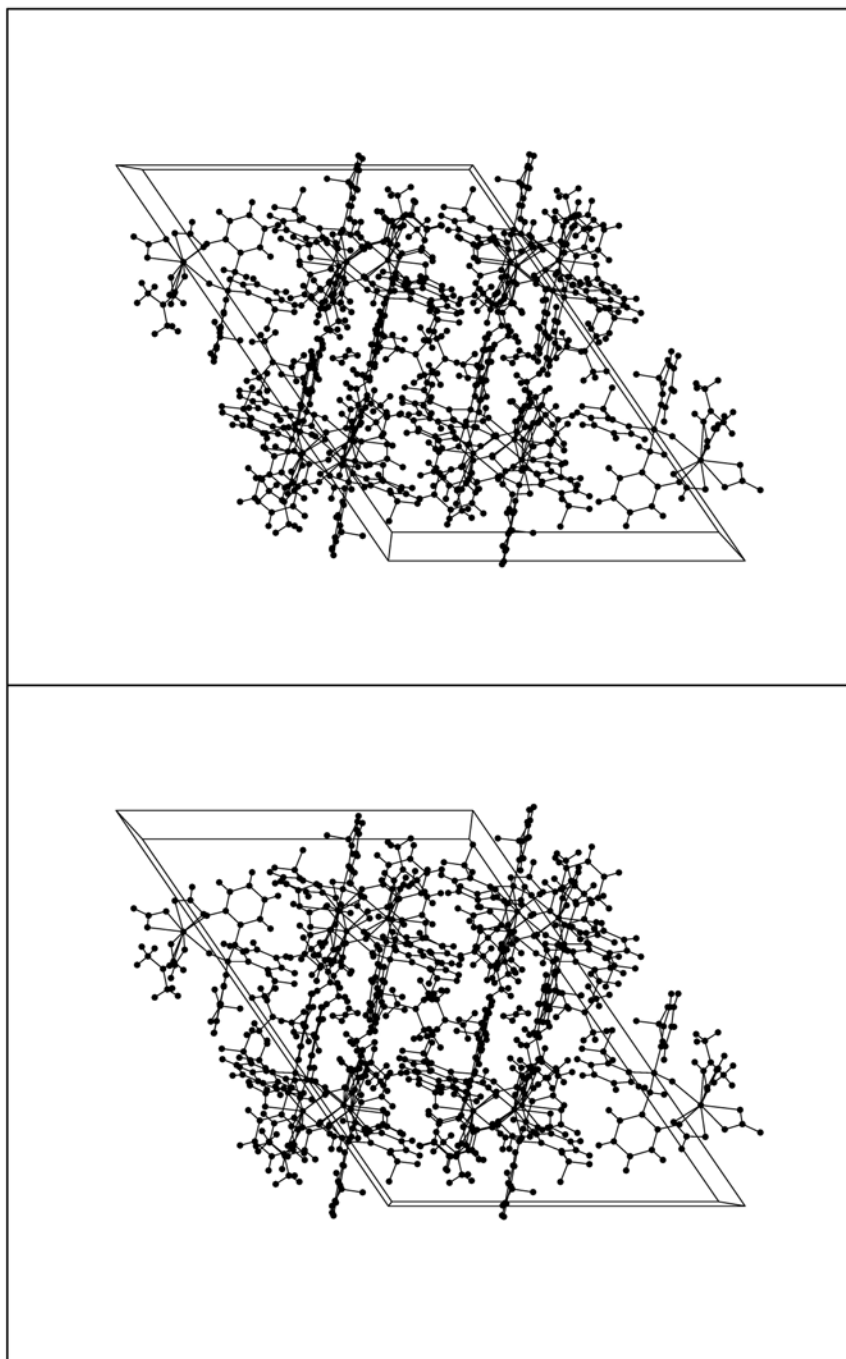

Figure 8. rpec17bsb.jpg stereoview of packing, view down b-axis, note that only major disorder parts shown [F1,F2,F3 and F7,F8,F9]

Computational material for **3c**, **1c**, **3d**, **1d**.

**{[2-(CF<sub>3</sub>)C<sub>6</sub>H<sub>4</sub>]<sub>2</sub>P(O)CH<sub>2</sub>]}C<sub>5</sub>H<sub>4</sub>N, **3c****

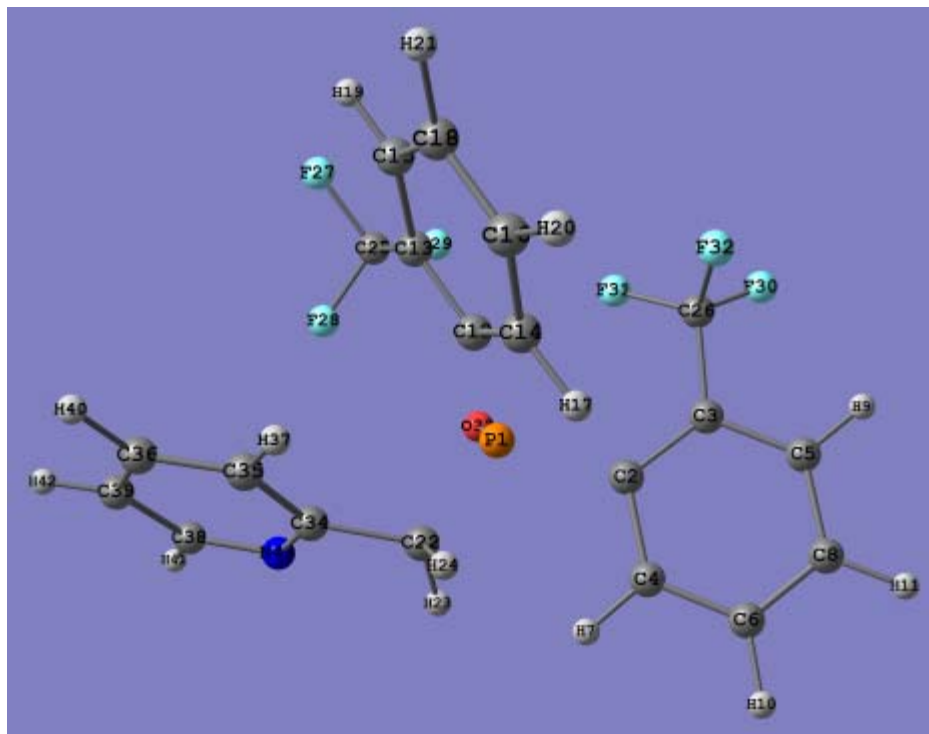

Atom Coordinates  
(Angstroms)

|    |   |             |             |             |
|----|---|-------------|-------------|-------------|
| 1  | P | -0.18044000 | 0.82910100  | -0.41780000 |
| 2  | C | -1.94962700 | 1.28909400  | -0.02135400 |
| 3  | C | -3.07373700 | 0.45044600  | -0.20030600 |
| 4  | C | -2.19578000 | 2.62519000  | 0.32556200  |
| 5  | C | -4.36263600 | 0.95099800  | -0.00743000 |
| 6  | C | -3.48390700 | 3.11851100  | 0.51330100  |
| 7  | H | -1.37061100 | 3.31169600  | 0.44865300  |
| 8  | C | -4.57498000 | 2.27757300  | 0.34826100  |
| 9  | H | -5.20749600 | 0.29059700  | -0.15060300 |
| 10 | H | -3.62530400 | 4.15924700  | 0.78082700  |
| 11 | H | -5.58447700 | 2.64584200  | 0.48655700  |
| 12 | C | 0.17310400  | -0.64292800 | 0.66100800  |
| 13 | C | 0.96822600  | -1.75632100 | 0.31997300  |
| 14 | C | -0.37107000 | -0.58944200 | 1.94958600  |
| 15 | C | 1.17263400  | -2.77004900 | 1.25797400  |
| 16 | C | -0.15658100 | -1.59965800 | 2.88141100  |
| 17 | H | -0.99587400 | 0.25102500  | 2.22978400  |
| 18 | C | 0.61609100  | -2.69838700 | 2.53071100  |

Atom Coordinates

(continued)

|    |   |              |              |              |
|----|---|--------------|--------------|--------------|
| 19 | H | 1.779087000  | -3.621837000 | 0.984833000  |
| 20 | H | -0.601352000 | -1.529232000 | 3.867183000  |
| 21 | H | 0.788204000  | -3.500354000 | 3.238872000  |
| 22 | C | 0.834173000  | 2.156497000  | 0.409191000  |
| 23 | H | 0.619787000  | 3.081877000  | -0.127037000 |
| 24 | H | 0.516366000  | 2.252770000  | 1.450024000  |
| 25 | C | 1.634813000  | -1.924821000 | -1.036596000 |
| 26 | C | -2.996762000 | -1.026994000 | -0.527586000 |
| 27 | F | 2.455814000  | -3.008537000 | -1.041481000 |
| 28 | F | 2.406759000  | -0.870048000 | -1.353226000 |
| 39 | F | 0.749444000  | -2.117295000 | -2.022876000 |
| 30 | F | -4.088392000 | -1.437865000 | -1.210116000 |
| 31 | F | -1.927075000 | -1.362364000 | -1.260032000 |
| 32 | F | -2.957052000 | -1.772830000 | 0.607295000  |
| 33 | O | 0.063863000  | 0.711903000  | -1.880418000 |
| 34 | C | 2.322880000  | 1.921139000  | 0.313834000  |
| 35 | C | 3.008276000  | 1.146091000  | 1.255494000  |
| 36 | C | 4.378653000  | 0.967808000  | 1.107762000  |
| 37 | H | 2.477080000  | 0.693348000  | 2.083869000  |
| 38 | C | 4.255334000  | 2.327501000  | -0.849907000 |
| 39 | C | 5.020786000  | 1.564924000  | 0.028068000  |
| 40 | H | 4.934497000  | 0.372102000  | 1.823122000  |
| 41 | H | 4.718044000  | 2.819787000  | -1.700670000 |
| 42 | H | 6.086232000  | 1.449685000  | -0.130249000 |
| 43 | N | 2.940958000  | 2.512732000  | -0.714947000 |

### Bond Angles and Lengths

|          |       |
|----------|-------|
| R(1-33)  | 1.488 |
| R(2-3)   | 1.414 |
| R(2-4)   | 1.402 |
| R(3-5)   | 1.396 |
| R(3-26)  | 1.515 |
| R(4-6)   | 1.392 |
| R(4-7)   | 1.080 |
| R(5-8)   | 1.390 |
| R(5-9)   | 1.082 |
| R(6-8)   | 1.387 |
| R(6-10)  | 1.084 |
| R(8-11)  | 1.083 |
| R(12-13) | 1.410 |
| R(12-14) | 1.400 |
| R(13-15) | 1.396 |
| R(13-25) | 1.521 |
| R(14-16) | 1.391 |
| R(14-17) | 1.084 |
| R(15-18) | 1.391 |
| R(15-19) | 1.081 |
| R(16-18) | 1.388 |
| R(16-20) | 1.084 |
| R(18-21) | 1.084 |
| R(22-23) | 1.091 |
| R(22-24) | 1.093 |
| R(22-34) | 1.510 |
| R(25-27) | 1.360 |
| R(25-28) | 1.345 |
| R(25-29) | 1.339 |
| R(26-30) | 1.351 |
| R(26-31) | 1.339 |
| R(26-32) | 1.359 |
| R(34-35) | 1.399 |
| R(34-43) | 1.338 |
| R(35-36) | 1.390 |
| R(35-37) | 1.083 |
| R(36-39) | 1.391 |
| R(36-40) | 1.084 |
| R(38-39) | 1.392 |
| R(38-41) | 1.086 |
| R(38-43) | 1.334 |
| R(39-42) | 1.083 |

### Bond Angles

|             |       |
|-------------|-------|
| A(3-2-4)    | 117.2 |
| A(2-3-5)    | 120.3 |
| A(2-3-26)   | 124.4 |
| A(2-4-6)    | 122.2 |
| A(2-4-7)    | 120.0 |
| A(5-3-26)   | 115.2 |
| A(3-5-8)    | 121.2 |
| A(3-5-9)    | 118.9 |
| A(3-26-30)  | 111.4 |
| A(3-26-31)  | 113.8 |
| A(3-26-32)  | 110.9 |
| A(6-4-7)    | 117.8 |
| A(4-6-8)    | 119.8 |
| A(4-6-10)   | 119.6 |
| A(8-5-9)    | 119.8 |
| A(5-8-6)    | 119.3 |
| A(5-8-11)   | 120.0 |
| A(8-6-10)   | 120.6 |
| A(6-8-11)   | 120.8 |
| A(13-12-14) | 118.2 |
| A(12-13-15) | 119.6 |
| A(12-13-25) | 123.4 |
| A(12-14-16) | 121.9 |
| A(12-14-17) | 119.4 |
| A(15-13-25) | 117.0 |
| A(13-15-18) | 121.2 |
| A(13-15-19) | 119.0 |
| A(13-25-27) | 110.9 |
| A(13-25-28) | 112.0 |
| A(13-25-29) | 112.5 |
| A(16-14-17) | 118.6 |
| A(14-16-18) | 119.4 |
| A(14-16-20) | 119.9 |
| A(18-15-19) | 119.8 |
| A(15-18-16) | 119.6 |
| A(15-18-21) | 119.8 |
| A(18-16-20) | 120.6 |
| A(16-18-21) | 120.6 |
| A(23-22-24) | 109.7 |
| A(23-22-34) | 107.2 |
| A(24-22-34) | 111.1 |
| A(22-34-35) | 121.8 |
| A(22-34-43) | 115.8 |
| A(27-25-28) | 106.1 |

Bond Angles  
(continued)

|             |       |
|-------------|-------|
| A(27-25-29) | 106.4 |
| A(28-25-29) | 108.6 |
| A(30-26-31) | 107.0 |
| A(30-26-32) | 106.2 |
| A(31-26-32) | 107.2 |
| A(35-34-43) | 122.4 |
| A(34-35-36) | 118.9 |
| A(34-35-37) | 120.4 |
| A(34-43-38) | 118.1 |
| A(36-35-37) | 120.7 |
| A(35-36-39) | 118.9 |
| A(35-36-40) | 120.4 |
| A(39-36-40) | 120.8 |
| A(36-39-38) | 118.1 |
| A(36-39-42) | 121.5 |
| A(39-38-41) | 120.5 |
| A(39-38-43) | 123.6 |
| A(38-39-42) | 120.5 |
| A(41-38-43) | 115.8 |

{[2-(CF<sub>3</sub>)C<sub>6</sub>H<sub>4</sub>]<sub>2</sub>P(O)CH<sub>2</sub>}C<sub>5</sub>H<sub>4</sub>NO, 1c

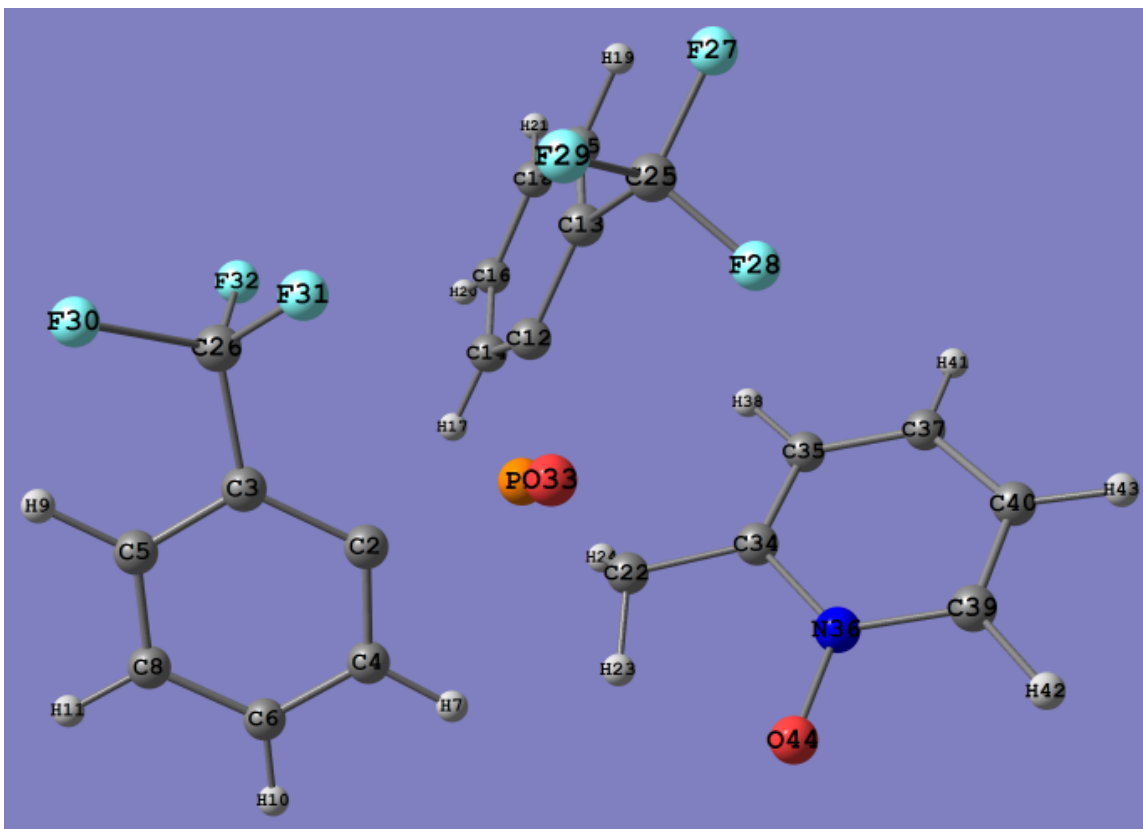

Coordinates  
(Angstroms)

|    |   |              |              |              |
|----|---|--------------|--------------|--------------|
| 1  | P | 0.121308000  | -0.719198000 | -0.250565000 |
| 2  | C | 1.828189000  | -1.402277000 | 0.089043000  |
| 3  | C | 3.046328000  | -0.752490000 | -0.218569000 |
| 4  | C | 1.907283000  | -2.725238000 | 0.546649000  |
| 5  | C | 4.262087000  | -1.414218000 | -0.039407000 |
| 6  | C | 3.123681000  | -3.379420000 | 0.721865000  |
| 7  | H | 1.005365000  | -3.276120000 | 0.768337000  |
| 8  | C | 4.309281000  | -2.721344000 | 0.430073000  |
| 9  | H | 5.179992000  | -0.896864000 | -0.284462000 |
| 10 | H | 3.133590000  | -4.403103000 | 1.077484000  |
| 11 | H | 5.264329000  | -3.217212000 | 0.555785000  |
| 12 | C | 0.058240000  | 0.880006000  | 0.701622000  |
| 13 | C | -0.551583000 | 2.081670000  | 0.284001000  |
| 14 | C | 0.647461000  | 0.845178000  | 1.971089000  |
| 15 | C | -0.537569000 | 3.191065000  | 1.132645000  |
| 16 | C | 0.651748000  | 1.952335000  | 2.812632000  |
| 17 | H | 1.137801000  | -0.061886000 | 2.306030000  |
| 18 | C | 0.058340000  | 3.133345000  | 2.388024000  |



|    |   |              |              |              |
|----|---|--------------|--------------|--------------|
| 19 | H | -1.002421000 | 4.108931000  | 0.802247000  |
| 20 | H | 1.125760000  | 1.890648000  | 3.785230000  |
| 21 | H | 0.057695000  | 4.010406000  | 3.024398000  |
| 22 | C | -1.010426000 | -1.800510000 | 0.768814000  |
| 23 | H | -0.879014000 | -2.825215000 | 0.418859000  |
| 24 | H | -0.736400000 | -1.718980000 | 1.822205000  |
| 25 | C | -1.241292000 | 2.254019000  | -1.061782000 |
| 26 | C | 3.156236000  | 0.685293000  | -0.681758000 |
| 27 | F | -1.852702000 | 3.466302000  | -1.138654000 |
| 28 | F | -2.208492000 | 1.338338000  | -1.254075000 |
| 29 | F | -0.387878000 | 2.196027000  | -2.090572000 |
| 30 | F | 4.254431000  | 0.875934000  | -1.445525000 |
| 31 | F | 2.103238000  | 1.099406000  | -1.398115000 |
| 32 | F | 3.280230000  | 1.528376000  | 0.376309000  |
| 33 | O | -0.226459000 | -0.678731000 | -1.695352000 |
| 34 | C | -2.455353000 | -1.475006000 | 0.570029000  |
| 35 | C | -3.138509000 | -0.452143000 | 1.212337000  |
| 36 | N | -3.136835000 | -2.305413000 | -0.306362000 |
| 37 | C | -4.487139000 | -0.216763000 | 0.977563000  |
| 38 | H | -2.584058000 | 0.170930000  | 1.902838000  |
| 39 | C | -4.465029000 | -2.068696000 | -0.549211000 |
| 40 | C | -5.145592000 | -1.044063000 | 0.071153000  |
| 41 | H | -5.005206000 | 0.589706000  | 1.479258000  |
| 42 | H | -4.898687000 | -2.761588000 | -1.254479000 |
| 43 | H | -6.193881000 | -0.905030000 | -0.161977000 |
| 44 | O | -2.556586000 | -3.289103000 | -0.872639000 |

Bond Lengths  
(Angstroms)

|          |       |
|----------|-------|
| R(1-33)  | 1.487 |
| R(2-3)   | 1.414 |
| R(2-4)   | 1.402 |
| R(3-5)   | 1.396 |
| R(3-26)  | 1.515 |
| R(4-6)   | 1.392 |
| R(4-7)   | 1.080 |
| R(5-8)   | 1.390 |
| R(5-9)   | 1.082 |
| R(6-8)   | 1.387 |
| R(6-10)  | 1.084 |
| R(8-11)  | 1.083 |
| R(12-13) | 1.411 |
| R(12-14) | 1.400 |
| R(13-15) | 1.397 |
| R(13-25) | 1.522 |
| R(14-16) | 1.391 |

Bond Lengths  
Continued

|          |       |
|----------|-------|
| R(14-17) | 1.084 |
| R(15-18) | 1.391 |
| R(15-19) | 1.081 |
| R(16-18) | 1.388 |
| R(16-20) | 1.084 |
| R(18-21) | 1.084 |
| R(22-23) | 1.091 |
| R(22-24) | 1.091 |
| R(22-34) | 1.494 |
| R(25-27) | 1.360 |
| R(25-28) | 1.346 |
| R(25-29) | 1.338 |
| R(26-30) | 1.351 |
| R(26-31) | 1.339 |
| R(26-32) | 1.359 |
| R(34-35) | 1.388 |
| R(34-36) | 1.386 |
| R(35-37) | 1.389 |
| R(35-38) | 1.083 |
| R(36-39) | 1.371 |
| R(36-44) | 1.275 |
| R(37-40) | 1.393 |
| R(37-41) | 1.082 |
| R(39-40) | 1.378 |
| R(39-42) | 1.080 |
| R(40-43) | 1.083 |

### Bond Angles

|             |       |
|-------------|-------|
| A(3-2-4)    | 117.1 |
| A(2-3-5)    | 120.3 |
| A(2-3-26)   | 124.4 |
| A(2-4-6)    | 122.3 |
| A(2-4-7)    | 120.1 |
| A(5-3-26)   | 115.2 |
| A(3-5-8)    | 121.3 |
| A(3-5-9)    | 118.9 |
| A(3-26-30)  | 111.5 |
| A(3-26-31)  | 113.6 |
| A(3-26-32)  | 111.0 |
| A(6-4-7)    | 117.7 |
| A(4-6-8)    | 119.8 |
| A(4-6-10)   | 119.5 |
| A(8-5-9)    | 119.8 |
| A(5-8-6)    | 119.2 |
| A(5-8-11)   | 120.0 |
| A(8-6-10)   | 120.6 |
| A(6-8-11)   | 120.8 |
| A(13-12-14) | 118.1 |
| A(12-13-15) | 119.5 |
| A(12-13-25) | 123.6 |
| A(12-14-16) | 122.0 |
| A(12-14-17) | 119.4 |
| A(15-13-25) | 116.9 |
| A(13-15-18) | 121.3 |
| A(13-15-19) | 119.0 |
| A(13-25-27) | 110.8 |
| A(13-25-28) | 112.0 |
| A(13-25-29) | 112.7 |
| A(16-14-17) | 118.5 |
| A(14-16-18) | 119.4 |
| A(14-16-20) | 119.9 |
| A(18-15-19) | 119.7 |
| A(15-18-16) | 119.6 |
| A(15-18-21) | 119.8 |
| A(18-16-20) | 120.7 |
| A(16-18-21) | 120.6 |
| A(23-22-24) | 110.5 |
| A(23-22-34) | 106.2 |
| A(24-22-34) | 110.8 |
| A(22-34-35) | 125.1 |
| A(22-34-36) | 115.4 |
| A(27-25-28) | 106.0 |

Bond Angles  
(continued)

|             |       |
|-------------|-------|
| A(27-25-29) | 106.4 |
| A(28-25-29) | 108.6 |
| A(30-26-31) | 107.0 |
| A(30-26-32) | 106.2 |
| A(31-26-32) | 107.2 |
| A(35-34-36) | 119.5 |
| A(34-35-37) | 121.6 |
| A(34-35-38) | 117.9 |
| A(34-36-39) | 119.0 |
| A(34-36-44) | 121.3 |
| A(37-35-38) | 120.5 |
| A(35-37-40) | 117.9 |
| A(35-37-41) | 120.9 |
| A(39-36-44) | 119.7 |
| A(36-39-40) | 121.8 |
| A(36-39-42) | 113.2 |
| A(40-37-41) | 121.2 |
| A(37-40-39) | 120.1 |
| A(37-40-43) | 121.4 |
| A(40-39-42) | 125.0 |
| A(39-40-43) | 118.5 |

**{[3,5-(CF<sub>3</sub>)<sub>2</sub>C<sub>6</sub>H<sub>3</sub>]<sub>2</sub>P(O)CH<sub>2</sub>}C<sub>5</sub>H<sub>4</sub>N, 3d**

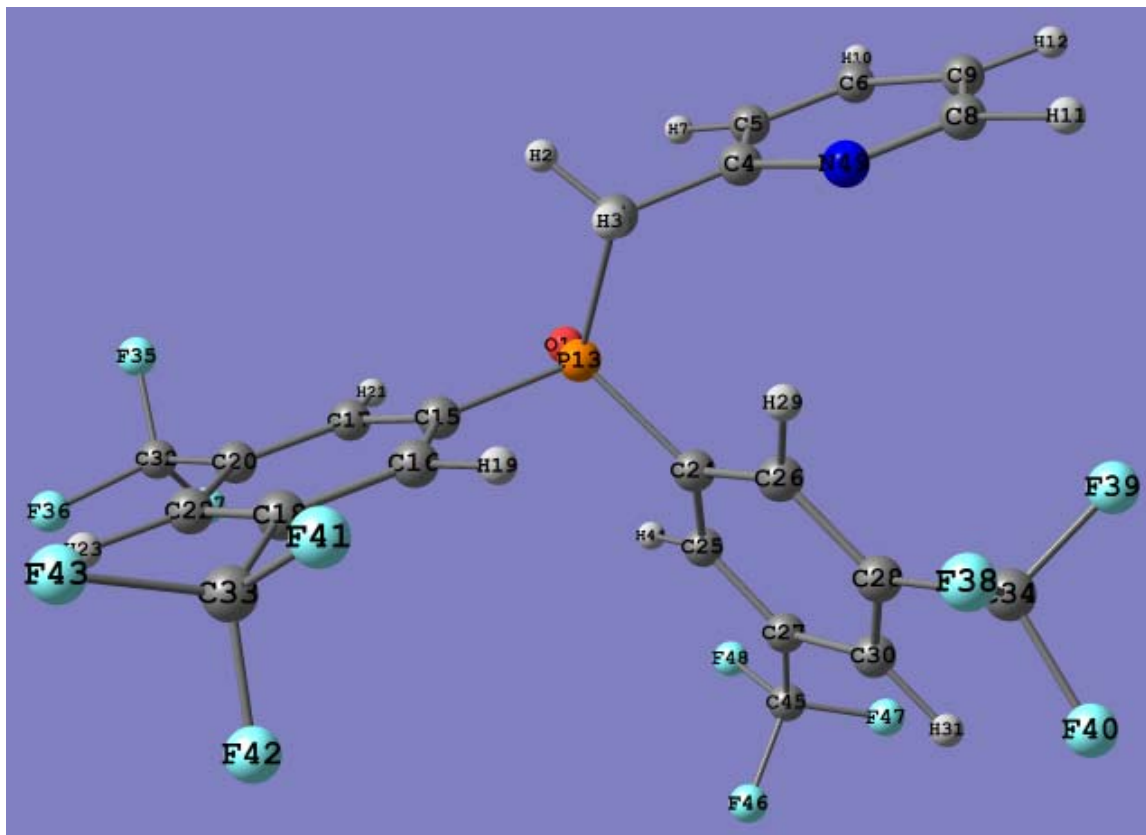

Atom Coordinates

|    |   |              |              |              |
|----|---|--------------|--------------|--------------|
| 1  | C | 0.250551000  | 2.715490000  | 0.266424000  |
| 2  | H | -0.524985000 | 3.448507000  | 0.024455000  |
| 3  | H | 0.119478000  | 2.420338000  | 1.308876000  |
| 4  | C | 1.632853000  | 3.294017000  | 0.083922000  |
| 5  | C | 1.961362000  | 4.066731000  | -1.033565000 |
| 6  | C | 3.253204000  | 4.569693000  | -1.137799000 |
| 7  | H | 1.222656000  | 4.252943000  | -1.803417000 |
| 8  | C | 3.754359000  | 3.497668000  | 0.937531000  |
| 9  | C | 4.171528000  | 4.285245000  | -0.131307000 |
| 10 | H | 3.537853000  | 5.172413000  | -1.992652000 |
| 11 | H | 4.440371000  | 3.240571000  | 1.739073000  |
| 12 | H | 5.187647000  | 4.657942000  | -0.172821000 |
| 13 | P | -0.130012000 | 1.292432000  | -0.845654000 |
| 14 | O | -0.244185000 | 1.643382000  | -2.296333000 |
| 15 | C | -1.717239000 | 0.626908000  | -0.195081000 |
| 16 | C | -1.859287000 | 0.099189000  | 1.092122000  |
| 17 | C | -2.817783000 | 0.670655000  | -1.049606000 |
| 18 | C | -3.097239000 | -0.370735000 | 1.517233000  |

|    |   |              |              |              |
|----|---|--------------|--------------|--------------|
| 19 | H | -1.016044000 | 0.046913000  | 1.770221000  |
| 20 | C | -4.056956000 | 0.197986000  | -0.613251000 |
| 21 | H | -2.693790000 | 1.069653000  | -2.050032000 |
| 22 | C | -4.202368000 | -0.322076000 | 0.666725000  |
| 23 | H | -5.164676000 | -0.682742000 | 1.003195000  |
| 24 | C | 1.115838000  | -0.015819000 | -0.530551000 |
| 25 | C | 1.337918000  | -0.929543000 | -1.568577000 |
| 26 | C | 1.836319000  | -0.130178000 | 0.657711000  |
| 27 | C | 2.256466000  | -1.958630000 | -1.401269000 |
| 28 | C | 2.764878000  | -1.162140000 | 0.809732000  |
| 29 | H | 1.724129000  | 0.595913000  | 1.452342000  |
| 30 | C | 2.974203000  | -2.080633000 | -0.210512000 |
| 31 | H | 3.695892000  | -2.877119000 | -0.086748000 |
| 32 | C | -5.236522000 | 0.283279000  | -1.549151000 |
| 33 | C | -3.240903000 | -0.988760000 | 2.884549000  |
| 34 | C | 3.577234000  | -1.225873000 | 2.077416000  |
| 35 | F | -5.562726000 | 1.567874000  | -1.809309000 |
| 36 | F | -6.333367000 | -0.313929000 | -1.042667000 |
| 37 | F | -4.967774000 | -0.300415000 | -2.734891000 |
| 38 | F | 2.811284000  | -1.010597000 | 3.167918000  |
| 39 | F | 4.547413000  | -0.284184000 | 2.089352000  |
| 40 | F | 4.181481000  | -2.419869000 | 2.234902000  |
| 41 | F | -2.328435000 | -0.504518000 | 3.752518000  |
| 42 | F | -3.072744000 | -2.328154000 | 2.840798000  |
| 43 | F | -4.462136000 | -0.762115000 | 3.409714000  |
| 44 | H | 0.805639000  | -0.817476000 | -2.504812000 |
| 45 | C | 2.475059000  | -2.980041000 | -2.488329000 |
| 46 | F | 1.890872000  | -4.158832000 | -2.177457000 |
| 47 | F | 3.788962000  | -3.233628000 | -2.671130000 |
| 48 | F | 1.969357000  | -2.582982000 | -3.670259000 |
| 49 | N | 2.515564000  | 3.009448000  | 1.050886000  |

Bond Lengths  
(Angstroms)

|         |       |
|---------|-------|
| R(1-2)  | 1.094 |
| R(1-3)  | 1.091 |
| R(1-4)  | 1.510 |
| R(1-13) | 1.846 |
| R(4-5)  | 1.398 |
| R(4-49) | 1.340 |
| R(5-6)  | 1.390 |
| R(5-7)  | 1.083 |
| R(6-9)  | 1.392 |
| R(6-10) | 1.084 |
| R(8-9)  | 1.392 |

Bond Lengths

(continued)

|          |       |
|----------|-------|
| R(8-11)  | 1.086 |
| R(8-49)  | 1.336 |
| R(9-12)  | 1.083 |
| R(13-14) | 1.497 |
| R(13-15) | 1.840 |
| R(13-24) | 1.834 |
| R(15-16) | 1.398 |
| R(15-17) | 1.394 |
| R(16-18) | 1.391 |
| R(16-19) | 1.083 |
| R(17-20) | 1.396 |
| R(17-21) | 1.084 |
| R(18-22) | 1.395 |
| R(18-33) | 1.507 |
| R(20-22) | 1.389 |
| R(20-32) | 1.508 |
| R(22-23) | 1.081 |
| R(24-25) | 1.401 |
| R(24-26) | 1.394 |
| R(25-27) | 1.390 |
| R(25-44) | 1.083 |
| R(26-28) | 1.397 |
| R(26-29) | 1.082 |
| R(27-30) | 1.396 |
| R(27-45) | 1.508 |
| R(28-30) | 1.389 |
| R(28-34) | 1.507 |
| R(30-31) | 1.082 |
| R(32-35) | 1.351 |
| R(32-36) | 1.348 |
| R(32-37) | 1.349 |
| R(33-41) | 1.349 |
| R(33-42) | 1.351 |
| R(33-43) | 1.349 |
| R(34-38) | 1.350 |
| R(34-39) | 1.352 |
| R(34-40) | 1.347 |
| R(45-46) | 1.352 |
| R(45-47) | 1.351 |
| R(45-48) | 1.345 |

### Bond Angles

|             |       |
|-------------|-------|
| A(2-1-3)    | 107.9 |
| A(2-1-4)    | 111.4 |
| A(2-1-13)   | 103.7 |
| A(3-1-4)    | 109.2 |
| A(3-1-13)   | 110.0 |
| A(4-1-13)   | 114.3 |
| A(1-4-5)    | 121.6 |
| A(1-4-49)   | 115.8 |
| A(1-13-14)  | 114.8 |
| A(1-13-15)  | 104.1 |
| A(1-13-24)  | 107.8 |
| A(5-4-49)   | 122.7 |
| A(4-5-6)    | 118.6 |
| A(4-5-7)    | 120.2 |
| A(4-49-8)   | 118.2 |
| A(6-5-7)    | 121.2 |
| A(5-6-9)    | 119.0 |
| A(5-6-10)   | 120.3 |
| A(9-6-10)   | 120.7 |
| A(6-9-8)    | 118.2 |
| A(6-9-12)   | 121.4 |
| A(9-8-11)   | 120.8 |
| A(9-8-49)   | 123.4 |
| A(8-9-12)   | 120.4 |
| A(11-8-49)  | 115.9 |
| A(14-13-15) | 111.2 |
| A(14-13-24) | 112.7 |
| A(15-13-24) | 105.5 |
| A(13-15-16) | 123.3 |
| A(13-15-17) | 116.9 |
| A(13-24-25) | 116.5 |
| A(13-24-26) | 123.8 |
| A(16-15-17) | 119.7 |
| A(15-16-18) | 120.0 |
| A(15-16-19) | 121.0 |
| A(15-17-20) | 119.9 |
| A(15-17-21) | 119.1 |
| A(18-16-19) | 119.0 |
| A(16-18-22) | 120.5 |
| A(16-18-33) | 120.0 |
| A(20-17-21) | 121.0 |
| A(17-20-22) | 120.5 |
| A(17-20-32) | 118.8 |
| A(22-18-33) | 119.5 |



Bond Angles  
(continued)

|             |       |
|-------------|-------|
| A(18-22-20) | 119.5 |
| A(18-22-23) | 120.2 |
| A(18-33-41) | 111.8 |
| A(18-33-42) | 111.4 |
| A(18-33-43) | 111.8 |
| A(22-20-32) | 120.7 |
| A(20-22-23) | 120.3 |
| A(20-32-35) | 111.2 |
| A(20-32-36) | 112.2 |
| A(20-32-37) | 111.4 |
| A(25-24-26) | 119.7 |
| A(24-25-27) | 119.9 |
| A(24-25-44) | 119.7 |
| A(24-26-28) | 119.8 |
| A(24-26-29) | 121.1 |
| A(27-25-44) | 120.4 |
| A(25-27-30) | 120.5 |
| A(25-27-45) | 120.7 |
| A(28-26-29) | 119.0 |
| A(26-28-30) | 120.6 |
| A(26-28-34) | 118.8 |
| A(30-27-45) | 118.8 |
| A(27-30-28) | 119.4 |
| A(27-30-31) | 120.3 |
| A(27-45-46) | 111.2 |
| A(27-45-47) | 111.5 |
| A(27-45-48) | 112.3 |
| A(30-28-34) | 120.6 |
| A(28-30-31) | 120.2 |
| A(28-34-38) | 111.5 |
| A(28-34-39) | 111.4 |
| A(28-34-40) | 112.2 |
| A(35-32-36) | 107.3 |
| A(35-32-37) | 106.9 |
| A(36-32-37) | 107.5 |
| A(41-33-42) | 107.0 |
| A(41-33-43) | 107.6 |
| A(42-33-43) | 107.0 |
| A(38-34-39) | 106.8 |
| A(38-34-40) | 107.5 |
| A(39-34-40) | 107.1 |
| A(46-45-47) | 106.7 |

Bond Angles  
(continued)

|             |       |
|-------------|-------|
| A(46-45-48) | 107.3 |
| A(47-45-48) | 107.6 |

**{[3,5-(CF<sub>3</sub>)<sub>2</sub>C<sub>6</sub>H<sub>3</sub>]<sub>2</sub>P(O)CH<sub>2</sub>}C<sub>5</sub>H<sub>4</sub>NO, 1d**

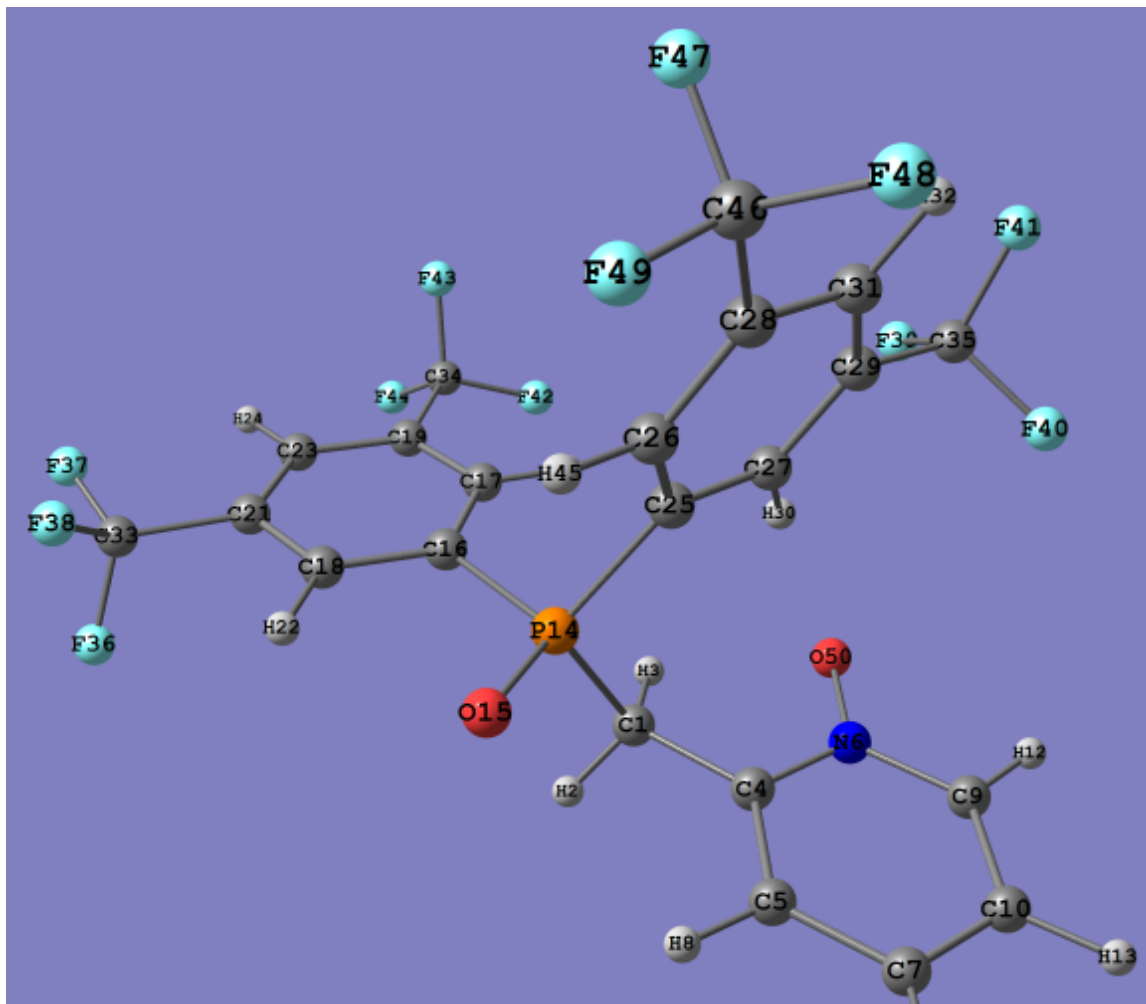

Atom Coordinates  
(Angstroms)

|    |   |              |              |              |
|----|---|--------------|--------------|--------------|
| 1  | C | -0.226259000 | -2.525755000 | -0.841027000 |
| 2  | H | 0.498692000  | -3.114232000 | -1.411005000 |
| 3  | H | -0.057188000 | -2.694386000 | 0.222780000  |
| 4  | C | -1.621438000 | -2.942216000 | -1.179369000 |
| 5  | C | -2.102620000 | -3.092359000 | -2.474539000 |
| 6  | N | -2.458023000 | -3.187320000 | -0.107419000 |
| 7  | C | -3.411268000 | -3.491525000 | -2.712563000 |
| 8  | H | -1.427139000 | -2.871098000 | -3.291756000 |
| 9  | C | -3.747169000 | -3.582827000 | -0.337151000 |
| 10 | C | -4.235129000 | -3.740322000 | -1.616159000 |
| 11 | H | -3.779316000 | -3.602551000 | -3.723991000 |

|    |   |              |              |              |
|----|---|--------------|--------------|--------------|
| 12 | H | -4.313895000 | -3.744040000 | 0.567638000  |
| 13 | H | -5.263933000 | -4.052948000 | -1.742283000 |
| 14 | P | 0.183615000  | -0.783087000 | -1.300456000 |
| 15 | O | 0.301571000  | -0.557652000 | -2.776337000 |
| 16 | C | 1.777779000  | -0.463774000 | -0.444250000 |
| 17 | C | 1.922033000  | -0.505110000 | 0.946635000  |
| 18 | C | 2.878119000  | -0.170956000 | -1.248174000 |
| 19 | C | 3.164125000  | -0.257761000 | 1.520323000  |
| 20 | H | 1.078583000  | -0.725630000 | 1.589663000  |
| 21 | C | 4.121723000  | 0.071882000  | -0.662040000 |
| 22 | H | 2.751151000  | -0.128978000 | -2.323875000 |
| 23 | C | 4.269688000  | 0.029812000  | 0.718441000  |
| 24 | H | 5.235088000  | 0.217116000  | 1.168768000  |
| 25 | C | -1.047774000 | 0.331661000  | -0.524032000 |
| 26 | C | -1.258034000 | 1.554950000  | -1.174974000 |
| 27 | C | -1.762955000 | 0.026702000  | 0.633409000  |
| 28 | C | -2.163370000 | 2.469527000  | -0.653169000 |
| 29 | C | -2.679701000 | 0.952660000  | 1.139677000  |
| 30 | H | -1.656866000 | -0.935520000 | 1.128207000  |
| 31 | C | -2.879028000 | 2.172827000  | 0.508285000  |
| 32 | H | -3.591844000 | 2.882169000  | 0.907513000  |
| 33 | C | 5.308919000  | 0.341686000  | -1.551962000 |
| 34 | C | 3.323555000  | -0.246714000 | 3.019587000  |
| 35 | C | -3.489766000 | 0.578295000  | 2.355527000  |
| 36 | F | 5.713349000  | -0.782894000 | -2.182387000 |
| 37 | F | 6.365468000  | 0.812870000  | -0.860341000 |
| 38 | F | 5.014359000  | 1.243677000  | -2.509716000 |
| 39 | F | -2.717040000 | 0.052745000  | 3.325674000  |
| 40 | F | -4.429208000 | -0.345897000 | 2.053143000  |
| 41 | F | -4.134400000 | 1.640430000  | 2.881011000  |
| 42 | F | 2.341439000  | -0.932014000 | 3.636951000  |
| 43 | F | 3.298713000  | 1.012808000  | 3.507082000  |
| 44 | F | 4.499380000  | -0.790098000 | 3.397466000  |
| 45 | H | -0.727700000 | 1.772111000  | -2.093514000 |
| 46 | C | -2.383727000 | 3.804845000  | -1.317006000 |
| 47 | F | -1.879573000 | 4.813173000  | -0.571419000 |
| 48 | F | -3.699968000 | 4.062956000  | -1.479539000 |
| 49 | F | -1.804443000 | 3.874604000  | -2.529396000 |
| 50 | O | -2.045644000 | -3.042208000 | 1.102720000  |

### Bond Lengths

|          |       |
|----------|-------|
| R(1-2)   | 1.094 |
| R(1-3)   | 1.090 |
| R(1-4)   | 1.495 |
| R(1-14)  | 1.848 |
| R(4-5)   | 1.390 |
| R(4-6)   | 1.382 |
| R(5-7)   | 1.389 |
| R(5-8)   | 1.083 |
| R(6-9)   | 1.368 |
| R(6-50)  | 1.287 |
| R(7-10)  | 1.394 |
| R(7-11)  | 1.082 |
| R(9-10)  | 1.378 |
| R(9-12)  | 1.080 |
| R(10-13) | 1.083 |
| R(14-15) | 1.498 |
| R(14-16) | 1.838 |
| R(14-25) | 1.834 |
| R(16-17) | 1.399 |
| R(16-18) | 1.394 |
| R(17-19) | 1.390 |
| R(17-20) | 1.083 |
| R(18-21) | 1.396 |
| R(18-22) | 1.084 |
| R(19-23) | 1.396 |
| R(19-34) | 1.508 |
| R(21-23) | 1.389 |
| R(21-33) | 1.508 |
| R(23-24) | 1.082 |
| R(25-26) | 1.402 |
| R(25-27) | 1.394 |
| R(26-28) | 1.389 |
| R(26-45) | 1.083 |
| R(27-29) | 1.398 |
| R(27-30) | 1.087 |
| R(28-31) | 1.396 |
| R(28-46) | 1.507 |
| R(29-31) | 1.388 |
| R(29-35) | 1.508 |
| R(31-32) | 1.082 |
| R(33-36) | 1.351 |
| R(33-37) | 1.348 |
| R(33-38) | 1.348 |

### Bond Lengths (continued)

|          |       |
|----------|-------|
| R(34-42) | 1.347 |
| R(34-43) | 1.351 |
| R(34-44) | 1.349 |
| R(35-39) | 1.347 |
| R(35-40) | 1.352 |
| R(35-41) | 1.349 |
| R(46-47) | 1.352 |
| R(46-48) | 1.351 |
| R(46-49) | 1.345 |

### Bond Angles

|             |       |
|-------------|-------|
| A(2-1-3)    | 108.8 |
| A(2-1-4)    | 110.5 |
| A(2-1-14)   | 103.3 |
| A(3-1-4)    | 108.8 |
| A(3-1-14)   | 110.7 |
| A(4-1-14)   | 114.4 |
| A(1-4-5)    | 124.3 |
| A(1-4-6)    | 116.0 |
| A(1-14-15)  | 113.9 |
| A(1-14-16)  | 103.9 |
| A(1-14-25)  | 108.6 |
| A(5-4-6)    | 119.6 |
| A(4-5-7)    | 121.1 |
| A(4-5-8)    | 117.7 |
| A(4-6-9)    | 119.4 |
| A(4-6-50)   | 121.0 |
| A(7-5-8)    | 121.1 |
| A(5-7-10)   | 118.3 |
| A(5-7-11)   | 120.7 |
| A(9-6-50)   | 119.5 |
| A(6-9-10)   | 121.5 |
| A(6-9-12)   | 113.4 |
| A(10-7-11)  | 121.1 |
| A(7-10-9)   | 120.0 |
| A(7-10-13)  | 121.4 |
| A(10-9-12)  | 125.1 |
| A(9-10-13)  | 118.5 |
| A(15-14-16) | 111.4 |
| A(15-14-25) | 112.3 |
| A(16-14-25) | 106.2 |
| A(14-16-17) | 123.2 |
| A(14-16-18) | 116.9 |
| A(14-25-26) | 115.8 |
| A(14-25-27) | 124.3 |

### Bond Angles (continued)

|             |       |
|-------------|-------|
| A(17-16-18) | 119.9 |
| A(16-17-19) | 119.8 |
| A(16-17-20) | 121.1 |
| A(16-18-21) | 119.8 |
| A(16-18-22) | 119.2 |
| A(19-17-20) | 119.1 |
| A(17-19-23) | 120.5 |
| A(17-19-34) | 120.4 |
| A(21-18-22) | 120.9 |
| A(18-21-23) | 120.5 |
| A(18-21-33) | 119.0 |
| A(23-19-34) | 119.1 |
| A(19-23-21) | 119.5 |
| A(19-23-24) | 120.2 |
| A(19-34-42) | 112.0 |
| A(19-34-43) | 111.3 |
| A(19-34-44) | 111.6 |
| A(23-21-33) | 120.5 |
| A(21-23-24) | 120.2 |
| A(21-33-36) | 111.2 |
| A(21-33-37) | 112.1 |
| A(21-33-38) | 111.5 |
| A(26-25-27) | 120.0 |
| A(25-26-28) | 119.9 |
| A(25-26-45) | 119.7 |
| A(25-27-29) | 119.5 |
| A(25-27-30) | 121.4 |
| A(28-26-45) | 120.4 |
| A(26-28-31) | 120.5 |
| A(26-28-46) | 120.9 |
| A(29-27-30) | 119.0 |
| A(27-29-31) | 120.8 |
| A(27-29-35) | 118.7 |
| A(31-28-46) | 118.7 |
| A(28-31-29) | 119.4 |
| A(28-31-32) | 120.4 |
| A(28-46-47) | 111.3 |
| A(28-46-48) | 111.4 |
| A(28-46-49) | 112.3 |
| A(31-29-35) | 120.5 |
| A(29-31-32) | 120.2 |
| A(29-35-39) | 111.7 |
| A(29-35-40) | 111.3 |

### Bond Angles (continued)

|             |       |
|-------------|-------|
| A(29-35-41) | 112.0 |
| A(36-33-37) | 107.2 |
| A(36-33-38) | 106.9 |
| A(37-33-38) | 107.6 |
| A(42-34-43) | 107.2 |
| A(42-34-44) | 107.6 |
| A(43-34-44) | 106.9 |
| A(39-35-40) | 107.0 |
| A(39-35-41) | 107.5 |
| A(40-35-41) | 107.1 |
| A(47-46-48) | 106.7 |
| A(47-46-49) | 107.3 |
| A(48-46-49) | 107.5 |
